# Supplementary material for: Shift of the reduction potential of nickel(ii) Schiff base complexes in the presence of redox innocent metal ions
Source: Royal Society of Chemistry journal article supplement (doi:10.1039/d4dt00953c), 2024-01-01
Supplement: d4dt00953c1.pdf [file d4dt00953c1.pdf]

## **Shift of Redox Potential of Nickel(II) Schiff Base Complexes in Presence of Redox Innocent Metal Ions**

Pradip Bhunia<sup>1</sup>, Rosa M. Gomila,<sup>2</sup> Antonio Frontera<sup>\*,2</sup> and Ashutosh Ghosh<sup>\*,1</sup>

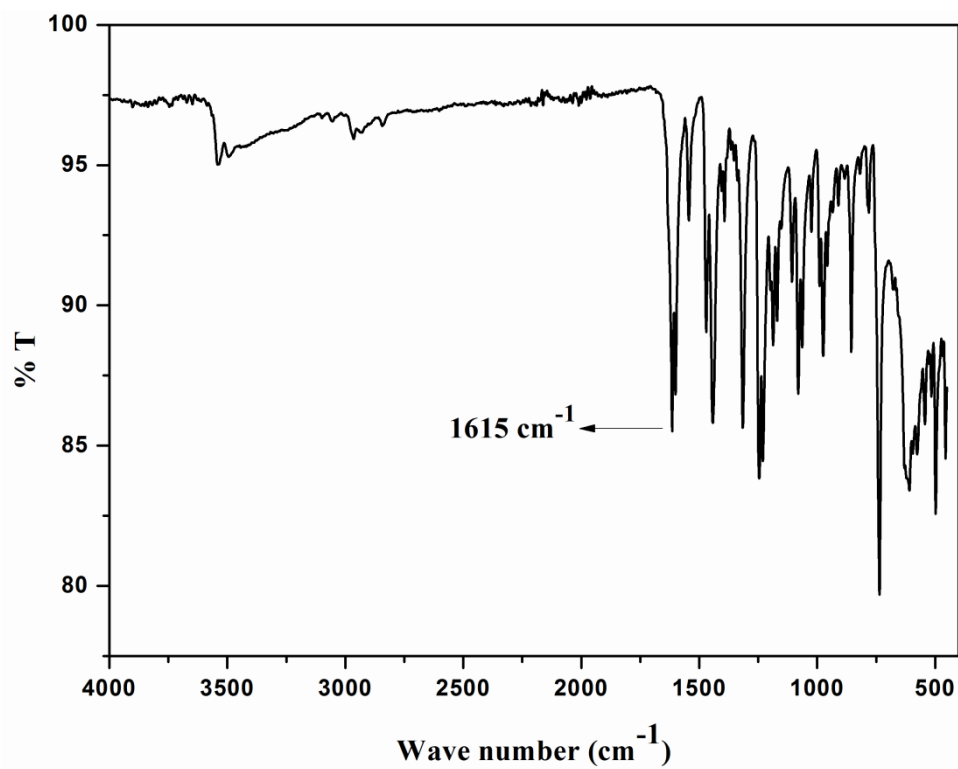

**Fig. S1** IR spectrum of NiL<sup>en</sup>.

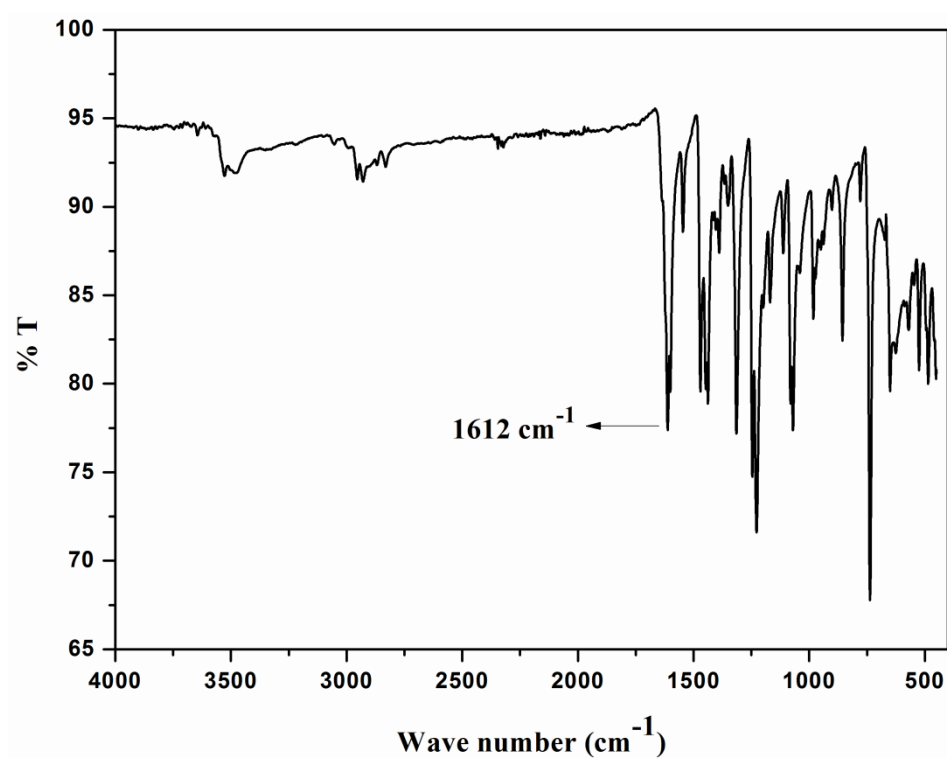

**Fig. S2** IR spectrum of NiL<sup>pn</sup>.

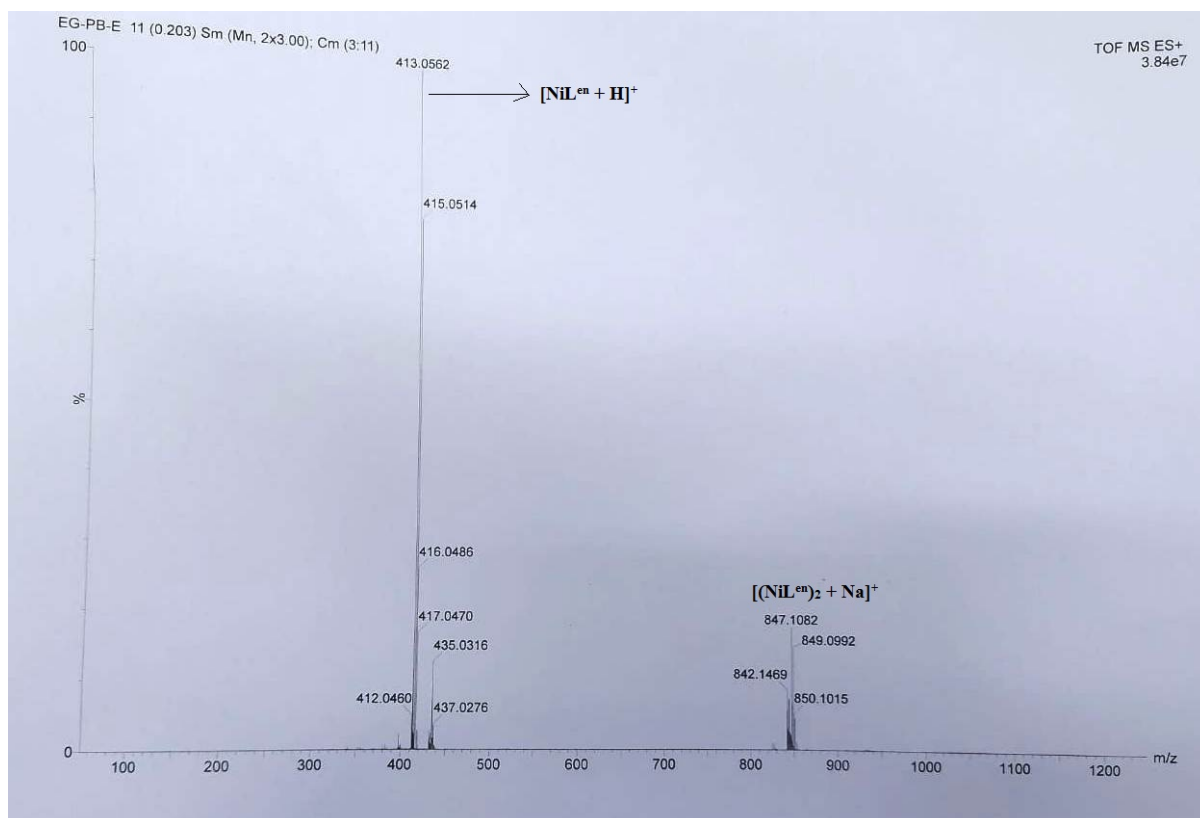

**Fig. S3** Mass spectrometric analysis of  $\text{NiL}^{\text{en}}$ .

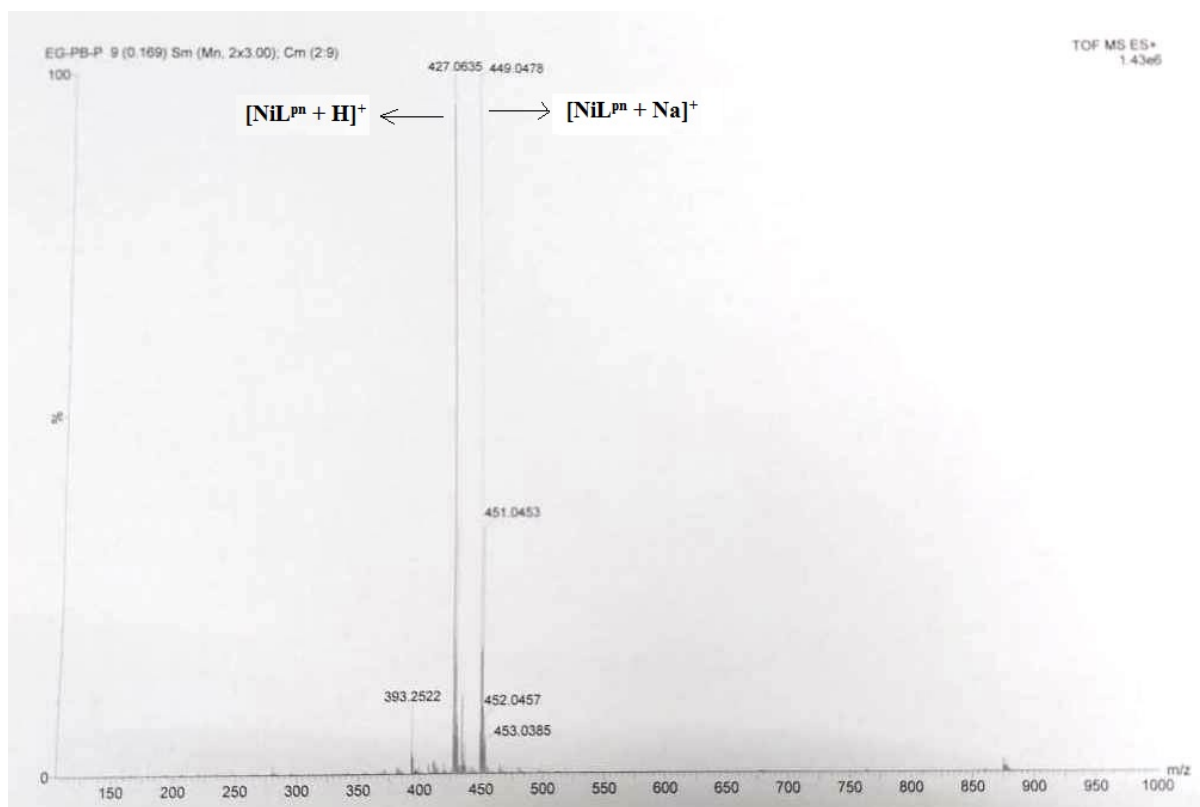

**Fig. S4** Mass spectrometric analysis of  $\text{NiL}^{\text{pn}}$ .

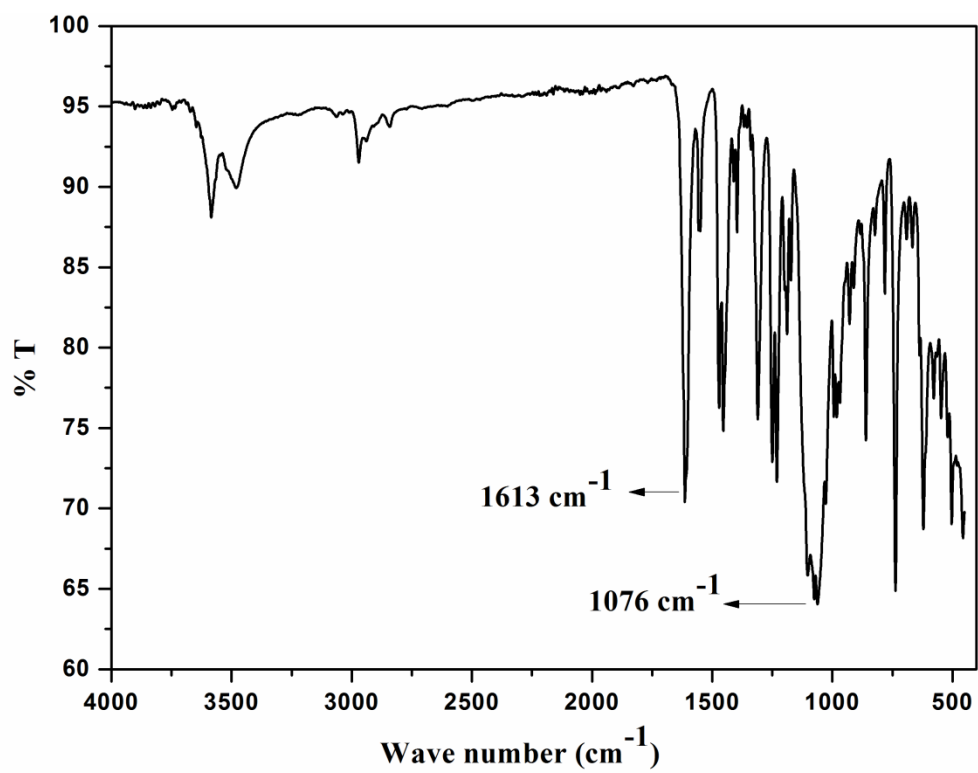

Fig. S5 IR spectrum of complex 1.

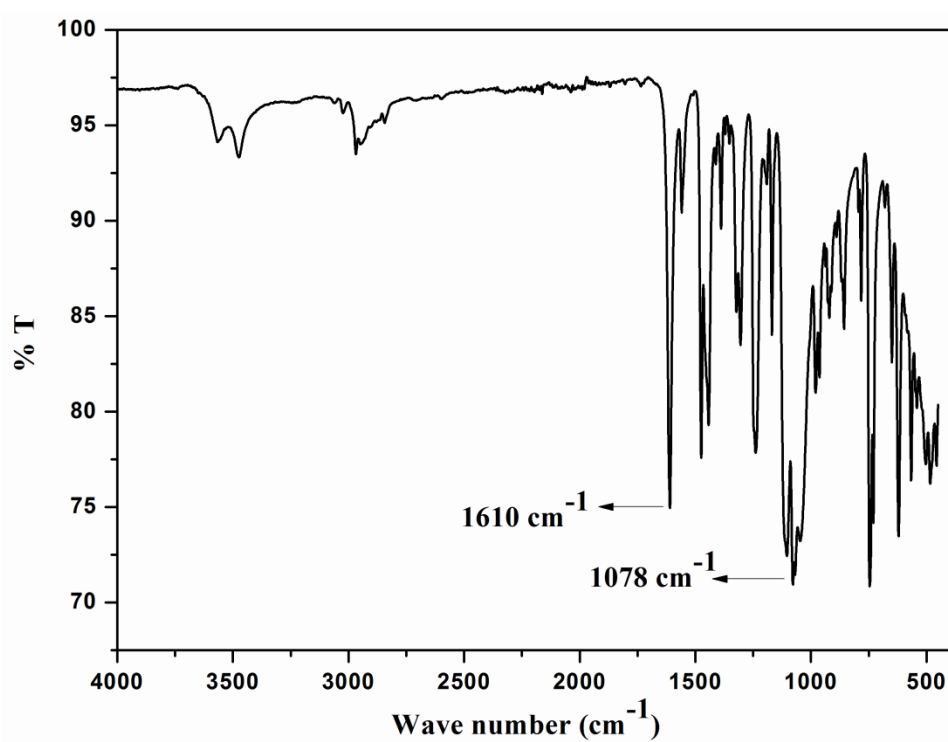

Fig. S6 IR spectrum of complex 2.

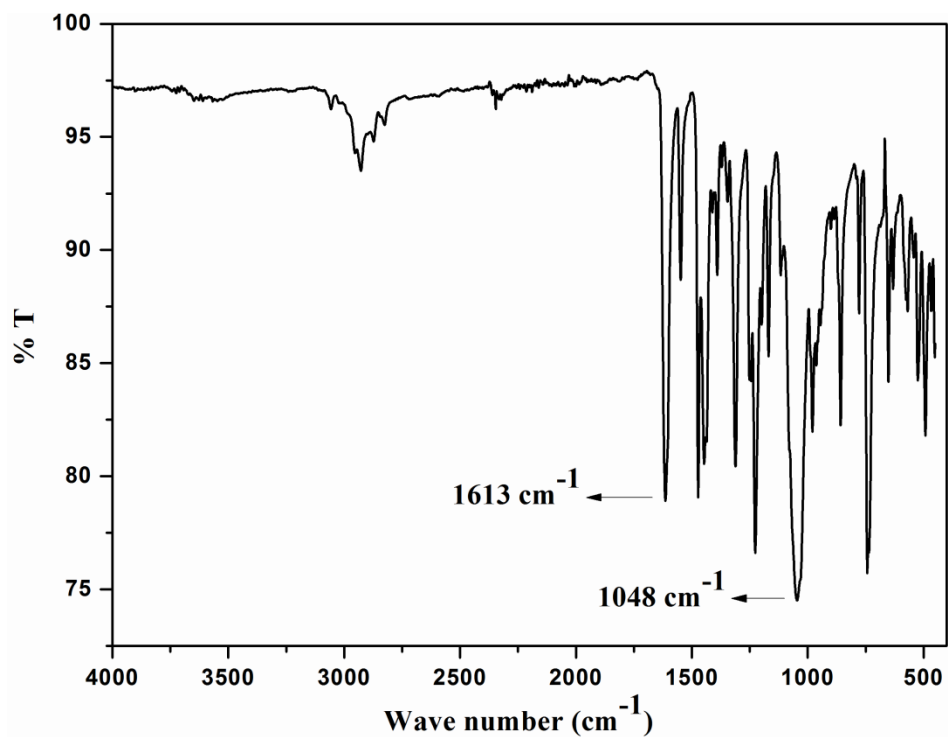

**Fig. S7** IR spectrum of complex 3.

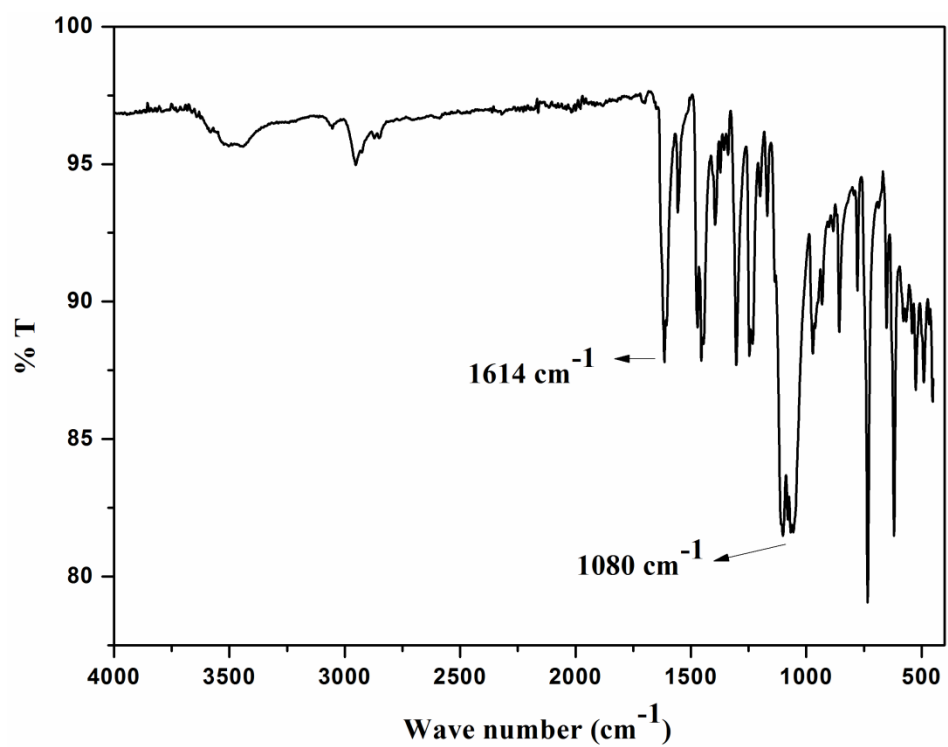

**Fig. S8** IR spectrum of complex 4.

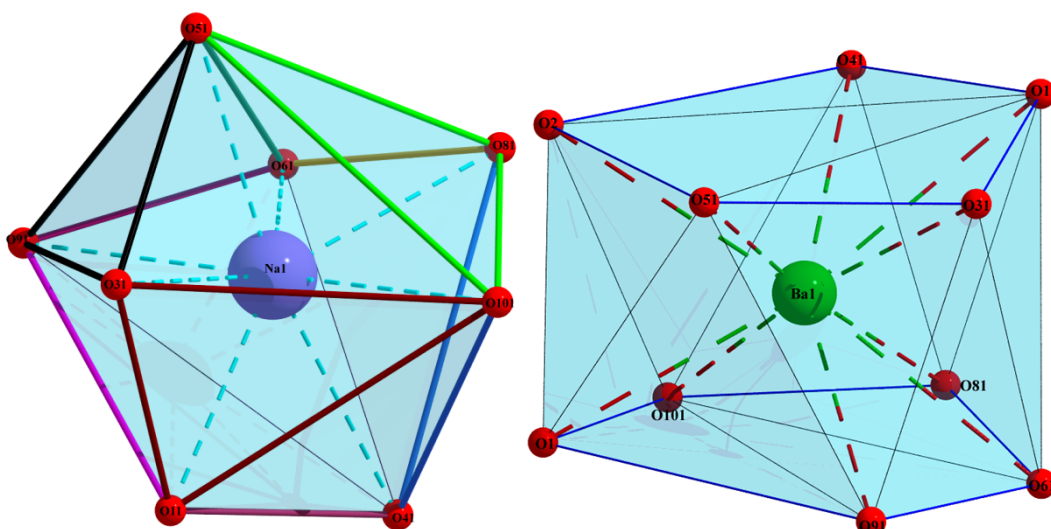

**Fig. S9** Polyhedral view of the coordination sphere around the sodium and barium centres for complexes **3** (left) and **4** (right), respectively.

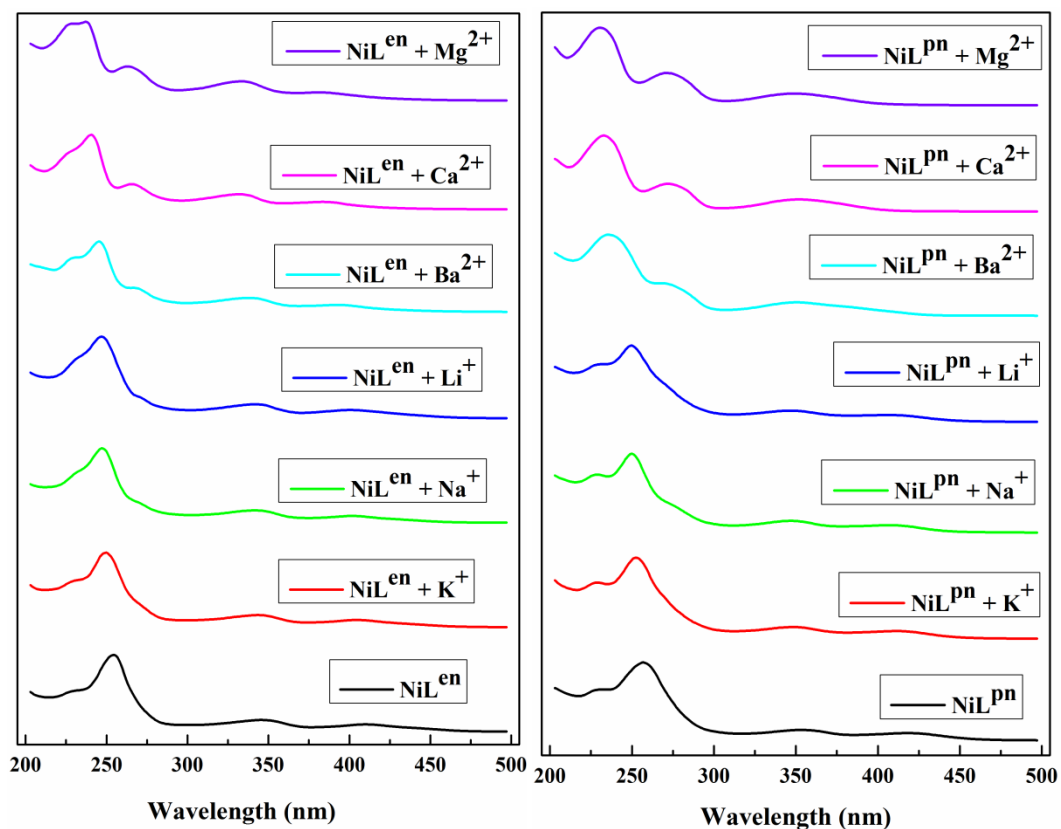

**Fig. S10** CT spectra of  $5 \times 10^{-5}$  M nickel complexes,  $[\text{NiL}^{\text{en}}]$  (left) and  $[\text{NiL}^{\text{pn}}]$  (right) in presence of equivalent amount of each of  $\text{Li}^+$ ,  $\text{Na}^+$ ,  $\text{K}^+$ ,  $\text{Mg}^{2+}$ ,  $\text{Ca}^{2+}$  and  $\text{Ba}^{2+}$  ions in acetonitrile solution.

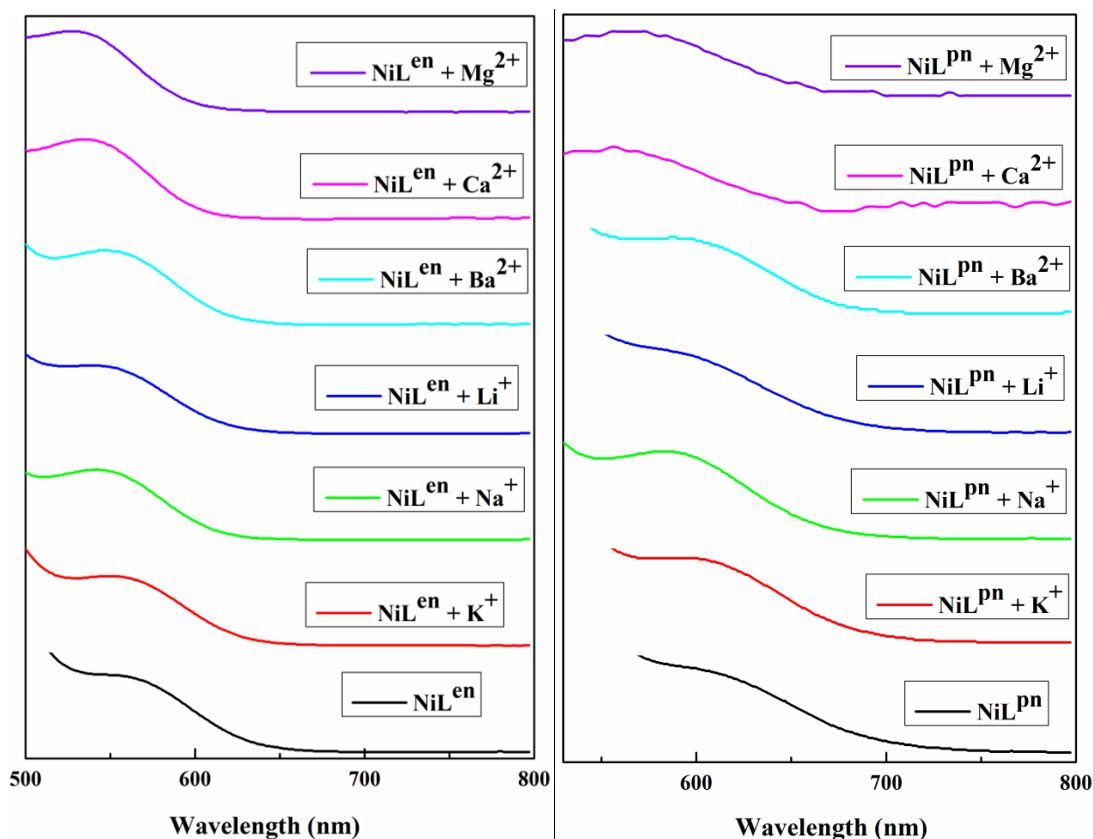

**Fig. S11** d-d spectra of  $10^{-3}$  M nickel complexes,  $[\text{NiL}^{\text{en}}]$  (left) and  $[\text{NiL}^{\text{pn}}]$  (right) in presence of equivalent amount of each of  $\text{Li}^+$ ,  $\text{Na}^+$ ,  $\text{K}^+$ ,  $\text{Mg}^{2+}$ ,  $\text{Ca}^{2+}$  and  $\text{Ba}^{2+}$  ions in acetonitrile solution.

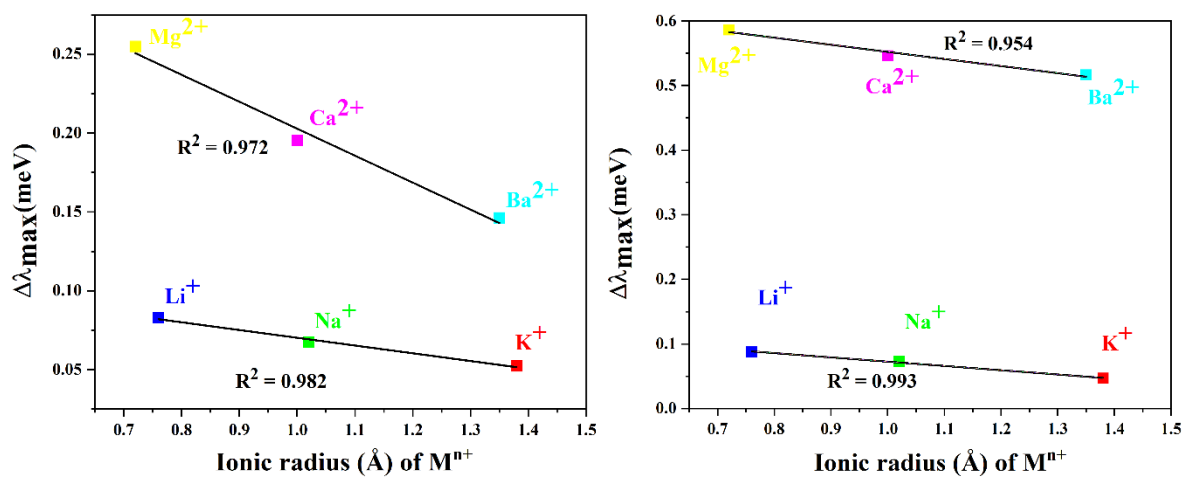

**Fig. S12** Dependence of MLCT energy of Lewis acid bound nickel metalloligands on the ionic radius of the corresponding metal ions (left,  $[\text{NiL}^{\text{en}}]$ ) and (right,  $[\text{NiL}^{\text{pn}}]$ ).

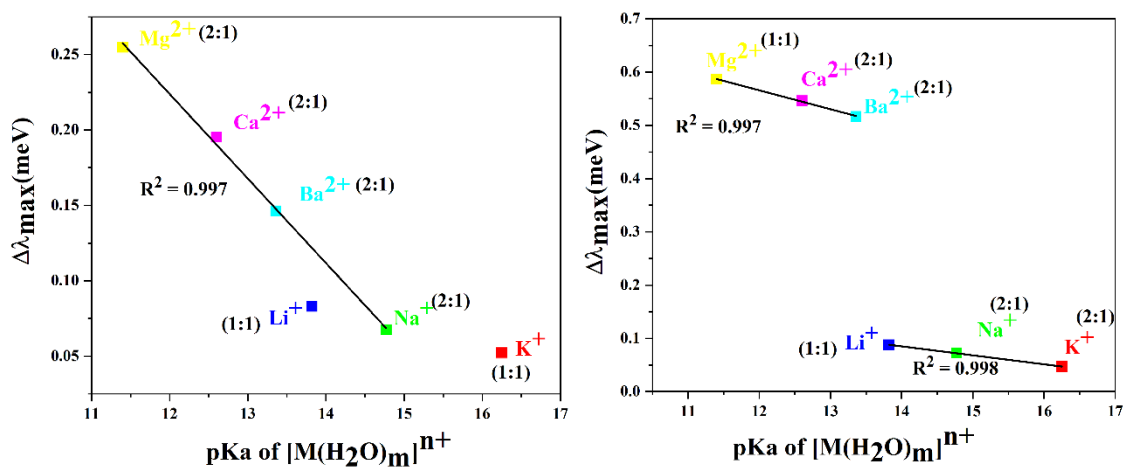

**Fig. S13** Dependence of MLCT energy of Lewis acid bound nickel metalloligands on the pKa value of the corresponding metal ions (left,  $[\text{NiL}^{\text{en}}]$ ) and (right,  $[\text{NiL}^{\text{pn}}]$ ).

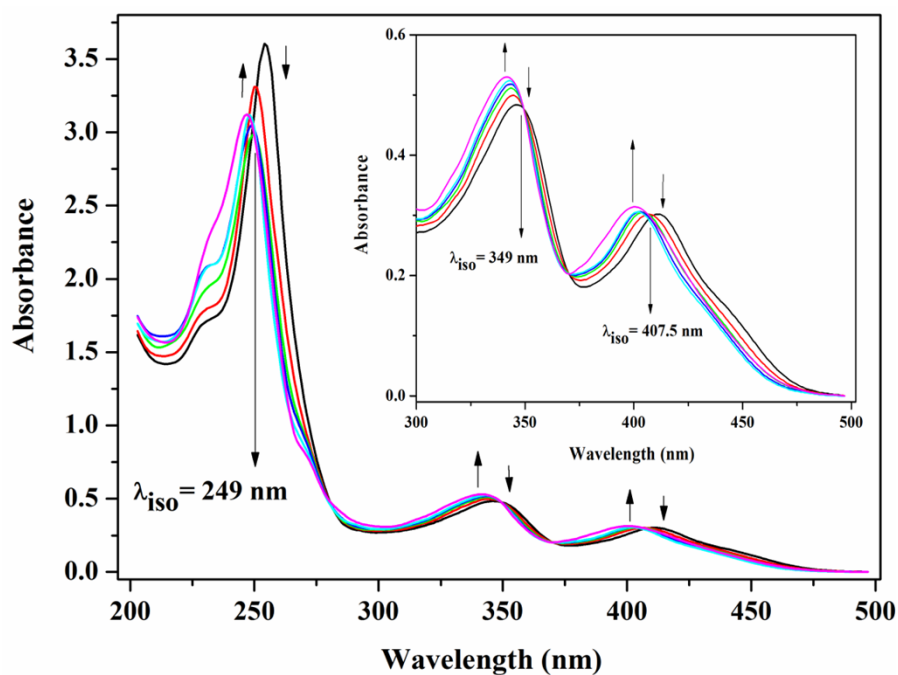

**Fig. S14** Spectrophotometric titration of  $5 \times 10^{-5}$  M acetonitrile solution of  $[\text{NiL}^{\text{en}}]$  by  $\text{LiClO}_4$ .



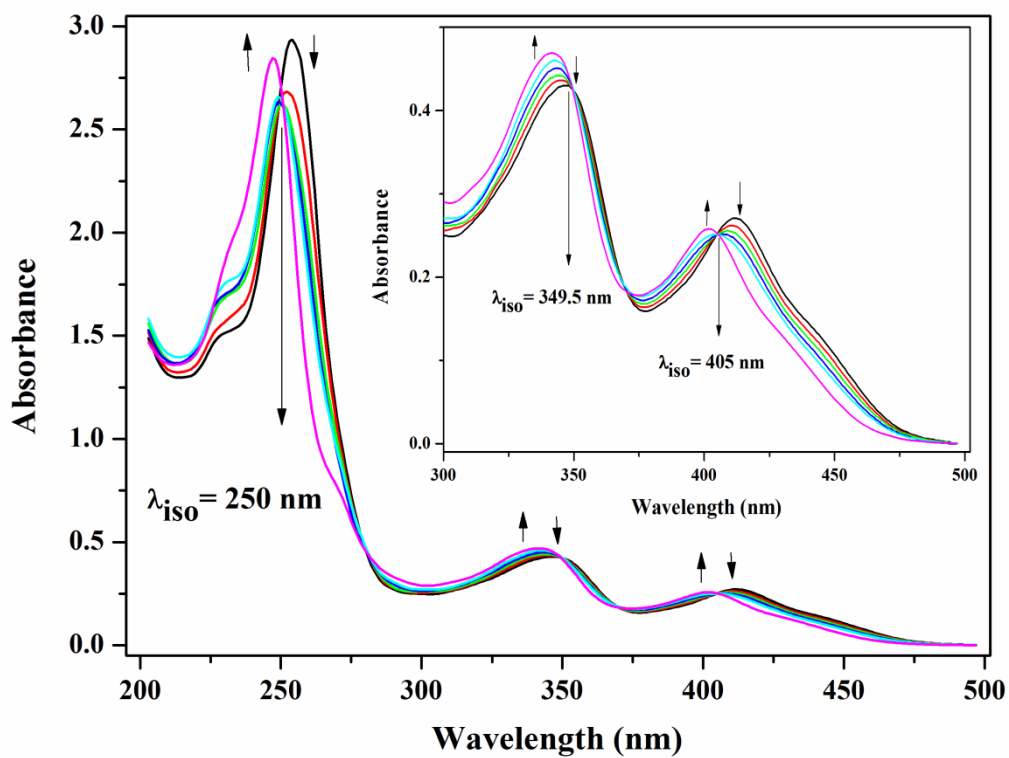

**Fig. S15** Spectrophotometric titration of  $5 \times 10^{-5}$  M acetonitrile solution of  $[\text{NiL}^{\text{en}}]$  by  $\text{NaBF}_4$ .

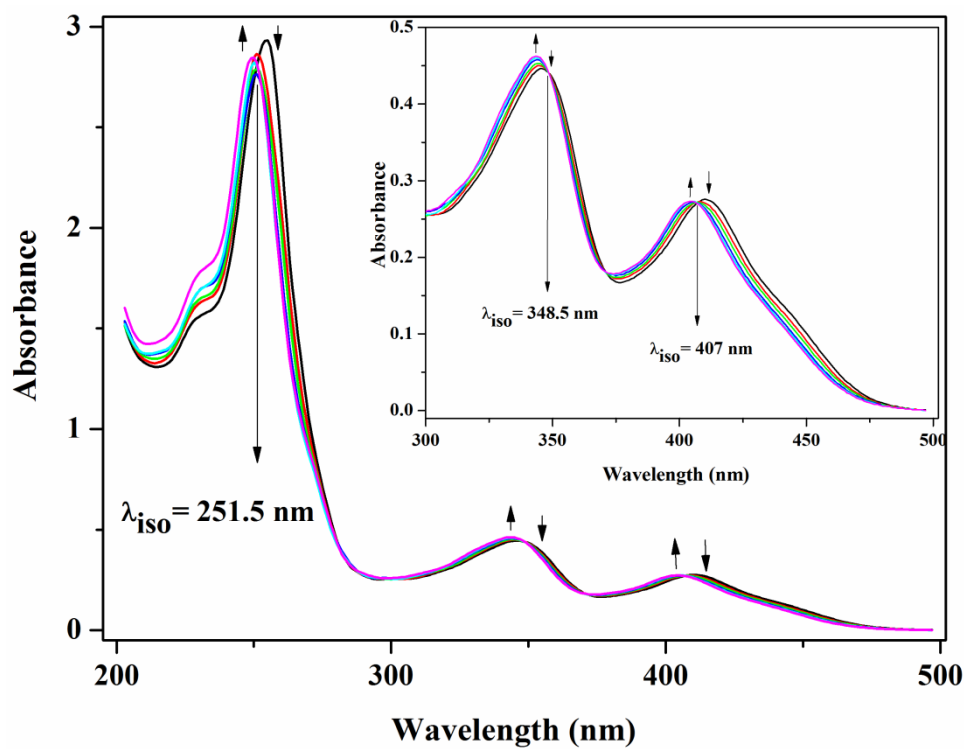

**Fig. S16** Spectrophotometric titration of  $5 \times 10^{-5}$  M acetonitrile solution of  $[\text{NiL}^{\text{en}}]$  by  $\text{KPF}_6$ .

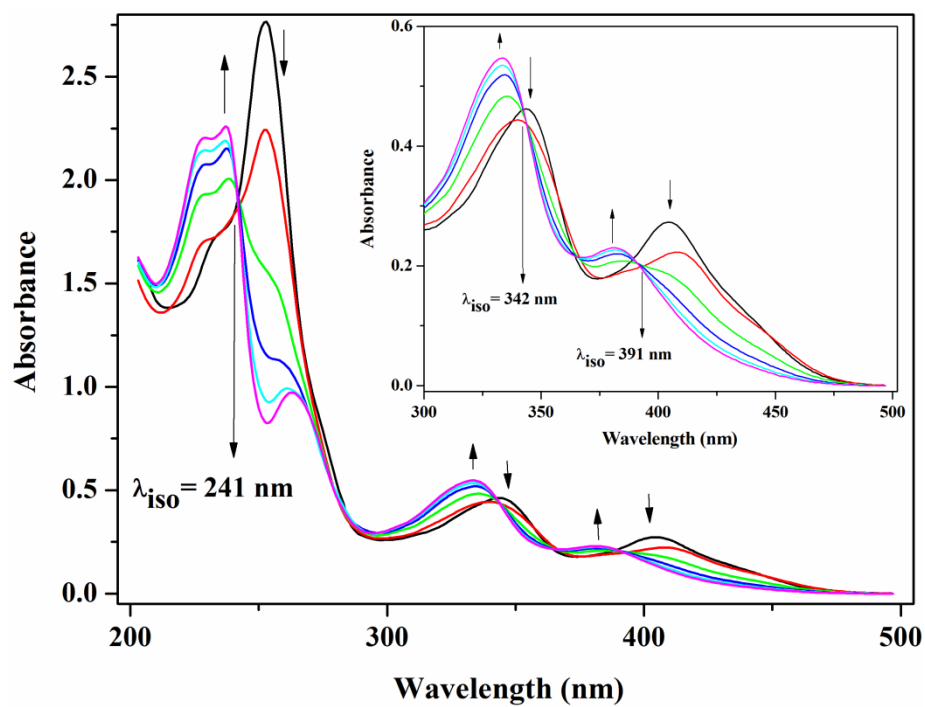

**Fig. S17** Spectrophotometric titration of  $5 \times 10^{-5}$  M acetonitrile solution of  $[\text{NiL}^{\text{en}}]$  by  $\text{Mg}(\text{ClO}_4)_2$ .

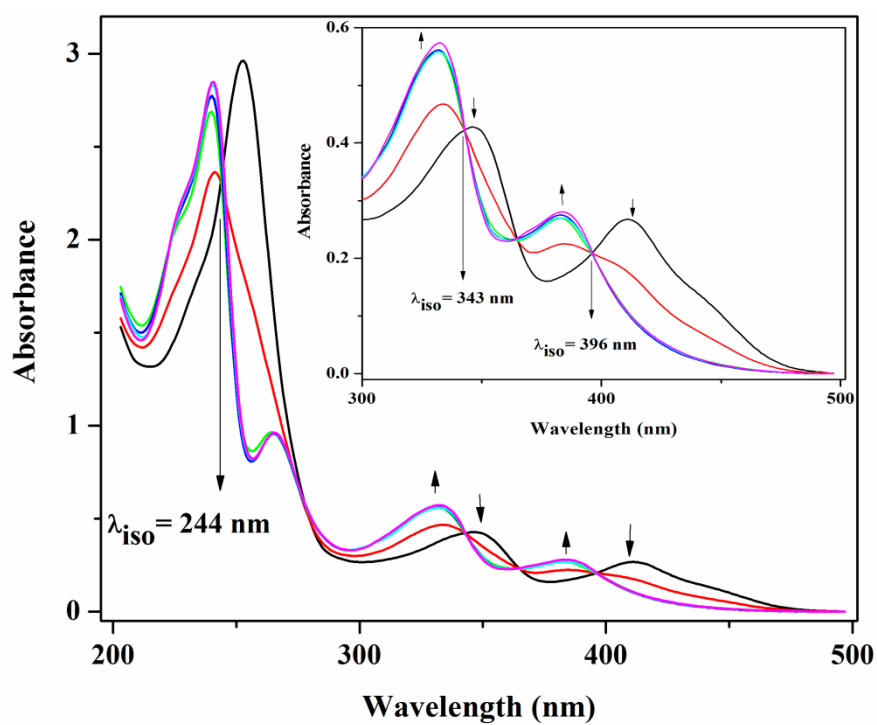

**Fig. S18** Spectrophotometric titration of  $5 \times 10^{-5}$  M acetonitrile solution of  $[\text{NiL}^{\text{en}}]$  by  $\text{Ca}(\text{ClO}_4)_2$ .

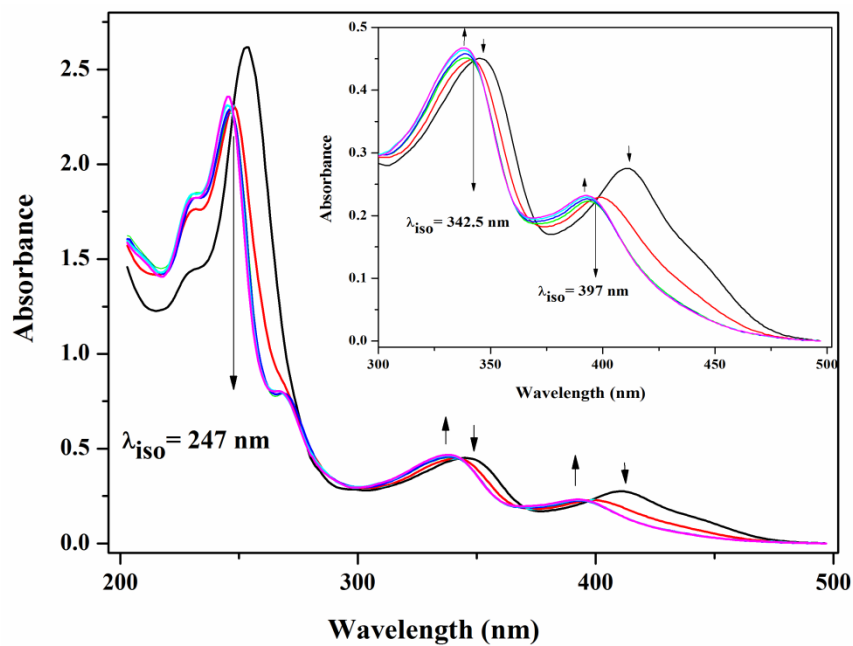

**Fig. S19** Spectrophotometric titration of  $5 \times 10^{-5} \text{ M}$  acetonitrile solution of  $[\text{NiL}^{\text{en}}]$  by  $\text{Ba}(\text{ClO}_4)_2$ .

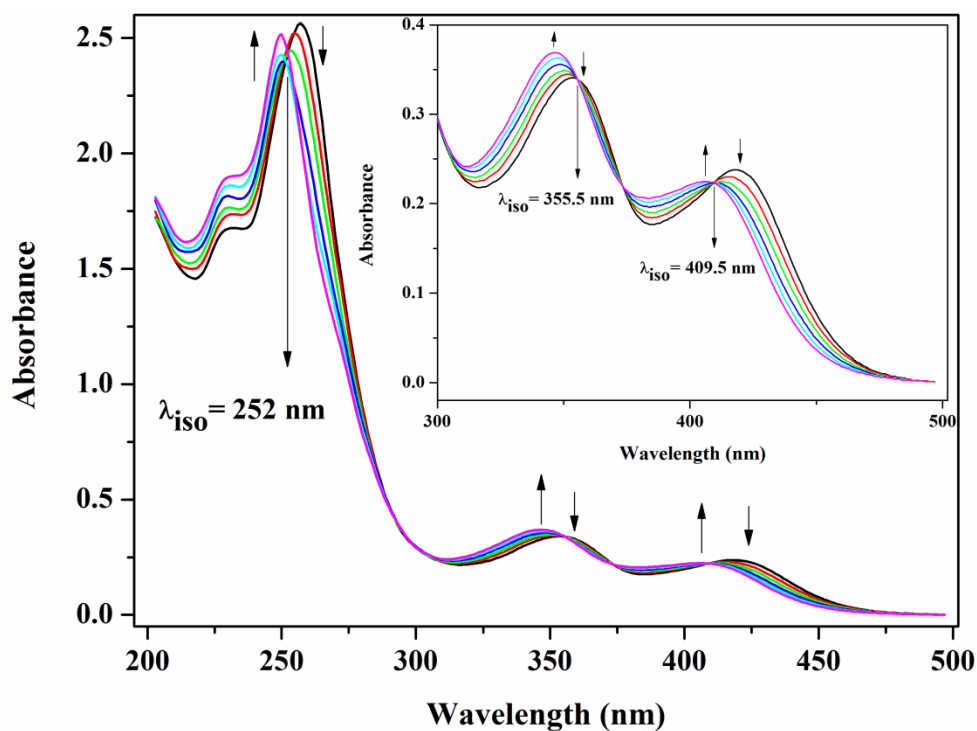

**Fig. S20** Spectrophotometric titration of  $5 \times 10^{-5} \text{ M}$  acetonitrile solution of  $[\text{NiL}^{\text{pn}}]$  by  $\text{LiClO}_4$ .

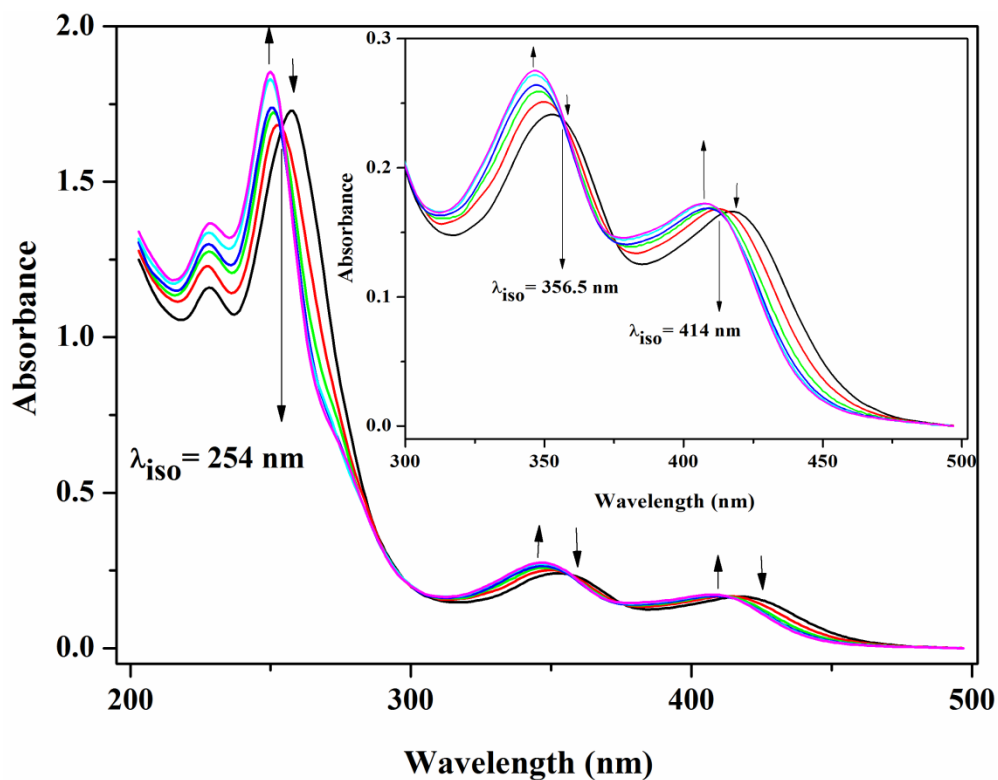

**Fig. S21** Spectrophotometric titration of  $5 \times 10^{-5}$  M acetonitrile solution of  $[\text{NiL}^{\text{pn}}]$  by  $\text{NaBF}_4$ .

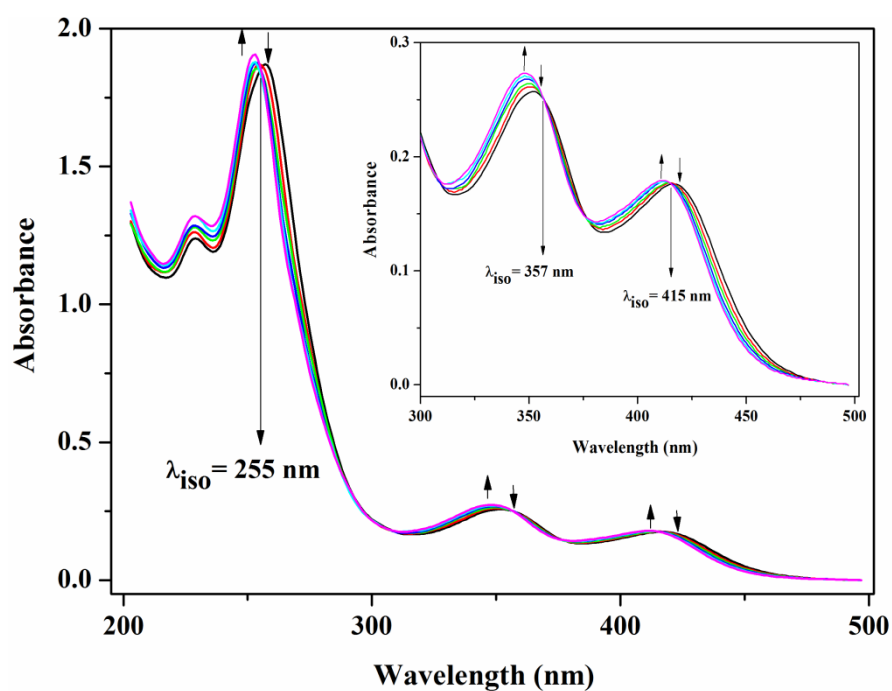

**Fig. S22** Spectrophotometric titration of  $5 \times 10^{-5}$  M acetonitrile solution of  $[\text{NiL}^{\text{pn}}]$  by  $\text{KPF}_6$ .

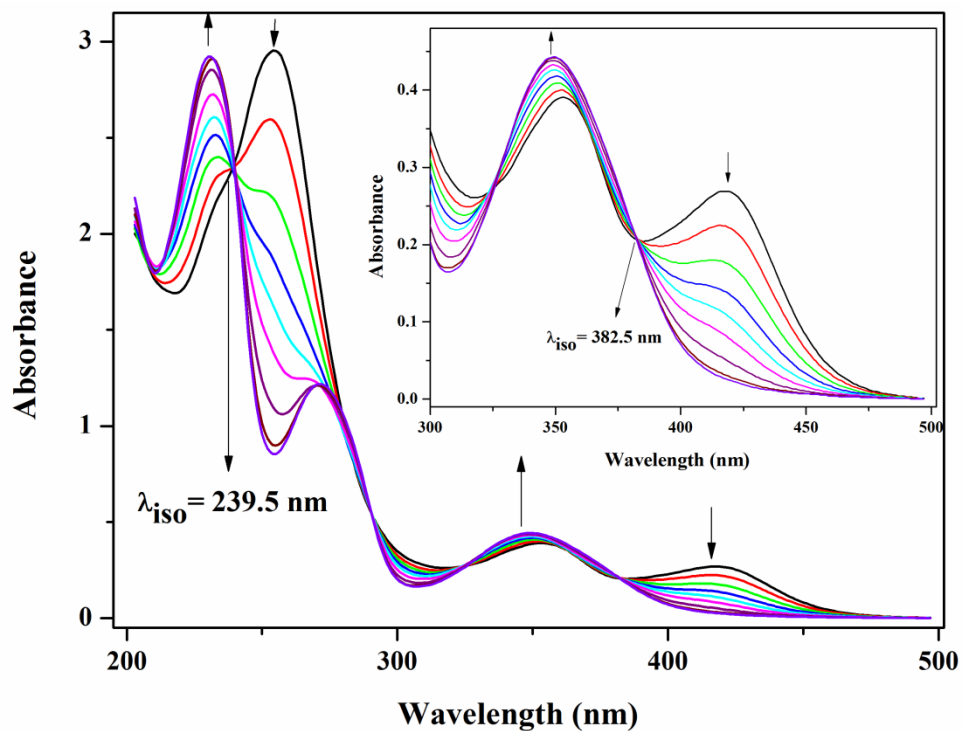

**Fig. S23** Spectrophotometric titration of  $5 \times 10^{-5}$  M acetonitrile solution of  $[\text{NiL}^{\text{Pn}}]$  by  $\text{Mg}(\text{ClO}_4)_2$ .

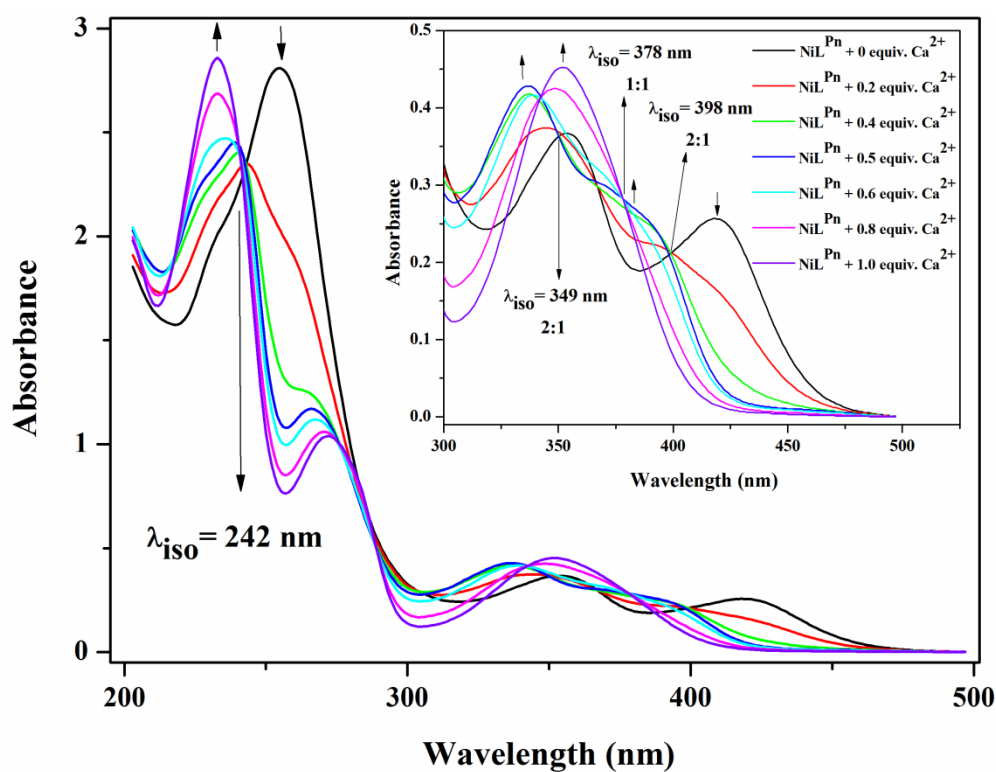

**Fig. S24** Spectrophotometric titration of  $5 \times 10^{-5}$  M acetonitrile solution of  $[\text{NiL}^{\text{Pn}}]$  by  $\text{Ca}(\text{ClO}_4)_2$ .

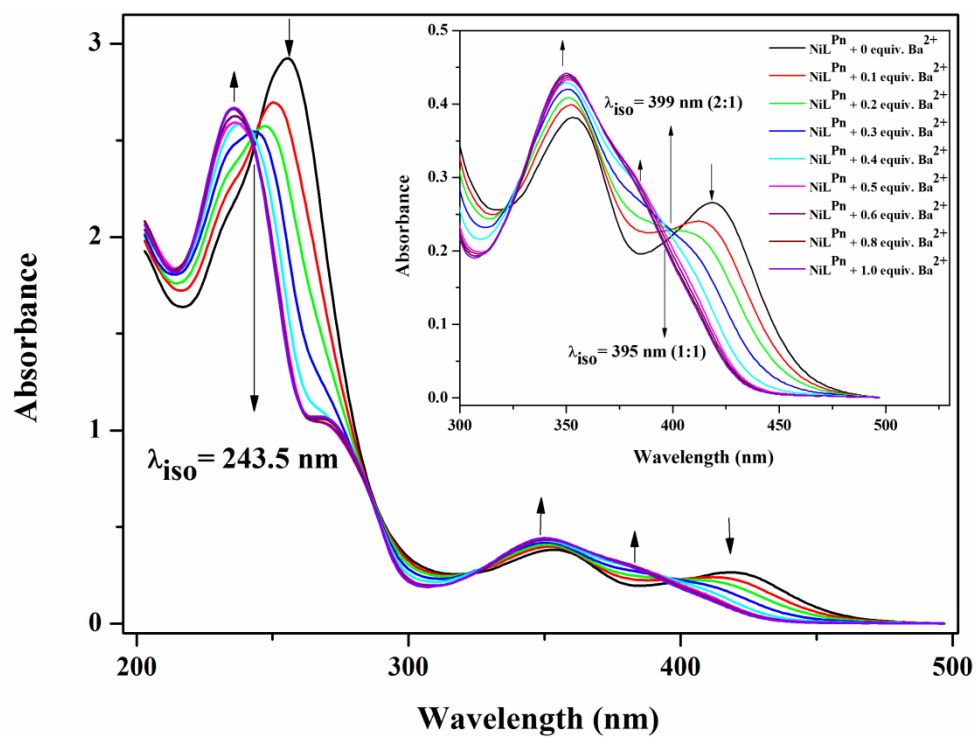

**Fig. S25** Spectrophotometric titration of  $5 \times 10^{-5}$  M acetonitrile solution of  $[\text{NiL}^{\text{Pn}}]$  by  $\text{Ba}(\text{ClO}_4)_2$ .

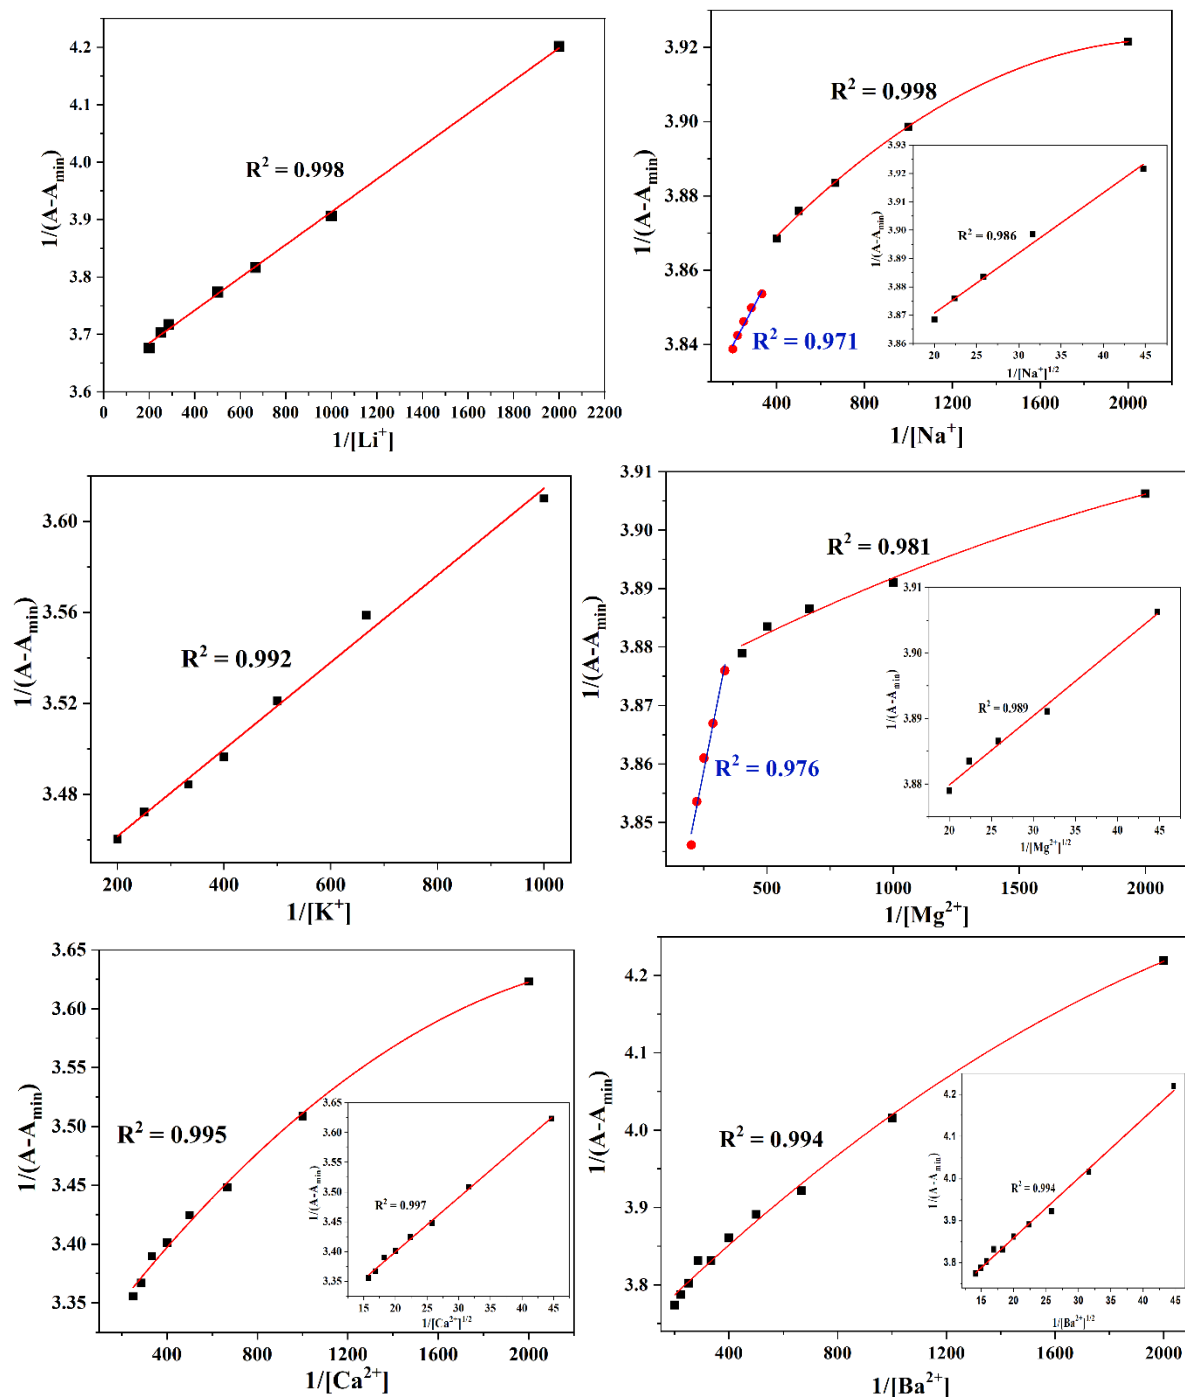

**Fig. S26** Benesi–Hildebrand plot for the associative interaction of  $[NiL^{en}]$  complex with respective metal ions in acetonitrile. Insert shows the inverse of absolute change in absorbance vs. the inverse of square root of metal ions concentration for the 2 : 1 ( $[NiL^{en}] : M^{n+}$ ) cases.

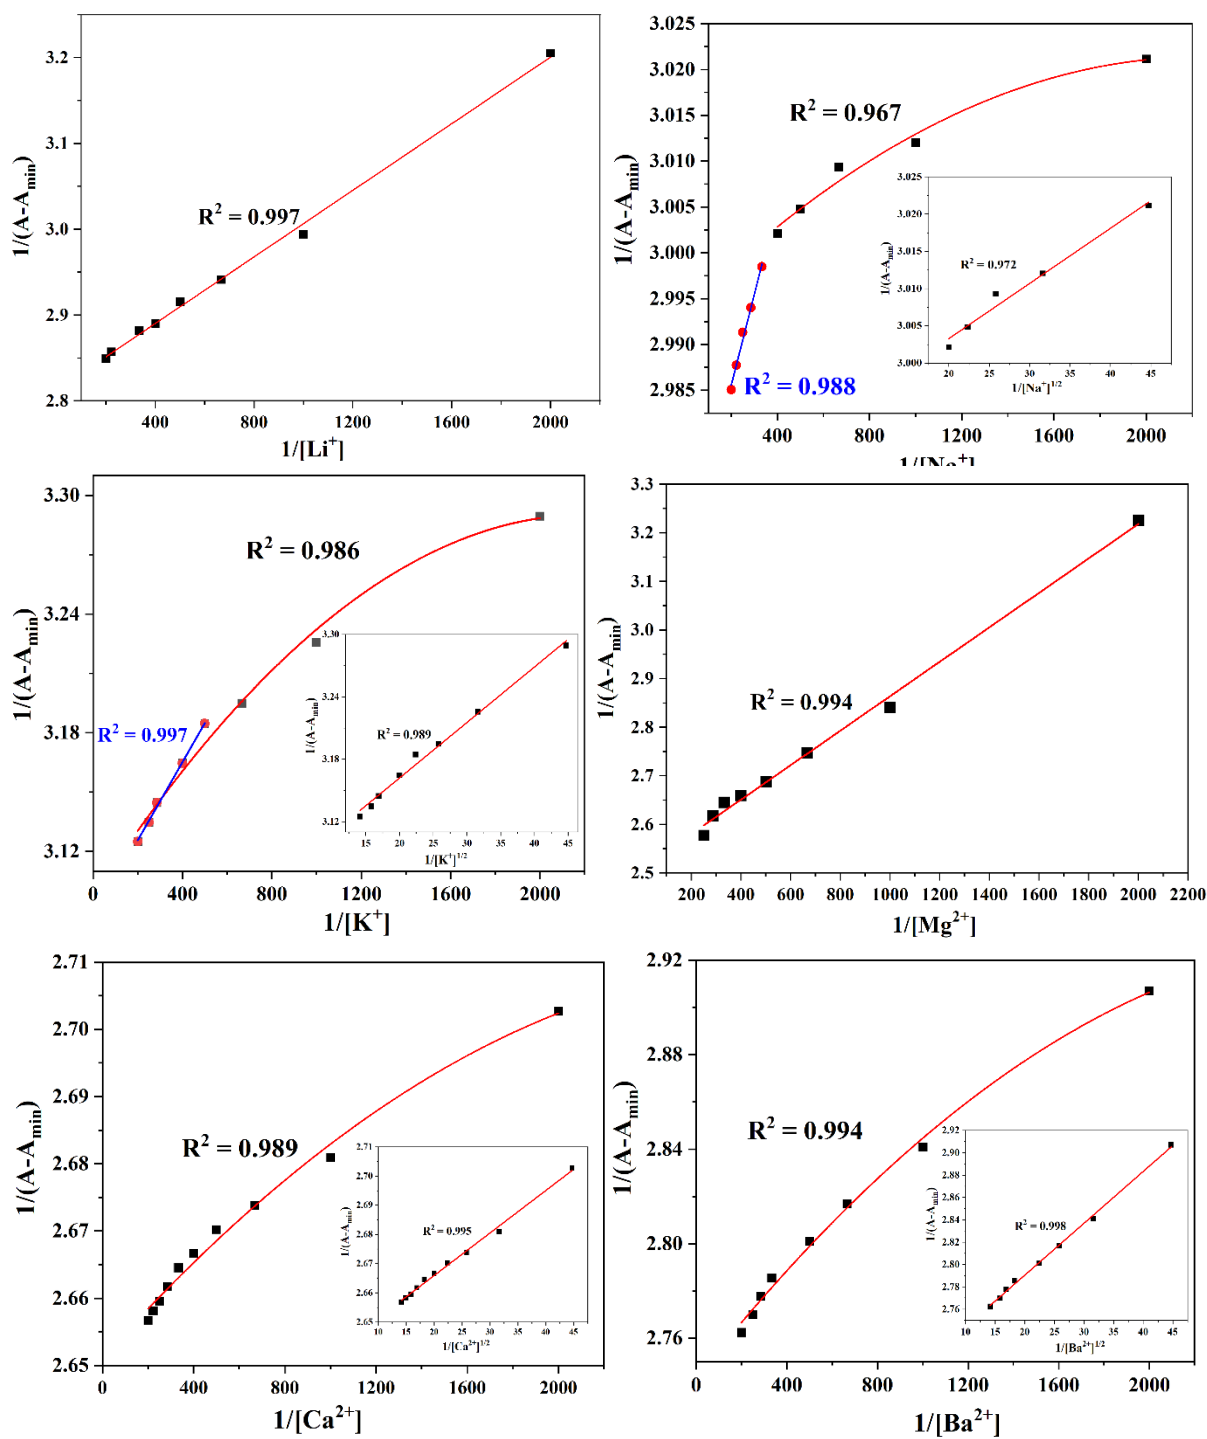

**Fig. S27** Benesi–Hildebrand plot for the associative interaction of  $[NiL^{pn}]$  complex with respective metal ions in acetonitrile. Insert shows the inverse of absolute change in absorbance vs. the inverse of square root of metal ions concentration for the 2 : 1 ( $[NiL^{pn}] : M^{n+}$ ) cases.



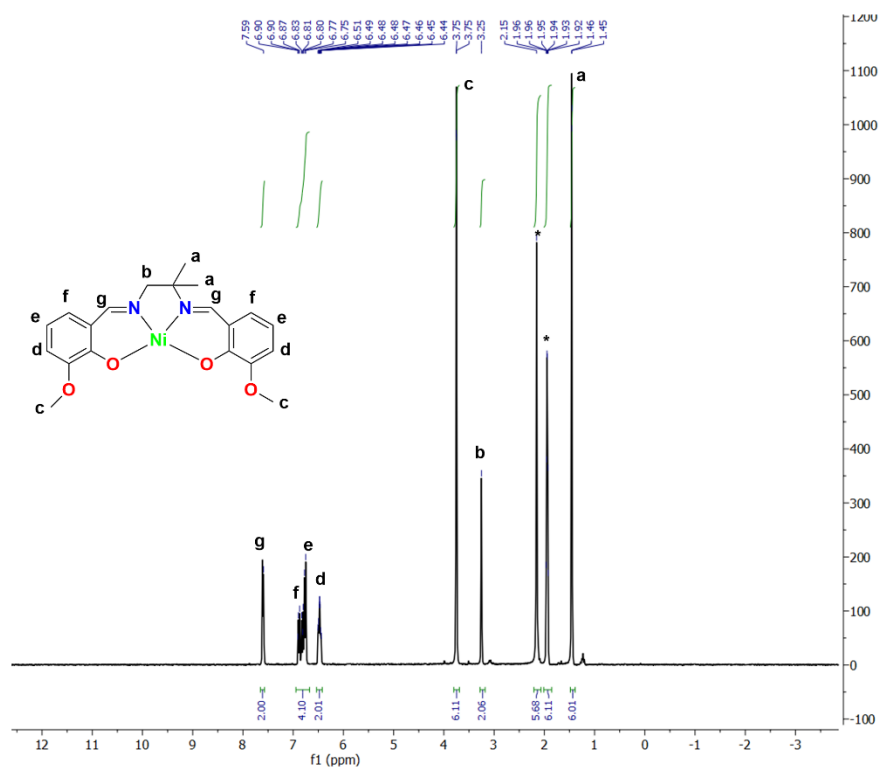

**Fig. S28**  $^1\text{H-NMR}$  spectrum of  $\text{NiL}^{\text{en}}$  in  $\text{CD}_3\text{CN}$ .

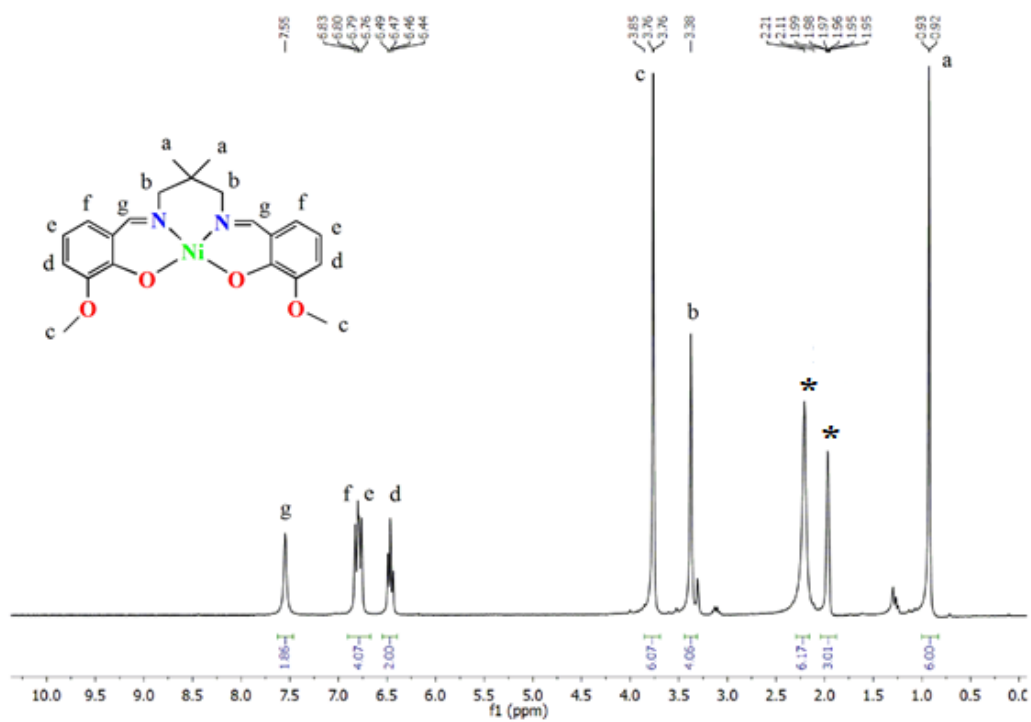

**Fig. S29**  $^1\text{H-NMR}$  spectrum of  $\text{NiL}^{\text{pn}}$  in  $\text{CD}_3\text{CN}$ .

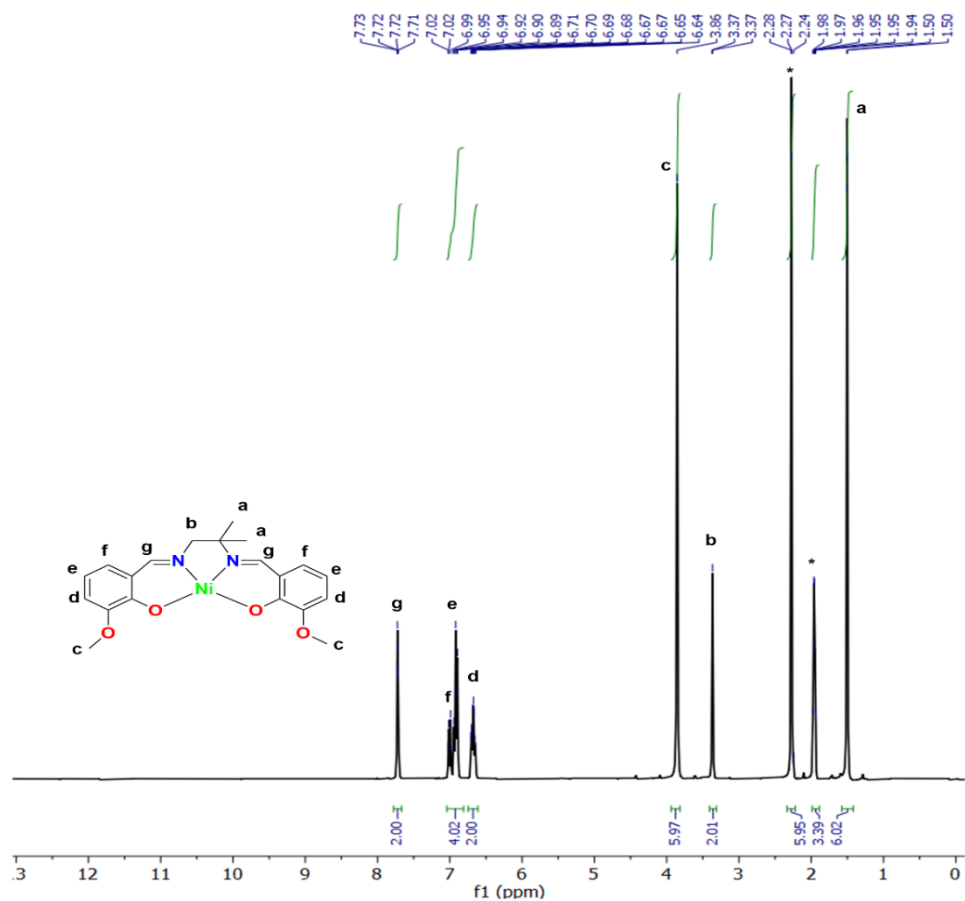

**Fig. S30** <sup>1</sup>H-NMR spectrum of NiL<sup>n</sup> in presence of LiClO<sub>4</sub> in CD<sub>3</sub>CN.

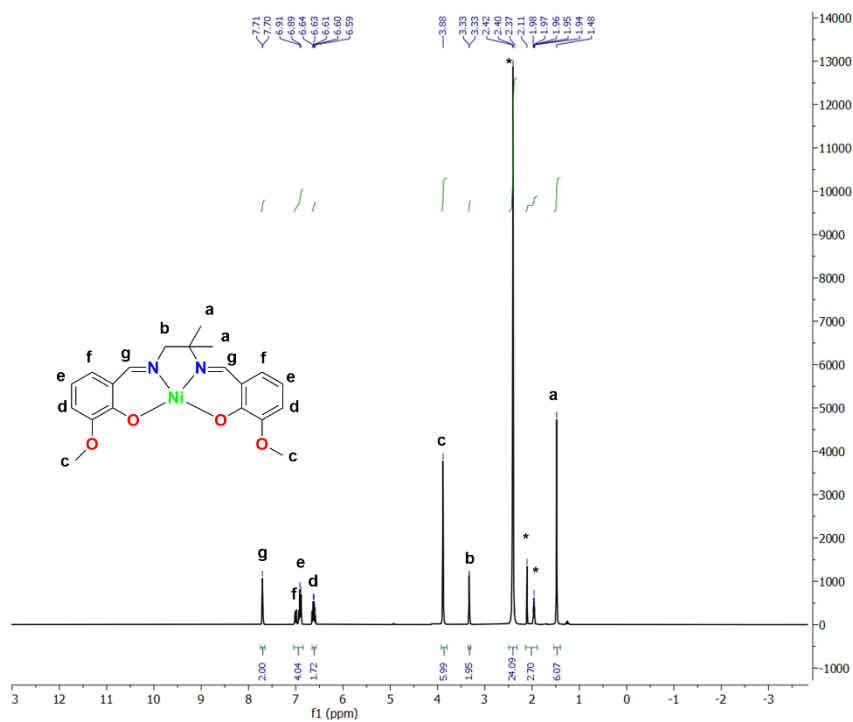

**Fig. S31** <sup>1</sup>H-NMR spectrum of NiL<sup>n</sup> in presence of NaBF<sub>4</sub> in CD<sub>3</sub>CN.

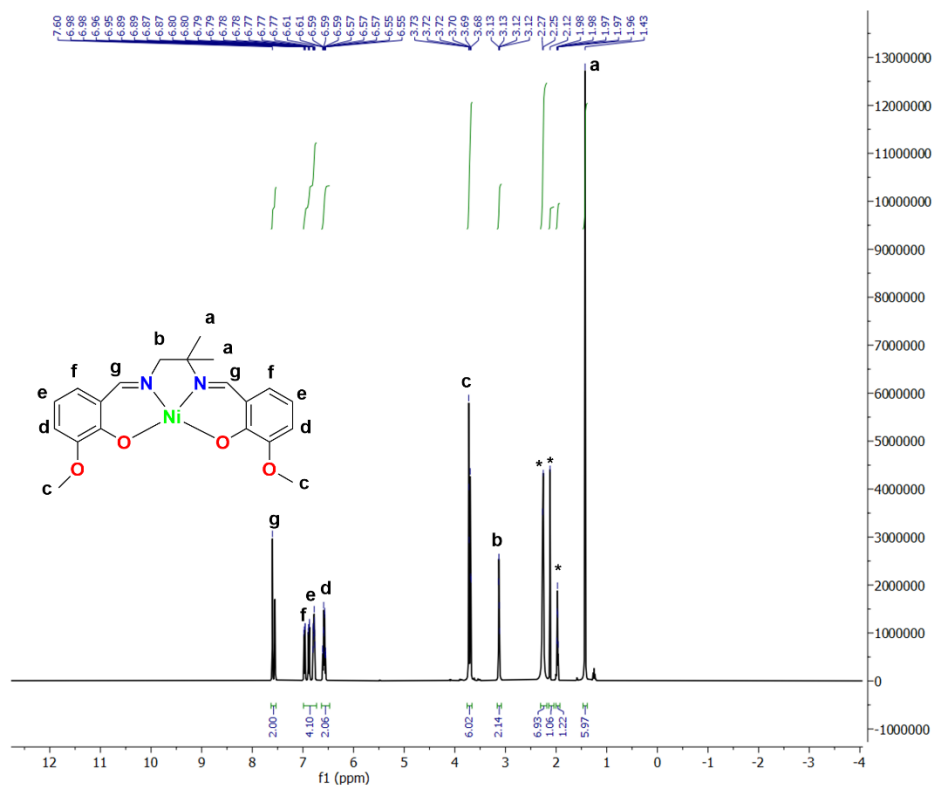

**Fig. S32**  $^1H$ -NMR spectrum of  $NiL^n$  in presence of  $KPF_6$  in  $CD_3CN$ .

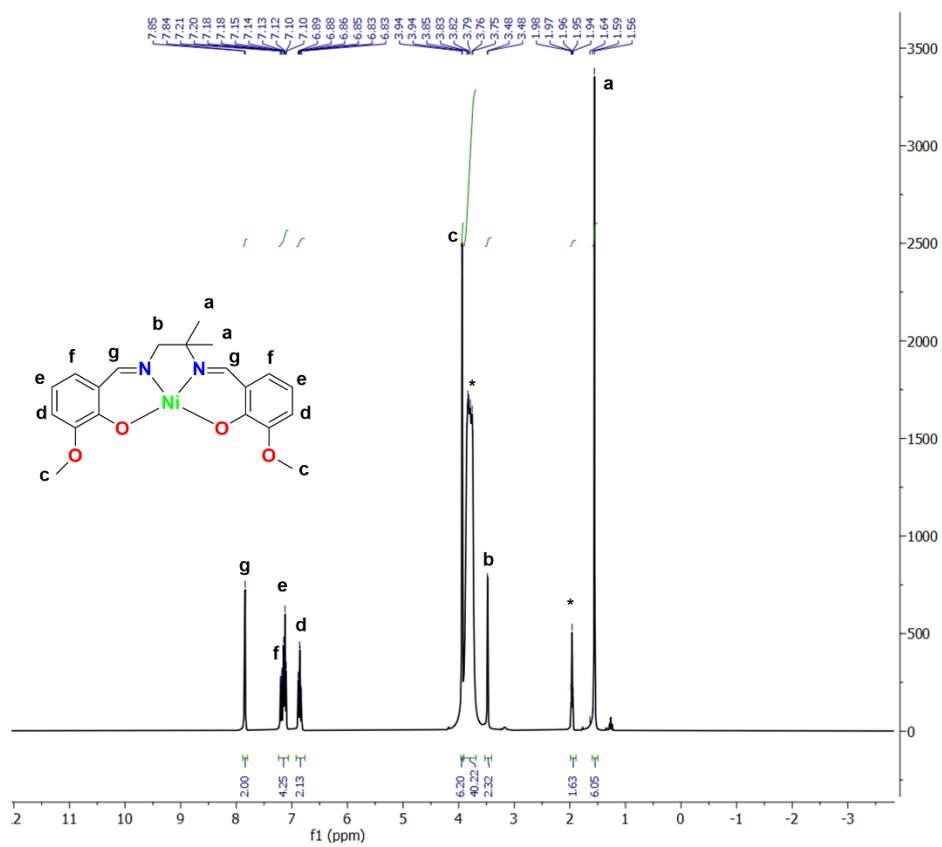

**Fig. S33**  $^1H$ -NMR spectrum of  $NiL^n$  in presence of  $Mg(ClO_4)_2$  in  $CD_3CN$ .

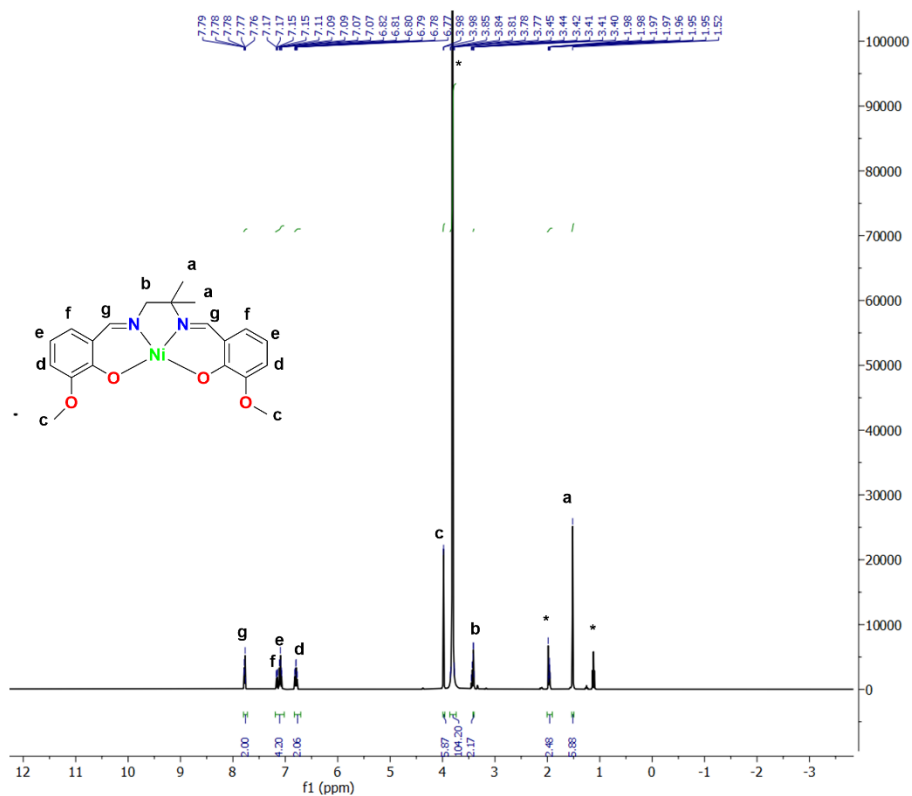

**Fig. S34** <sup>1</sup>H-NMR spectrum of NiL<sup>n</sup> in presence of Ca(ClO<sub>4</sub>)<sub>2</sub> in CD<sub>3</sub>CN.

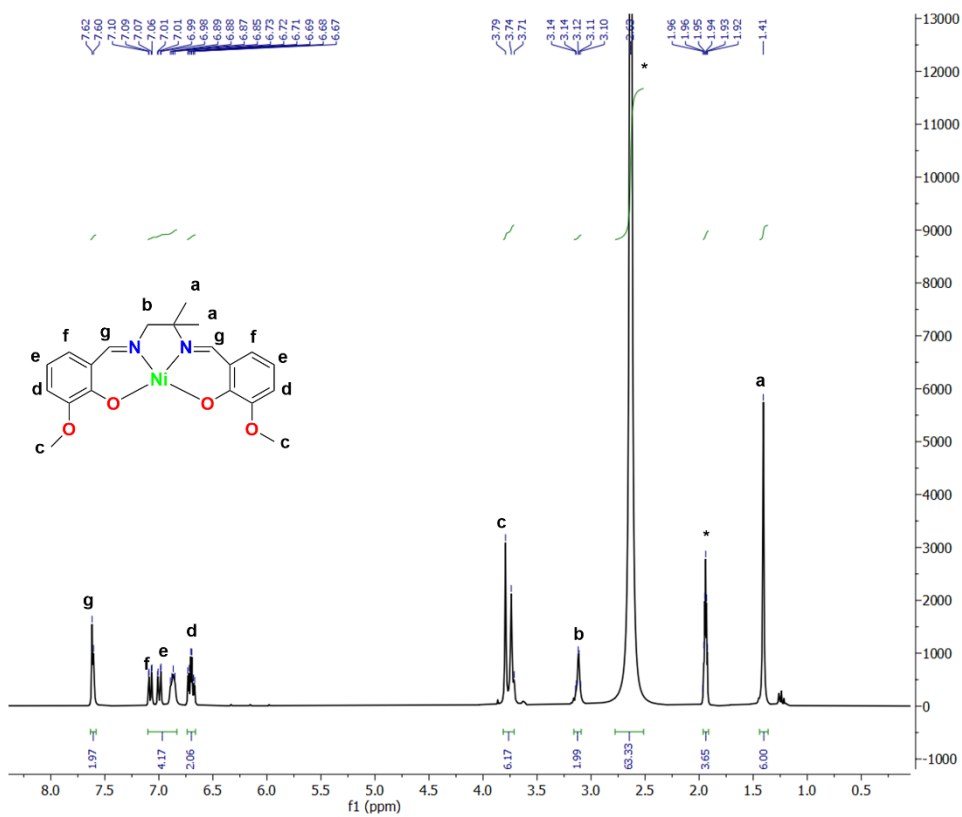

**Fig. S35** <sup>1</sup>H-NMR spectrum of NiL<sup>n</sup> in presence of Ba(ClO<sub>4</sub>)<sub>2</sub> in CD<sub>3</sub>CN.

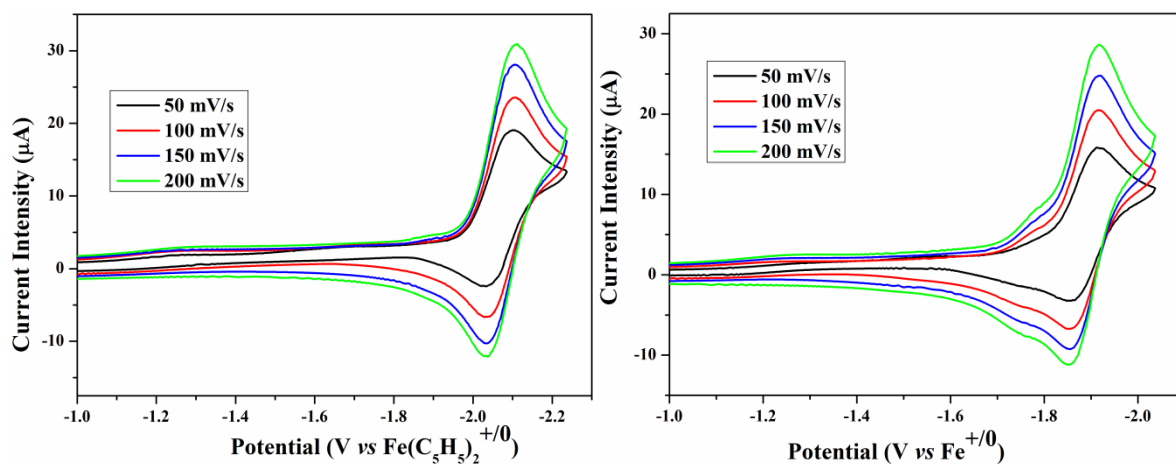

**Fig. S36** Scan rate dependent cyclic voltammograms of  $\text{NiL}^{\text{en}}$  (left) and  $\text{NiL}^{\text{n}}$  (right) in acetonitrile.

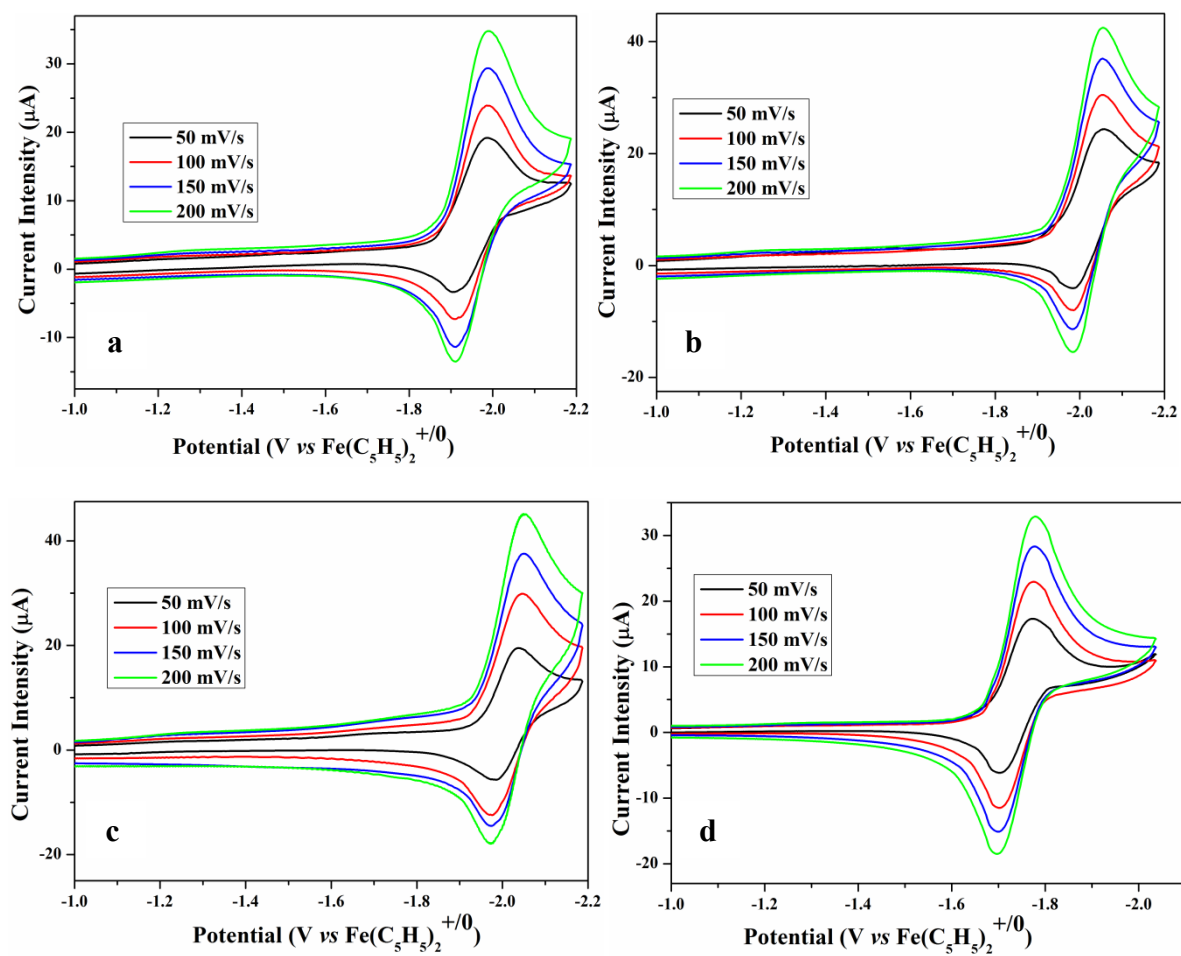

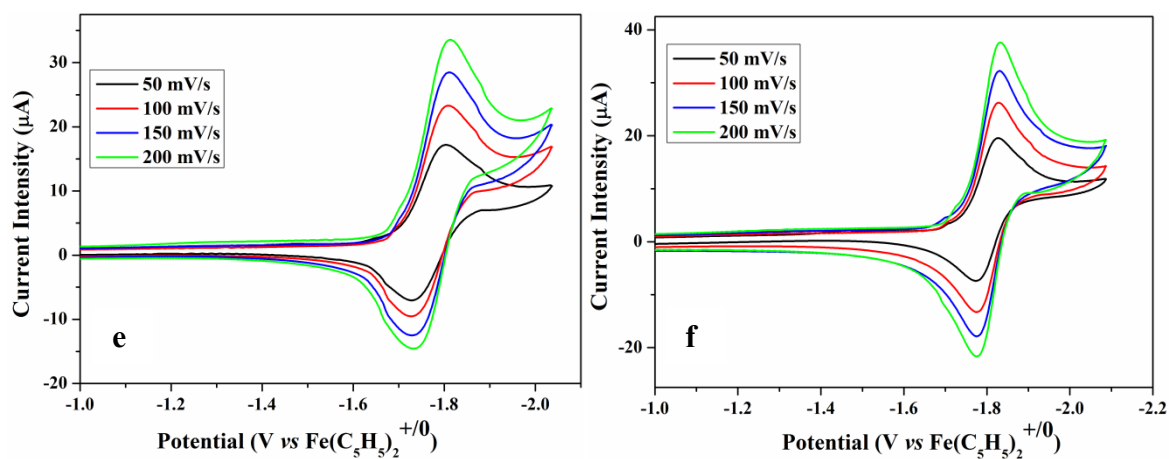

**Fig. S37** Scan rate dependent cyclic voltammograms of  $\text{NiL}^{\text{en}}$  in presence of equivalent amount of  $\text{Li}^+$  (a),  $\text{Na}^+$  (b),  $\text{K}^+$  (c),  $\text{Mg}^{2+}$  (d),  $\text{Ca}^{2+}$  (e) and  $\text{Ba}^{2+}$  (f) in acetonitrile.

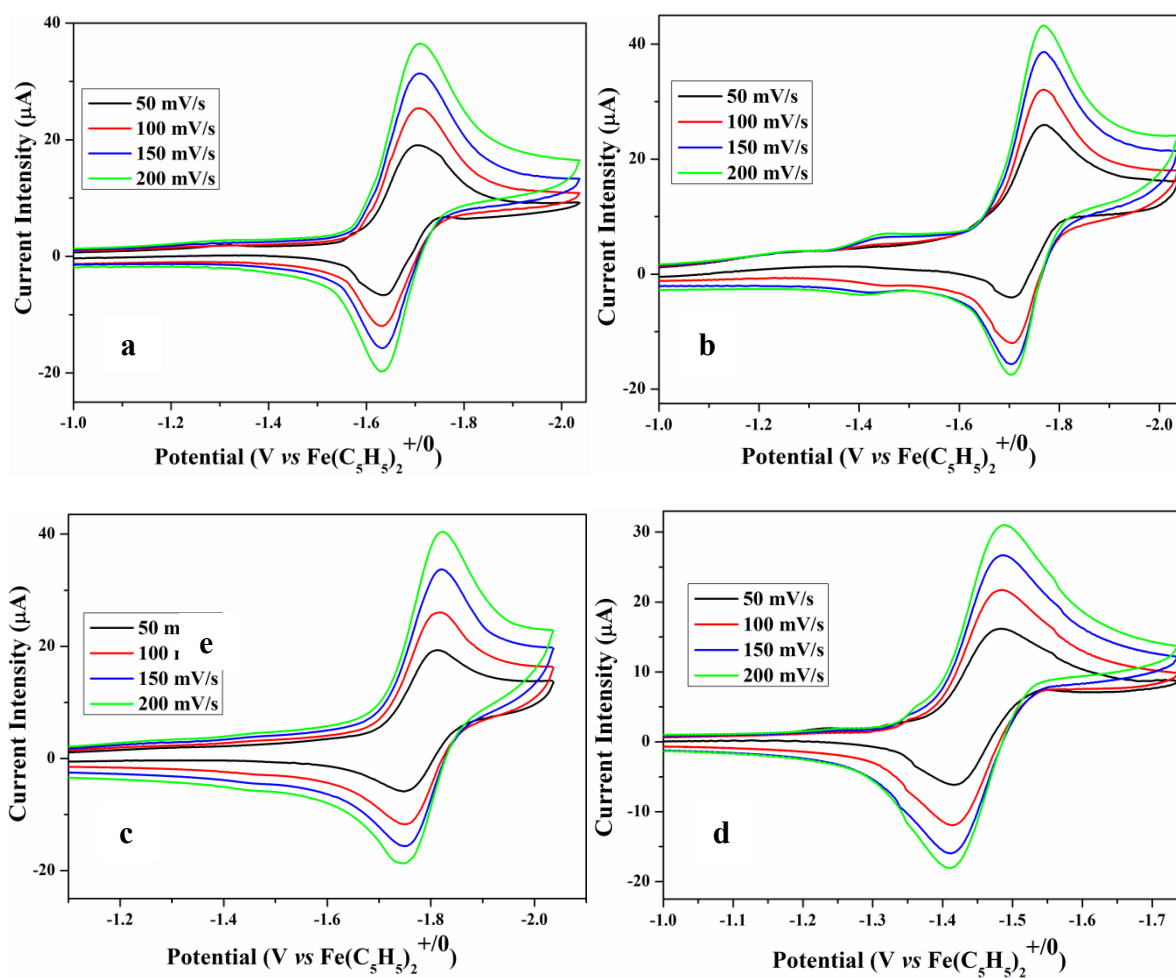

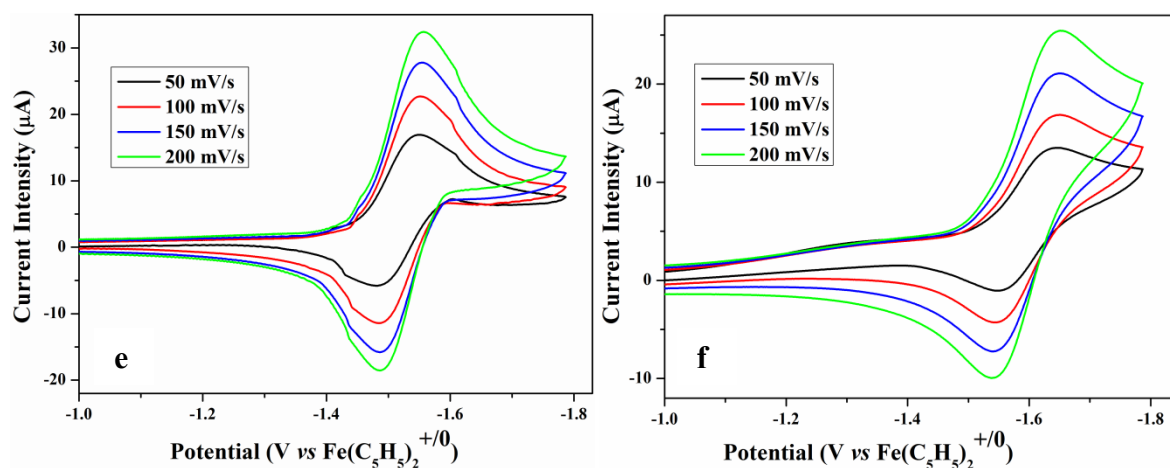

**Fig. S38** Scan rate dependent cyclic voltammograms of  $\text{NiL}^{\text{pn}}$  in presence of equivalent amount of  $\text{Li}^+$  (a),  $\text{Na}^+$  (b),  $\text{K}^+$  (c),  $\text{Mg}^{2+}$  (d),  $\text{Ca}^{2+}$  (e) and  $\text{Ba}^{2+}$  (f) in acetonitrile.

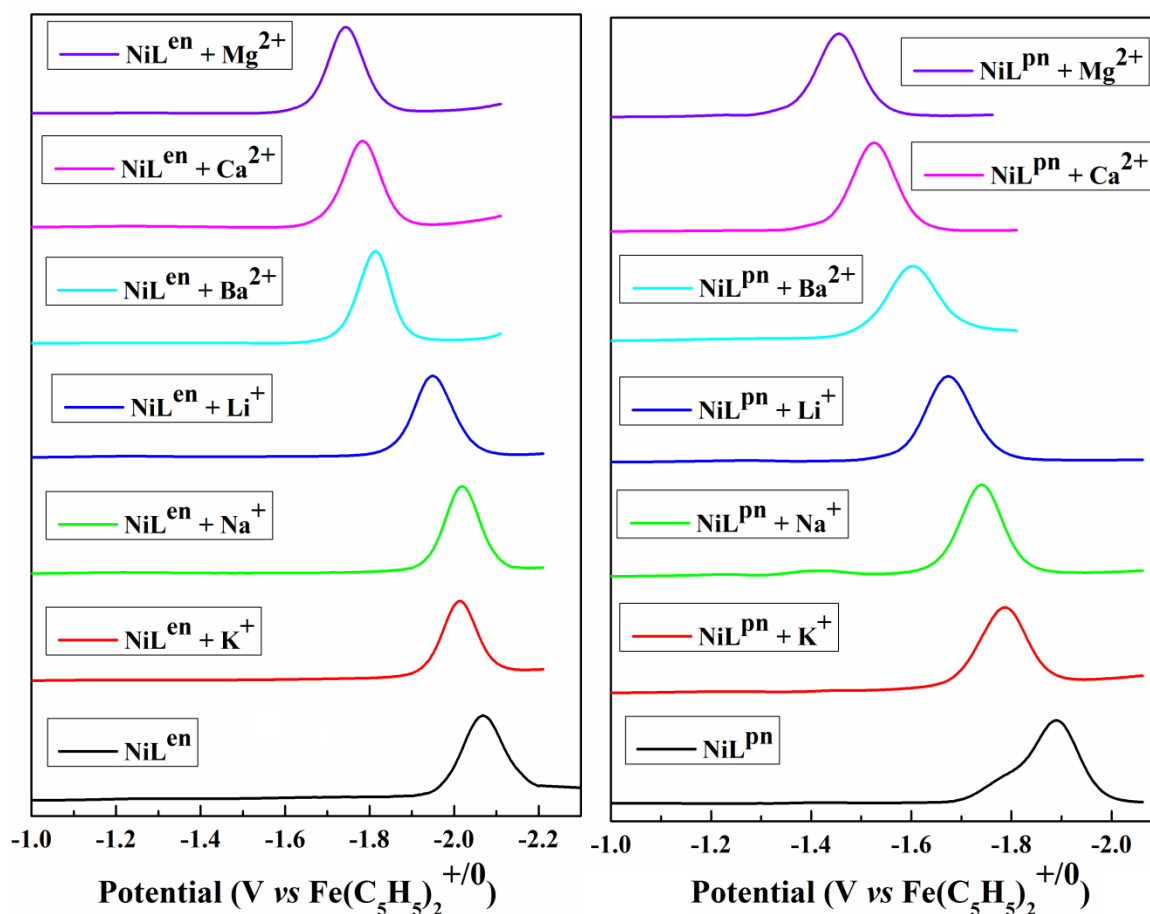

**Fig. S39** Differential pulse voltammogram of  $[\text{NiL}^{\text{en}}]$  (left) and  $[\text{NiL}^{\text{pn}}]$  (right) in presence of equivalents amount of each of metal ions,  $\text{Li}^+$ ,  $\text{Na}^+$ ,  $\text{K}^+$ ,  $\text{Mg}^{2+}$ ,  $\text{Ca}^{2+}$  and  $\text{Ba}^{2+}$  at 20 mV/s scan rate in acetonitrile.

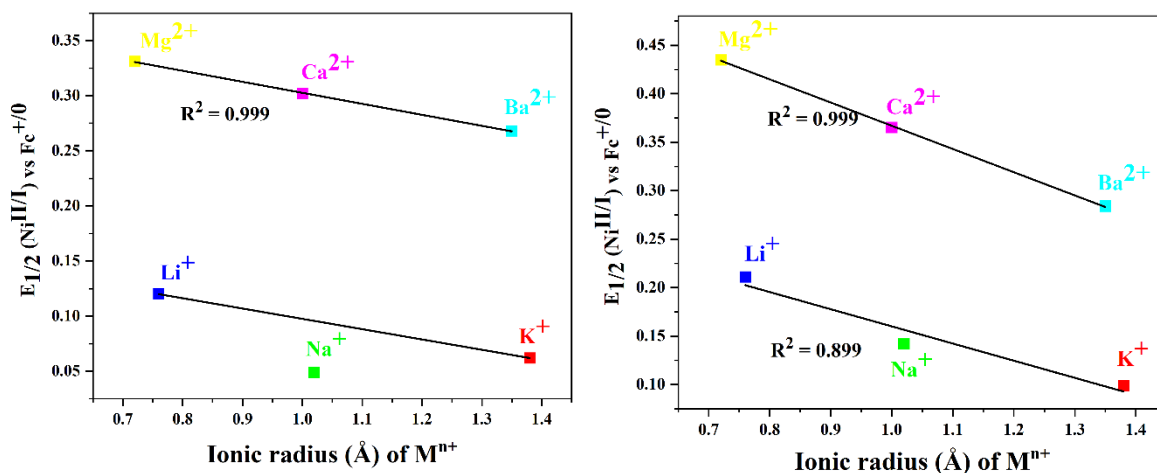

**Fig. S40.** Dependence of  $E_{1/2}$  of Ni(II/I) couple on the ionic radius of the corresponding metal ions (left panel,  $[\text{NiL}^{\text{en}}]$ ) and (right panel,  $[\text{NiL}^{\text{pn}}]$ ).

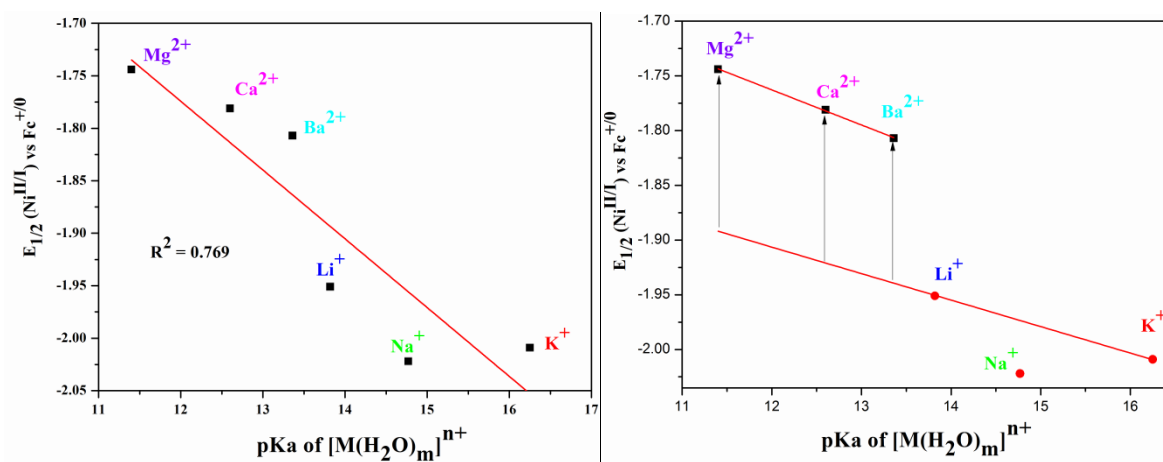

**Fig. S41.** Dependence of  $E_{1/2}$  of Ni(II/I) couple on the Lewis acidity (pKa) of the corresponding  $\text{M}(\text{aqua})^{n+}$  ions (left) and excess amount of shift by the bi-positive metal ions (right) for  $\text{NiL}^{\text{en}}$ .

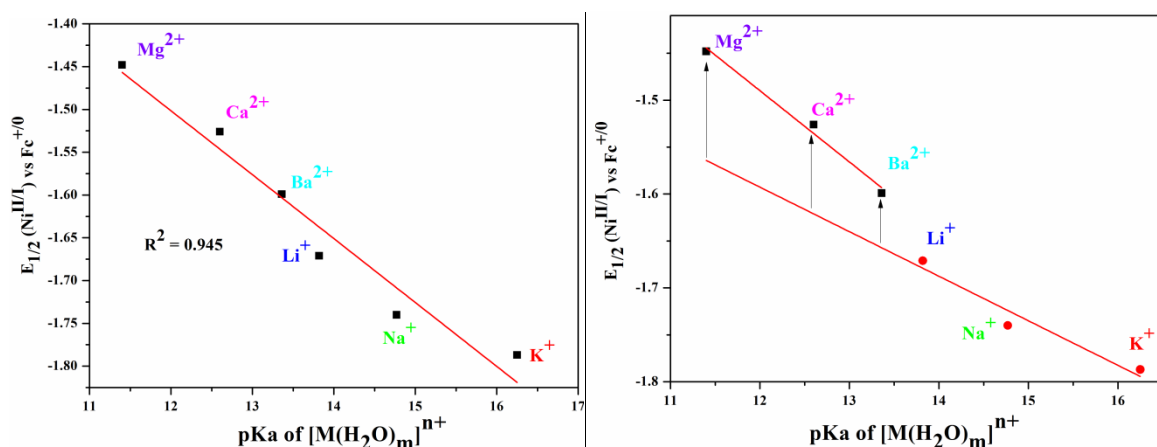

**Fig. S42.** Dependence of  $E_{1/2}$  of Ni(II/I) couple on the Lewis acidity (pKa) of the corresponding  $\text{M}(\text{aqua})^{n+}$  ions (left) and excess amount of shift by the bi-positive metal ions (right) for  $\text{NiL}^{\text{pn}}$ .



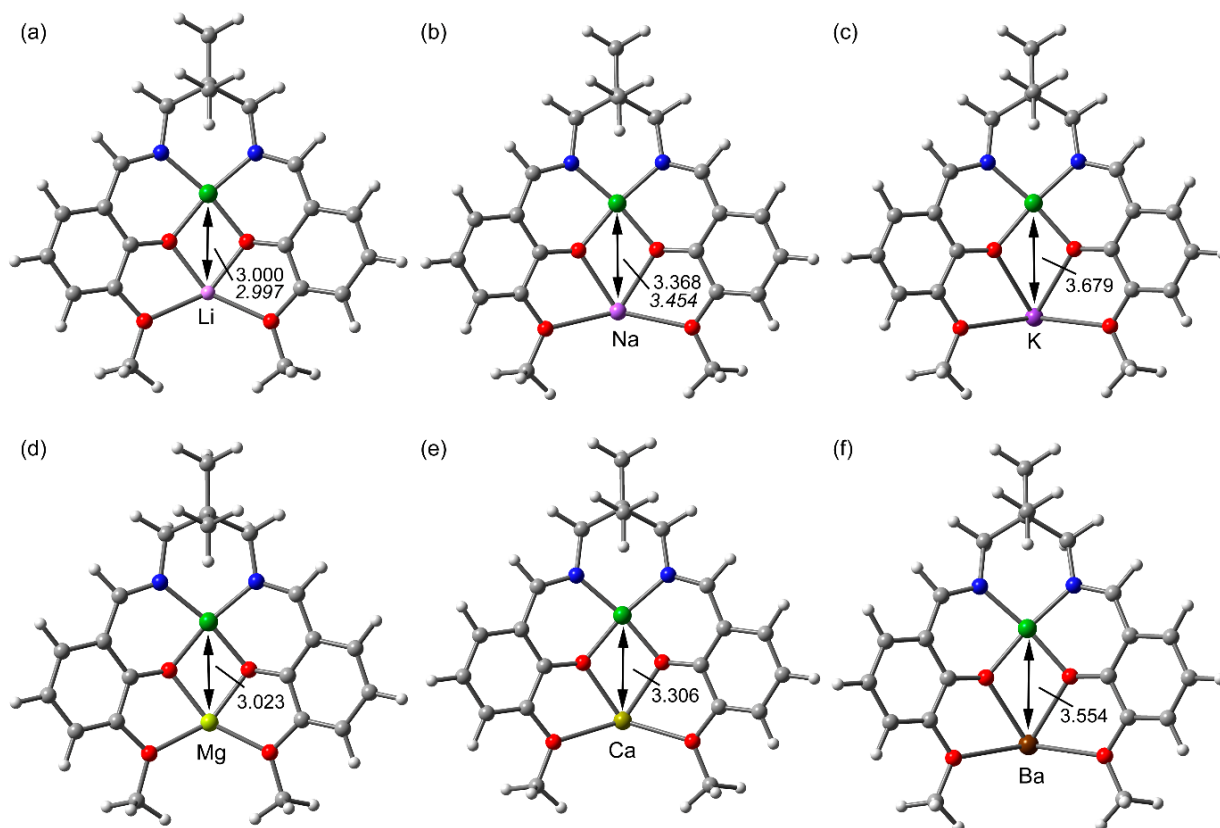

**Fig. S43.** (a-f) RI-BP86-D3/def2-TZVP optimized geometries of the NiL<sup>np</sup> series of complexes used herein. Distances in Å. Values in *italics* corresponds to the experimental distances.

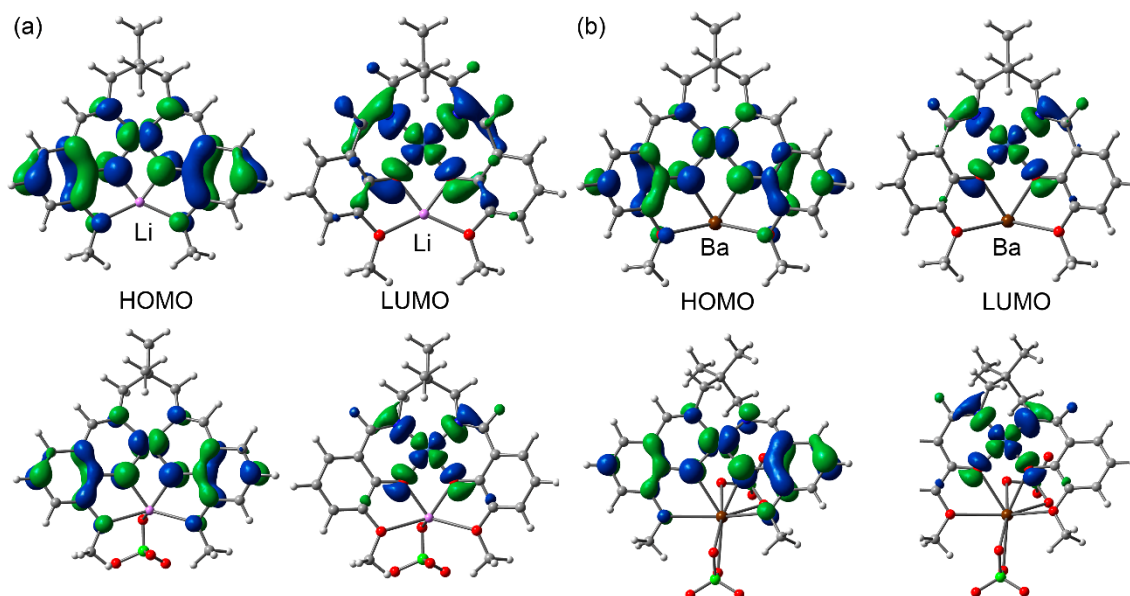

**Fig. S44.** Frontier orbital of Li (a) and Ba (b) NiL<sup>pn</sup> complexes with (bottom) and without (top) the presence of the counterions (perchlorate anions)

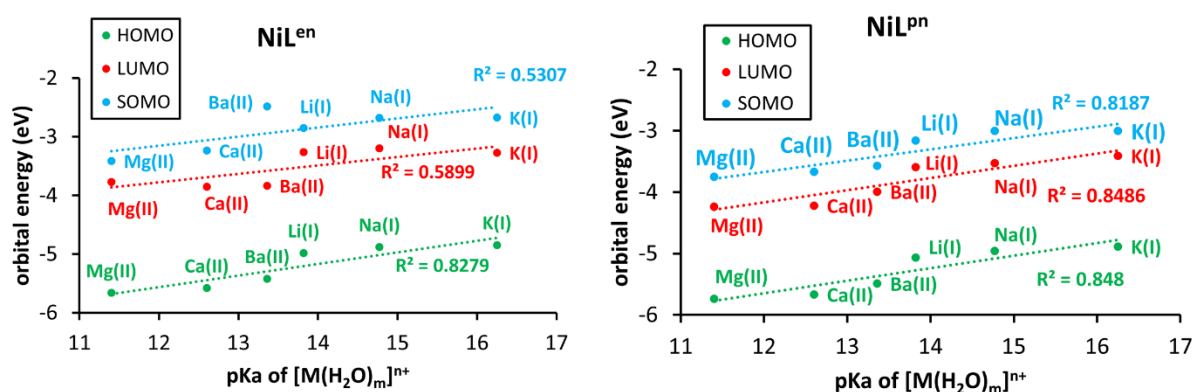

**Fig. S45.** Dependence of orbital energies of Ni(II/I) couple on the Lewis acidity (pKa) of the corresponding M(aqua)<sup>n+</sup> ions for NiL<sup>en</sup> (left) and NiL<sup>pn</sup> (right) complexes.

**Table S1.** Bond parameters of complexes **1** and **2**.

| Bond lengths (Å)                                                                                                           |           |            |                |           |          |
|----------------------------------------------------------------------------------------------------------------------------|-----------|------------|----------------|-----------|----------|
|                                                                                                                            | <b>1</b>  | <b>2</b>   |                | <b>1</b>  | <b>2</b> |
| Ni1 – O11                                                                                                                  | 1.840(5)  | 1.863(2)   | Li1 – OC       | 1.954(15) | 2.199(8) |
| Ni1 – OA                                                                                                                   | 1.826(6)  | 1.841(2)   | Li1 – O11      | 2.009(16) | 2.054(6) |
| Ni1 – N19                                                                                                                  | 1.826(7)  | 1.902(3)   | Li1 – OA       | 2.072(14) | 1.966(6) |
| Ni1 – NB                                                                                                                   | 1.885(6)  | 1.893(3)   | Li1 – O41      | 2.540(10) | 2.104(6) |
| Li1 – O1                                                                                                                   | 1.978(14) | 1.907(6)   |                |           |          |
| Bond angles (°)                                                                                                            |           |            |                |           |          |
| O11 – Ni1 – OA                                                                                                             | 83.1(2)   | 82.04(9)   | O11 – Li1 – OC | 125.5(7)  | 139.5(3) |
| O11 – Ni1 – N19                                                                                                            | 96.9(2)   | 90.54(10)  | OA – Li1 – O41 | 140.7(7)  | 133.5(3) |
| O11 – Ni1 – NB                                                                                                             | 176.5(3)  | 173.94(11) | OA – Li1 – OC  | 121.2(7)  | 75.7(3)  |
| OA – Ni1 – N19                                                                                                             | 178.6(2)  | 170.79(10) | O41 – Li1 – OC | 82.8(5)   | 105.6(3) |
| OA – Ni1 – NB                                                                                                              | 93.8(3)   | 91.98(11)  | O1 – Li1 – O11 | 113.5(7)  | 119.8(4) |
| N19 – Ni1 – NB                                                                                                             | 86.3(3)   | 95.31(11)  | O1 – Li1 – OA  | 106.9(6)  | 123.6(3) |
| O11 – Li1 – OA                                                                                                             | 73.2(5)   | 74.40(19)  | O1 – Li1 – O41 | 89.7(5)   | 102.4(3) |
| O11 – Li1 – O41                                                                                                            | 67.6(4)   | 77.1(2)    | O1 – Li1 – OC  | 110.8(8)  | 99.4(3)  |
| A = 30 for <b>1</b> and 31 for <b>2</b> , B = 22 for <b>1</b> and 23 for <b>2</b> , C = 2 for <b>1</b> and 51 for <b>2</b> |           |            |                |           |          |

**Table S2.** SHAPE analysis for the sodium centre in complex **3** (the lowest values are indicated in bold).

| Geometry                                   | Symmetry | <b>3</b>     |
|--------------------------------------------|----------|--------------|
| Octagon                                    | D8h      | 30.908       |
| heptagonal pyramid                         | C7v      | 25.221       |
| Hexagonal bipyramid                        | D6h      | 10.560       |
| Cube                                       | Oh       | 7.205        |
| Square antiprism                           | D4d      | 6.066        |
| Triangular dodecahedron                    | D2d      | 5.029        |
| Johnson gyrobifastigium J26                | D2d      | 10.491       |
| Johnson elongated triangular bipyramid J14 | D3h      | 24.341       |
| Biaugmented trigonal prism J50             | C2v      | 5.607        |
| <b>Biaugmented trigonal prism</b>          | C2v      | <b>4.688</b> |
| Snub diphenoid J84                         | D2d      | 6.923        |
| Triakis tetrahedron                        | Td       | 7.954        |
| Elongated trigonal bipyramid               | D3h      | 18.304       |

**Table S3.** SHAPE analysis for the barium centre in complex **4** (the lowest values are indicated in bold).

| Geometry                                | Symmetry | <b>4</b>     |
|-----------------------------------------|----------|--------------|
| Decagon                                 | D10h     | 29.020       |
| Enneagonal pyramid                      | C9v      | 25.215       |
| Octagonal bipyramid                     | D8h      | 14.570       |
| Pentagonal prism                        | D5h      | 7.687        |
| <b>Pentagonal antiprism</b>             | D5d      | <b>2.497</b> |
| Bicapped cube J15                       | D4h      | 9.176        |
| Bicapped square antiprism J17           | D4d      | 12.123       |
| Metabidiminished icosahedron J62        | C2v      | 6.112        |
| Augmented tridiminished icosahedron J64 | C3v      | 16.085       |
| Sphenocorona J87                        | C2v      | 12.192       |
| Staggered Dodecahedron (2:6:2)          | D2       | 5.348        |
| Tetradecahedron (2:6:2)                 | C2v      | 7.687        |
| Hexadecahedron (2:6:2) or (1:4:4:1)     | D4h      | 6.204        |

**Table S4.** Bond lengths of complexes **3** and **4**.

| Bond lengths (Å) |
|------------------|
|------------------|

|                                         | <b>3</b> | <b>4</b>  |            | <b>3</b> | <b>4</b>  |
|-----------------------------------------|----------|-----------|------------|----------|-----------|
| Ni1 – O11                               | 1.847(4) | 1.863(9)  | M 1 – O31  | 2.431(5) | 2.722(8)  |
| Ni1 – O31                               | 1.840(4) | 1.842(10) | M 1 – O41  | 2.583(4) | 2.956(10) |
| Ni1 – N19                               | 1.859(5) | 1.877(12) | M 1 – O51  | 2.503(4) | 2.994(8)  |
| Ni1 – N23                               | 1.865(5) | 1.863(11) | M 1 – O61  | 2.415(5) | 2.816(9)  |
| Ni2 – O61                               | 1.846(3) | 1.837(9)  | M 1 – O81  | 2.412(4) | 2.702(9)  |
| Ni2 – O81                               | 1.839(4) | 1.842(10) | M 1 – O91  | 2.570(4) | 2.930(8)  |
| Ni2 – N69                               | 1.855(5) | 1.835(13) | M 1 – O101 | 2.529(4) | 3.022(8)  |
| Ni2 – N73                               | 1.857(5) | 1.867(13) | M1 – O1    |          | 2.846(12) |
| M1 – O11                                | 2.412(5) | 2.857(9)  | M1 – O2    |          | 2.855(13) |
| M = Na for <b>3</b> and Ba for <b>4</b> |          |           |            |          |           |

**Table S5.** Bond angles of complex **3**.

| Bond angles (Å) of <b>3</b> |            |                  |            |
|-----------------------------|------------|------------------|------------|
| O11 – Ni1 – O31             | 83.38(18)  | O31 – Na1 – O51  | 63.47(15)  |
| O11 – Ni1 – N19             | 93.6(2)    | O31 – Na1 – O61  | 141.92(15) |
| O11 – Ni1 – N23             | 169.34(18) | O31 – Na1 – O81  | 137.03(15) |
| O31 – Ni1 – N19             | 168.3(2)   | O31 – Na1 – O91  | 85.03(15)  |
| O31 – Ni1 – N23             | 93.4(2)    | O31 – Na1 – O101 | 87.51(16)  |
| N19 – Ni1 – N23             | 91.5(2)    | O41 – Na1 – O51  | 170.16(14) |
| O61 – Ni1 – O81             | 83.68(17)  | O41 – Na1 – O61  | 89.93(15)  |
| O61 – Ni1 – N69             | 93.01(19)  | O41 – Na1 – O81  | 85.67(14)  |
| O61 – Ni1 – N73             | 170.95(18) | O41 – Na1 – O91  | 106.57(14) |
| O81 – Ni1 – N69             | 170.68(18) | O41 – Na1 – O101 | 77.72(14)  |
| O81 – Ni1 – N73             | 93.79(19)  | O51 – Na1 – O61  | 91.12(15)  |
| N69 – Ni1 – N73             | 90.8(2)    | O51 – Na1 – O81  | 86.26(15)  |
| O11 – Na1 – O31             | 60.84(14)  | O51 – Na1 – O91  | 82.56(13)  |
| O11 – Na1 – O41             | 62.19(14)  | O51 – Na1 – O101 | 93.62(14)  |
| O11 – Na1 – O51             | 123.58(17) | O61 – Na1 – O81  | 61.23(13)  |
| O11 – Na1 – O61             | 129.26(14) | O61 – Na1 – O91  | 62.76(14)  |
| O11 – Na1 – O81             | 143.97(15) | O61 – Na1 – O101 | 123.96(16) |

|                  |            |                  |            |
|------------------|------------|------------------|------------|
| O11 – Na1 – O91  | 84.46(14)  | O81 – Na1 – O91  | 122.44(17) |
| O11 – Na1 – O101 | 92.39(16)  | O81 – Na1 – O101 | 63.44(15)  |
| O31 – Na1 – O41  | 120.07(16) | O91 – Na1 – O101 | 172.52(19) |

**Table S6.** Bond angles of complex **4**.

| Bond angles (Å) of <b>4</b> |          |                  |          |
|-----------------------------|----------|------------------|----------|
| O11 – Ni1 – O31             | 83.1(4)  | O11 – Ba1 – O31  | 52.2(2)  |
| O11 – Ni1 – N19             | 95.4(4)  | O11 – Ba1 – O41  | 53.3(3)  |
| O11 – Ni1 – N23             | 168.5(4) | O11 – Ba1 – O51  | 95.2(2)  |
| O31 – Ni1 – N19             | 168.6(4) | O11 – Ba1 – O61  | 79.0(3)  |
| O31 – Ni1 – N23             | 92.8(4)  | O11 – Ba1 – O81  | 78.7(3)  |
| N19 – Ni1 – N23             | 90.7(5)  | O11 – Ba1 – O91  | 109.3(3) |
| O61 – Ni1 – O81             | 82.2(4)  | O11 – Ba1 – O101 | 119.6(3) |
| O61 – Ni1 – N69             | 95.2(5)  | O31 – Ba1 – O41  | 102.4(3) |
| O61 – Ni1 – N73             | 167.4(5) | O31 – Ba1 – O51  | 53.9(3)  |
| O81 – Ni1 – N69             | 169.5(5) | O31 – Ba1 – O61  | 77.1(2)  |
| O81 – Ni1 – N73             | 93.0(5)  | O31 – Ba1 – O81  | 115.4(3) |
| N69 – Ni1 – N73             | 91.6(6)  | O31 – Ba1 – O91  | 66.5(2)  |
| O1 – Ba1 – O2               | 65.9(3)  | O31 – Ba1 – O101 | 169.0(3) |
| O1 – Ba1 – O11              | 165.7(3) | O41 – Ba1 – O51  | 117.9(3) |
| O1 – Ba1 – O31              | 119.0(3) | O41 – Ba1 – O61  | 107.3(3) |
| O1 – Ba1 – O41              | 127.9(3) | O41 – Ba1 – O81  | 66.1(3)  |
| O1 – Ba1 – O51              | 71.6(3)  | O41 – Ba1 – O91  | 159.4(3) |
| O1 – Ba1 – O61              | 111.4(3) | O41 – Ba1 – O101 | 73.0(3)  |
| O1 – Ba1 – O81              | 115.3(3) | O51 – Ba1 – O61  | 117.7(2) |
| O1 – Ba1 – O91              | 71.9(3)  | O51 – Ba1 – O81  | 168.6(3) |
| O1 – Ba1 – O101             | 70.6(3)  | O51 – Ba1 – O91  | 70.7(3)  |
| O2 – Ba1 – O11              | 106.0(3) | O51 – Ba1 – O101 | 137.1(3) |
| O2 – Ba1 – O31              | 114.8(3) | O61 – Ba1 – O81  | 52.0(3)  |
| O2 – Ba1 – O41              | 68.9(3)  | O61 – Ba1 – O91  | 54.4(3)  |
| O2 – Ba1 – O51              | 73.3(3)  | O61 – Ba1 – O101 | 94.5(3)  |

|                 |          |                  |          |
|-----------------|----------|------------------|----------|
| O2 – Ba1 – O61  | 167.9(3) | O81 – Ba1 – O91  | 102.0(3) |
| O2 – Ba1 – O81  | 117.5(3) | O81 – Ba1 – O101 | 53.6(3)  |
| O2 – Ba1 – O91  | 131.0(3) | O91 – Ba1 – O101 | 114.6(2) |
| O2 – Ba1 – O101 | 73.4(3)  |                  |          |

**Table S7.** Comparison of bond lengths of heterometallic nickel complexes of N<sub>2</sub>O<sub>4</sub> donor Schiff base ligands derived from propylenediamine and its derivative.

| Complex Code | Average bond length of Ni(II) with N <sub>2</sub> O <sub>2</sub> donor atoms of ligand [ $\tau$ 4] | Average bond length of guest metal with O <sub>4</sub> donor atoms of ligand | Ni(II) –guest metal ion distance | Reference |
|--------------|----------------------------------------------------------------------------------------------------|------------------------------------------------------------------------------|----------------------------------|-----------|
| XEDBEN       | 1.886(3)<br>[0.126]                                                                                | 2.371(4) [Ni-Na]                                                             | 3.467(2)                         | 1         |
| XEDBUD       | 1.859(5)<br>[0.225]                                                                                | 2.468(4) [Ni <sub>2</sub> Na]                                                | 3.501(2)                         | 1         |
| XEDCOY       | 1.868(4)<br>[0.160]                                                                                | 2.799(4) [Ni <sub>3</sub> K <sub>2</sub> ]                                   | 3.709(1)                         | 1         |
| XEDCEO       | 1.872(3)<br>[0.175]                                                                                | 3.141(1) [Ni <sub>2</sub> Cs]                                                | 4.004(1)                         | 1         |
| XEDBEN03     | 1.951(2)<br>[0.124]                                                                                | 2.386(3) [Ni-Na]                                                             | 3.467(2)                         | 2         |
| YUKTEG       | 1.884(5)<br>[0.089]                                                                                | 2.486(5) [Ni <sub>2</sub> Na]                                                | 3.571(2)                         | 3         |
| YUKTIK       | 1.884(5)<br>[0.162]                                                                                | 2.498(6) [Ni <sub>2</sub> Na]                                                | 3.649(2)                         | 3         |
| YUKTOQ       | 1.853(4)<br>[0.172]                                                                                | 2.504(4) [Ni <sub>2</sub> Na]                                                | 3.446(2)                         | 3         |
| YUKTUW       | 1.863(5)<br>[0.153]                                                                                | 2.499(5) [Ni <sub>2</sub> Na]                                                | 3.468(3)                         | 3         |
| EBIBUO       | 1.859(1)<br>[0.093]                                                                                | 2.459(2) [Ni <sub>2</sub> Na]                                                | 3.373(7)                         | 4         |
| EBIBOI       | 1.841(4)<br>[0.171]                                                                                | 2.931(4) [Ni <sub>2</sub> K]                                                 | 3.677(1)                         | 4         |
| EBIBIC       | 1.861(2)<br>[0.174]                                                                                | 2.562(2) [Ni <sub>3</sub> K <sub>2</sub> ]                                   | 3.693(1)                         | 4         |
| FOFLIX       | 1.885(2)<br>[0.117]                                                                                | 2.353(2) [Ni-Na]                                                             | 3.429(1)                         | 5         |
| Complex 2    | 1.875(2)<br>[0.108]                                                                                | 2.081(6) [Ni-Li]                                                             | 2.997(5)                         | This work |
| Complex 3    | 1.853(4)<br>[0.145]                                                                                | 2.482(4) [Ni <sub>2</sub> Na]                                                | 3.455(3)                         | This work |
| Complex 4    | 1.862(1)<br>[0.163]                                                                                | 2.875(8) [Ni <sub>2</sub> Ba]                                                | 3.751(2)                         | This work |

**Table S8.** Comparison of bond lengths of heterometallic nickel complexes of N<sub>2</sub>O<sub>4</sub> donor Schiff base ligands derived from ethylenediamine and its derivative.

| Complex Code | Average bond length of Ni(II) with N <sub>2</sub> O <sub>4</sub> donor atoms of ligand[t4] | Average bond length of guest metal with O <sub>4</sub> donor atoms of ligand | Ni(II) –guest metal ion distance | Reference |
|--------------|--------------------------------------------------------------------------------------------|------------------------------------------------------------------------------|----------------------------------|-----------|
| VEFHOH       | 1.843(3) [0.041]                                                                           | 2.164(7) [Ni-Li]                                                             | 3.012(7)                         | 6         |
| VEFMUS       | 1.845(1) [0.051]                                                                           | 3.692(1) [Ni <sub>2</sub> K]                                                 | 3.731(1)                         | 6         |
| QEWDEE       | 1.842(2) [0.030]                                                                           | 2.113(7) [Ni <sub>2</sub> Li <sub>2</sub> ]                                  | 2.976(6)                         | 7         |
| VEKRIP       | 1.846(2) [0.036]                                                                           | 3.118(2) [Ni <sub>2</sub> Cs]                                                | 4.014(1)                         | 7         |
| VILYEW01     | 1.843(3) [0.022]                                                                           | 2.456(3) [Ni-Na]                                                             | 3.390(2)                         | 7         |
| ECAYOY       | 1.842(1) [0.028]                                                                           | 2.428(1) [Ni-Na]                                                             | 3.324(1)                         | 8         |
| ECAYUE       | 1.835(2) [0.047]                                                                           | 2.485(2) [Ni <sub>2</sub> Li]                                                | 3.445(1)                         | 8         |
| ECAYEO       | 1.831(4) [0.034]                                                                           | 2.284(9) [Ni-Li]                                                             | 2.991(9)                         | 8         |
| ECAZAL       | 1.835(2) [0.039]                                                                           | 2.931(2) [Ni <sub>2</sub> Rb]                                                | 3.729(1)                         | 8         |
| ECAZEP       | 1.847(4) [0.043]                                                                           | 3.083(3) [Ni <sub>2</sub> Cs]                                                | 3.901(1)                         | 8         |
| ECAZIT       | 1.832(1) [0.032]                                                                           | 3.362(1) [Ni-Mg]                                                             | 3.206(1)                         | 8         |
| ECAZoz       | 1.832(3) [0.027]                                                                           | 2.439(3) [Ni-Ca]                                                             | 3.403(1)                         | 8         |
| JAWBAO       | 1.839(5) [0.029]                                                                           | 2.369(1) [Ni-Na]                                                             | 3.355(6)                         | 9         |
| ROMXOJ       | 1.846(2) [0.052]                                                                           | 2.89(1) [Ni <sub>2</sub> Ba]                                                 | 3.774(3)                         | 10        |
| ROMXUP       | 1.844(2) [0.030]                                                                           | 2.462(2) [Ni-Ca]                                                             | 3.393(1)                         | 10        |
| ROMYAW       | 1.828(4) [0.058]                                                                           | 2.261(4) [Ni-Mg]                                                             | 3.088(2)                         | 10        |
| ROMYEA       | 1.851(3) [0.017]                                                                           | 2.591(3) [Ni-Sr]                                                             | 3.591(1)                         | 10        |
| VILXUL       | 1.841(3) [0.021]                                                                           | 2.424(4) [Ni-Na]                                                             | 3.345(2)                         | 11        |
| VILYAS       | 1.832(6) [0.023]                                                                           | 2.485(2) [Ni <sub>2</sub> Na]                                                | 3.422(2)                         | 11        |
| VILYEW       | 1.835(2) [0.021]                                                                           | 2.456(2) [Ni-Na]                                                             | 3.387(1)                         | 11        |
| XEMJOQ       | 1.841(4) [0.019]                                                                           | 2.962(4) [Ni <sub>4</sub> K <sub>3</sub> ]                                   | 3.753(2)                         | 12        |
| XAJCET       | 1.842(2) [0.039]                                                                           | 2.445(3) [Ni-Na]                                                             | 3.390(1)                         | 13        |
| XAJCAP       | 1.841(3) [0.039]                                                                           | 2.458(3) [Ni <sub>2</sub> Na <sub>2</sub> ]                                  | 3.367(1)                         | 13        |
| Complex 1    | 1.844(6) [0.036]                                                                           | 2.207(1) [Ni-Li]                                                             | 3.008(2)                         | This work |

**Table S9.** UV-*vis* data of NiL<sup>en</sup> in presence of redox innocent metal ions.

| Ethylenediamine (five-membered ring) chelate |                       |       |     |                      |                        |                                     |                                                      |
|----------------------------------------------|-----------------------|-------|-----|----------------------|------------------------|-------------------------------------|------------------------------------------------------|
| Adducts                                      | CT band position (nm) |       |     | $\lambda_{iso}$ (nm) | d-d band position (nm) | NiL <sup>en</sup> : M <sup>n+</sup> | Stability constant (K <sub>b</sub> ) for 1:1 complex |
|                                              | ILCT                  | MLCT  |     |                      |                        |                                     |                                                      |
| NiL <sup>en</sup>                            | 253                   | 346   | 411 |                      | 552                    |                                     |                                                      |
| NiL <sup>en</sup> + Li <sup>+</sup>          | 246.5                 | 341   | 400 | 249, 349, 407.5      | 537                    | 1:1                                 | 7.87 x 10 <sup>3</sup>                               |
| NiL <sup>en</sup> + Na <sup>+</sup>          | 248                   | 342   | 402 | 250, 349.5, 405      | 542                    | 2:1                                 |                                                      |
| NiL <sup>en</sup> + K <sup>+</sup>           | 250                   | 343   | 404 | 251.5, 348.5, 407    | 549                    | 1:1                                 | 5.59 x 10 <sup>3</sup>                               |
| NiL <sup>en</sup> + Mg <sup>2+</sup>         | 237                   | 332.5 | 381 | 241, 342, 391        | 526                    | 2:1                                 |                                                      |
| NiL <sup>en</sup> + Ca <sup>2+</sup>         | 241                   | 334   | 384 | 244.5, 343, 395      | 535                    | 2:1                                 |                                                      |

|                                      |     |     |     |                 |     |     |  |
|--------------------------------------|-----|-----|-----|-----------------|-----|-----|--|
| NiL <sup>en</sup> + Ba <sup>2+</sup> | 245 | 338 | 392 | 247, 342.5, 397 | 547 | 2:1 |  |
|--------------------------------------|-----|-----|-----|-----------------|-----|-----|--|

**Table S10.** UV-vis data of NiL<sup>pn</sup> in presence of redox innocent metal ions.

| Propylenediamine (six-membered ring) chelate |                       |       |       |                      |                        |                                     |                                                      |
|----------------------------------------------|-----------------------|-------|-------|----------------------|------------------------|-------------------------------------|------------------------------------------------------|
| Adducts                                      | CT band position (nm) |       |       | $\lambda_{iso}$ (nm) | d-d band position (nm) | NiL <sup>en</sup> : M <sup>n+</sup> | Stability constant (K <sub>b</sub> ) for 1:1 complex |
|                                              | ILCT                  | MLCT  |       |                      |                        |                                     |                                                      |
| NiL <sup>pn</sup>                            | 257                   | 353.5 | 418   |                      | 591                    |                                     |                                                      |
| NiL <sup>pn</sup> + Li <sup>+</sup>          | 250                   | 346   | 406   | 252, 355.5, 409.5    | 580                    | 1:1                                 | 6.89 x 10 <sup>3</sup>                               |
| NiL <sup>pn</sup> + Na <sup>+</sup>          | 251                   | 347.5 | 408   | 254, 356.5, 414      | 582                    | 2:1                                 |                                                      |
| NiL <sup>pn</sup> + K <sup>+</sup>           | 253                   | 348.5 | 411.5 | 255, 357, 415        | 585                    | 2:1                                 |                                                      |
| NiL <sup>pn</sup> + Mg <sup>2+</sup>         | 231                   | 349   |       | 239.5, 382.5         | 564                    | 1:1                                 | 1.41 x 10 <sup>4</sup>                               |
| NiL <sup>pn</sup> + Ca <sup>2+</sup>         | 233                   | 352   |       | 242, 378,            | 556                    | 2:1                                 |                                                      |
| NiL <sup>pn</sup> + Ba <sup>2+</sup>         | 235                   | 350   |       | 243.5, 395           | 579                    | 2:1                                 |                                                      |

**Table S11.** Comparison of bond lengths of mononuclear nickel complexes of N<sub>2</sub>O<sub>4</sub> donor Schiff base ligands.

| Code of Ni(II) complex of Salen type N <sub>2</sub> O <sub>4</sub> ligand | Average bond length of Ni(II) with N <sub>2</sub> O <sub>2</sub> donor atoms of ligand[ $\tau_4$ ] | Reference | Code of Ni(II) complex of Salpn type N <sub>2</sub> O <sub>4</sub> ligand | Average bond length of Ni(II) with N <sub>2</sub> O <sub>2</sub> donor atoms of ligand[ $\tau_4$ ] | Reference |
|---------------------------------------------------------------------------|----------------------------------------------------------------------------------------------------|-----------|---------------------------------------------------------------------------|----------------------------------------------------------------------------------------------------|-----------|
| ARARIV                                                                    | 1.857(7)<br>[0.064]                                                                                | 14        | CEHZAT                                                                    | 1.863(3)<br>[0.143]                                                                                | 29        |
| AXUTOE                                                                    | 1.856(5)<br>[0.096]                                                                                | 15        | HAIYOK                                                                    | 1.884(4)<br>[0.115]                                                                                | 30        |
| AXUTUK                                                                    | 1.862(2)<br>[0.047]                                                                                | 15        | IQEGER                                                                    | 1.859(3)<br>[0.137]                                                                                | 31        |
| BOCVEX                                                                    | 1.853(3)<br>[0.019]                                                                                | 16        | LOSBEB                                                                    | 1.866(1)<br>[0.272]                                                                                | 32        |
| GECFEB                                                                    | 1.865(1)<br>[0.101]                                                                                | 17        | PONZOK                                                                    | 1.868(3)<br>[0.264]                                                                                | 33        |
| GECFIF                                                                    | 1.863(6)<br>[0.109]                                                                                | 17        |                                                                           |                                                                                                    |           |
| GECFOL                                                                    | 1.853(1)<br>[0.102]                                                                                | 17        |                                                                           |                                                                                                    |           |
| IDELUZ                                                                    | 1.854(3)<br>[0.072]                                                                                | 18        |                                                                           |                                                                                                    |           |
| IDUPEG                                                                    | 1.865(2)<br>[0.021]                                                                                | 19        |                                                                           |                                                                                                    |           |
| KOHHAQ                                                                    | 1.845(2)<br>[0.049]                                                                                | 20        |                                                                           |                                                                                                    |           |



|          |                     |    |  |  |  |
|----------|---------------------|----|--|--|--|
| KOHHIY   | 1.851(5)<br>[0.036] | 20 |  |  |  |
| MABNEK   | 1.848(2)<br>[0.079] | 21 |  |  |  |
| QIYVAX   | 1.837(2)<br>[0.063] | 22 |  |  |  |
| SULZUU   | 1.841(6)<br>[0.042] | 23 |  |  |  |
| TEJGIZ   | 1.843(2)<br>[0.017] | 24 |  |  |  |
| TUMMUL   | 1.844(2)<br>[0.039] | 25 |  |  |  |
| TUZDOK   | 1.858(2)<br>[0.032] | 26 |  |  |  |
| ECA YEO  | 1.838(5)<br>[0.024] | 8  |  |  |  |
| ECAZIT   | 1.844(4)<br>[0.054] | 8  |  |  |  |
| VOHSIV   | 1.855(1)<br>[0.027] | 27 |  |  |  |
| VOHSIV01 | 1.857(1)<br>[0.027] | 28 |  |  |  |
| TUZDUQ   | 1.855(1)<br>[0.039] | 26 |  |  |  |
| TUZFAY   | 1.853(2)<br>[0.028] | 26 |  |  |  |

## References

1. D. Cunningham, P. McArdle, M. Mitchell, N. N. Chonchubhair, M. O'Gara, F. Franceschi and C. Floriani, *Inorg. Chem.*, 2000, **39**, 1639.
2. Z. Hong, *Synth. React. Inorg., Met. -Org., Nano-Met. Chem.*, 2008, **38**, 448.
3. P. K. Bhaumik, A. Banerjee, T. Dutta, S. Chatterjee, A. Frontera and S. Chattopadhyay, *CrystEngComm*, 2020, **22**, 2970.
4. M. Mousavi, V. Berau, J.-P. Costes, C. Duhayon and J.-P. Sutter, *CrystEngComm*, 2011, **13**, 5908.
5. K. Das, A. Datta, S. Roy, J. K. Clegg, E. Garribba, C. Sinha and H. Kara, *Polyhedron*, 2014, **78**, 62.
6. A. I. Volkov, R. V. Apraksin, E. A. Falaleev, J. V. Novoselova, Y. A. Volosatova, D. A. Lukyanov, E. V. Alekseeva and O. V. Levin, *Electrochimica Acta*, 2022, **425**, 140750.
7. A. Finelli, N. Herault, A. Crochet and K. M. Fromm, *Cryst. Growth Des.*, 2018, **18**, 1215.
8. S. Sarkar and S. Mohanta, *RSC Advances*, 2011, **1**, 640.
9. R. R. Choudhury, C. Roy Choudhury, J. A. Real, A. Frontera and S. Mitra, *J. Indian Chem. Soc.*, 2017, **94**, 511.

10. A. Finelli, N. Herault, A. Crochet and K. M. Fromm, *ACS Omega*, 2019, **4**, 10231.
11. P. Bhowmik, S. Chatterjee and S. Chattopadhyay, *Polyhedron*, 2013, **63**, 214.
12. D. Zhang and Z. Zhao, *Coord. Chem.*, 2011, **37**, 934.
13. N. Mahlooji, M. Behzad, A. Tarahhomi, M. Maroney, H. A. Rudbari, G. Bruno, B. Ghanbari, *J. Mol. Struct.*, 2016, **1110**, 119.
14. R. M. Haak, A. M. Castilla, M. M. Belmonte, E. C. Escudero-Adan, J. Benet-Buchholz and A. W. Kleij, *Dalton Trans.*, 2011, **40**, 3352.
15. S. Hazra, R. Meyrelles, A. J. Charmier, P. Rijo, M. Fatima, C. Guedes da Silva and A. J. L. Pombeiro, *Dalton Trans.*, 2016, **45**, 17929.
16. N. M. S. S. V. K. C. K. M. R. P. Kurup, *Appl. Organomet. Chem.*, 2019, **33**, e4900.
17. S. Sarkar, M. Fleck, S. Mohanta, *J. Mol. Struct.*, 2012, **1021**, 174.
18. L. Salmon, P. Thuery and M. Ephritikhine, *CSD Communication*, 2006.
19. H. Mao, M. Guo, H. Fu, K. Yin, M. Jin, C. Wang, Y. Zhao and Z. Dong, J. Liu, *Eur. J. Inorg. Chem.*, 2023, 26.
20. G. Hoshina, M. Tsuchimoto and S. Ohba, *Bull. Chem. Soc. Jpn.*, 2000, **73**, 369.
21. A. Jana, S. Majumder, L. Carrella, M. Nayak, T. Weyhermueller, S. Dutta, D. Schollmeyer, E. Rentschler, R. Koner and S. Mohanta, *Inorg. Chem.*, 2010, **49**, 9012.
22. A. Ghaffari, M. Behzad, M. Pooyan, H. A. Rudbari and G. Bruno, *J. Mol. Struct.*, 2014, **1063**, 1.
23. U. Casellato, P. Guerriero, S. Tamburini, P. A. Vigato and C. Benelli, *Inorg. Chim. Acta*, 1993, **207**, 39.
24. Yu-Ye Yu, *Acta Crystallogr., Sect. E: Struct. Rep. Online*, 2006, **62**, m948.
25. S. Ghosh, L. Mandal and S. Mohanta, *Polyhedron*, 2015, **97**, 1.
26. A. Vrablova, M. Tomas, J. Titis, J. Cernak and L. R. Falvello, *Inorg. Chim. Acta*, 2020, **512**, 119874.
27. H. Xie, *Acta Crystallogr., Sect. E: Struct. Rep. Online*, 2008, **64**, m1638.
28. S. Sarkar, M. Nayak, M. Fleck, S. Dutta, U. Florke, R. Koner and S. Mohanta, *Eur. J. Inorg. Chem.*, 2010, 735.
29. S. Rayati, E. Khodaei, M. Jafarian, A. Bahrami, A. Wojtczak and A. Kozakiewicz, *J. Coord. Chem.*, 2017, **70**, 1424.
30. S. Roy, D. Sutradhar, M. G. B. Drew and S. Chattopadhyay, *CrystEngComm*, 2020, **23**, 6724.
31. A. Cucos, A. Ursu, A. M. Madalan, C. Duhayon, J.-P. Sutter and M. Andruh, *CrystEngComm*, 2011, **13**, 3756.
32. C. S. Yeap, R. Kia, H. Kargar and H.-K. Fun, *Acta Crystallogr., Sect. E: Struct. Rep. Online*, 2009, **65**, m570.
33. N. Mohan, S. S. Sreejith, P. M. Sabura Begum and M. R. Prathapachandra Kurup, *Appl. Organomet. Chem.*, 2019, **33**, e5064.

## Cartesian Coordinates

### Ni(I)L<sup>en</sup>

|    |            |           |           |
|----|------------|-----------|-----------|
| Ni | -1.8234017 | 6.4005139 | 7.0530212 |
| O  | 0.0930587  | 6.8533905 | 7.2111350 |

|   |            |            |            |
|---|------------|------------|------------|
| O | -1.3393465 | 4.7479576  | 6.1441534  |
| O | -0.1278597 | 2.6111482  | 5.2102841  |
| O | 2.7008230  | 6.8412324  | 7.5265617  |
| N | -3.6837721 | 5.9228221  | 7.1387210  |
| N | -2.3470189 | 8.0823087  | 7.7326589  |
| C | -2.0612879 | 3.6840385  | 6.0538300  |
| C | 0.5830564  | 7.8415401  | 7.8701881  |
| C | -1.4556487 | 2.4685222  | 5.5496702  |
| C | -4.4765529 | 6.9066639  | 7.9219428  |
| C | -4.1375681 | 4.6863148  | 7.0506642  |
| H | -5.1071362 | 4.4358215  | 7.5126302  |
| C | 2.0200439  | 7.9015794  | 8.0785703  |
| C | -3.4515126 | 3.5857901  | 6.4488591  |
| C | -1.6065566 | 8.9827707  | 8.3280809  |
| H | -2.1088882 | 9.8463126  | 8.8016094  |
| C | -0.1799141 | 8.9342473  | 8.4398683  |
| C | -4.3881356 | 6.5730350  | 9.4218627  |
| H | -3.3318137 | 6.5556269  | 9.7244526  |
| H | -4.8201108 | 5.5820206  | 9.6220631  |
| H | -4.9261350 | 7.3203471  | 10.0272734 |
| C | 0.4755774  | 9.9824300  | 9.1404619  |
| H | -0.1376444 | 10.7892456 | 9.5543123  |
| C | -3.5318695 | 1.2242531  | 5.8022958  |
| H | -4.0834499 | 0.2886143  | 5.6936369  |
| C | -4.1433175 | 2.3497174  | 6.3159992  |
| H | -5.1909661 | 2.3083203  | 6.6304150  |
| C | -3.7864608 | 8.2630592  | 7.6594615  |
| H | -4.1532849 | 9.0269612  | 8.3727518  |
| H | -4.0460470 | 8.5911425  | 6.6372508  |
| C | 2.6232926  | 8.9462537  | 8.7633597  |
| H | 3.7056786  | 8.9673649  | 8.8942183  |
| C | -2.1732117 | 1.2874032  | 5.4086817  |
| H | -1.6970524 | 0.3959501  | 4.9993010  |
| C | 1.8455977  | 10.0004605 | 9.3028188  |
| H | 2.3359727  | 10.8152559 | 9.8378282  |
| C | 4.1050556  | 6.8207385  | 7.6813668  |
| H | 4.5889399  | 7.6972120  | 7.2086483  |
| H | 4.4513099  | 5.9064139  | 7.1824979  |
| H | 4.4063735  | 6.7887178  | 8.7460643  |
| C | -5.9384248 | 6.9864570  | 7.4603547  |
| H | -6.4419628 | 7.8435686  | 7.9343359  |
| H | -6.4999186 | 6.0809101  | 7.7288639  |
| H | -5.9846364 | 7.1091396  | 6.3686857  |
| C | 0.5445149  | 1.4657641  | 4.7303574  |
| H | 0.5436325  | 0.6413250  | 5.4695886  |
| H | 1.5797116  | 1.7792264  | 4.5429116  |
| H | 0.1046712  | 1.0872024  | 3.7873874  |

**Ni (I) L<sup>en</sup> + Li<sup>+</sup>**

|    |            |            |            |
|----|------------|------------|------------|
| Ni | -1.9374781 | 6.5470018  | 6.9488428  |
| O  | -0.0814782 | 7.1470128  | 6.7067899  |
| O  | -1.2185715 | 4.8449596  | 6.3349375  |
| O  | 0.0868185  | 2.7966693  | 5.4469189  |
| O  | 2.3703157  | 6.6268965  | 7.3062738  |
| N  | -3.6694065 | 5.9471507  | 7.2797804  |
| N  | -2.4631048 | 8.2640404  | 7.5265740  |
| C  | -1.9326409 | 3.7562047  | 6.1785486  |
| C  | 0.4622201  | 7.9710951  | 7.5759010  |
| C  | -1.2624244 | 2.5943130  | 5.6814271  |
| C  | -4.4980643 | 6.9544683  | 8.0077609  |
| C  | -4.1046192 | 4.7387286  | 7.0468702  |
| H  | -5.1418686 | 4.4796229  | 7.3046103  |
| C  | 1.8325369  | 7.7713719  | 7.9021367  |
| C  | -3.3275956 | 3.6549360  | 6.4843373  |
| C  | -1.6941048 | 9.0984555  | 8.1911850  |
| H  | -2.1668276 | 9.8677538  | 8.8235127  |
| C  | -0.2565542 | 9.0130120  | 8.2463400  |
| C  | -4.2836002 | 6.7161415  | 9.5123839  |
| H  | -3.2137942 | 6.7899201  | 9.7512781  |
| H  | -4.6328736 | 5.7128907  | 9.7934477  |
| H  | -4.8358753 | 7.4602861  | 10.1046414 |
| C  | 0.4702310  | 9.8904333  | 9.0929883  |
| H  | -0.0689292 | 10.6998477 | 9.5907631  |
| C  | -3.3147709 | 1.3153418  | 5.7662893  |
| H  | -3.8404302 | 0.3748091  | 5.6020949  |
| C  | -3.9853961 | 2.4163165  | 6.2635288  |
| H  | -5.0496653 | 2.3438847  | 6.4994885  |

|    |            |            |           |
|----|------------|------------|-----------|
| C  | -3.9140426 | 8.3424562  | 7.6161042 |
| H  | -4.2542321 | 9.1010182  | 8.3447482 |
| H  | -4.3039395 | 8.6195186  | 6.6223351 |
| C  | 2.5226268  | 8.6455362  | 8.7308380 |
| H  | 3.5826034  | 8.5105167  | 8.9420269 |
| C  | -1.9375140 | 1.4002729  | 5.4735609 |
| H  | -1.4177296 | 0.5233775  | 5.0896409 |
| C  | 1.8264966  | 9.7276614  | 9.3148119 |
| H  | 2.3654054  | 10.4207356 | 9.9606415 |
| C  | 3.7418186  | 6.3429305  | 7.5852415 |
| H  | 4.3980223  | 7.1506956  | 7.2216769 |
| H  | 3.9797426  | 5.4159089  | 7.0497180 |
| H  | 3.9100498  | 6.1955389  | 8.6651841 |
| C  | -5.9874325 | 6.9083483  | 7.6490808 |
| H  | -6.5012883 | 7.7748112  | 8.0893339 |
| H  | -6.4779299 | 6.0072167  | 8.0413452 |
| H  | -6.1284973 | 6.9384360  | 6.5593522 |
| C  | 0.8232018  | 1.6974000  | 4.9150048 |
| H  | 0.8186736  | 0.8346866  | 5.6029086 |
| H  | 1.8524834  | 2.0532656  | 4.7882671 |
| H  | 0.4249411  | 1.3818921  | 3.9359878 |
| Li | 0.5428917  | 5.4513123  | 6.3448407 |

**Ni (I) L<sup>en</sup> + Na<sup>+</sup>**

|    |            |            |            |
|----|------------|------------|------------|
| Ni | -1.8646853 | 6.3601650  | 7.2082827  |
| O  | 0.0452856  | 6.8741470  | 7.1355073  |
| O  | -1.2407624 | 4.6008939  | 6.6058940  |
| O  | -0.0250566 | 2.5736005  | 5.5125644  |
| O  | 2.6229068  | 6.7484140  | 7.5469952  |
| N  | -3.6576031 | 5.8249576  | 7.4145784  |
| N  | -2.3910366 | 8.1104983  | 7.6622516  |
| C  | -2.0165820 | 3.6116485  | 6.2550779  |
| C  | 0.5596467  | 7.8869044  | 7.7844783  |
| C  | -1.4075816 | 2.4636814  | 5.6500650  |
| C  | -4.4836175 | 6.8704652  | 8.0818328  |
| C  | -4.1745152 | 4.6949840  | 7.0124299  |
| H  | -5.2592007 | 4.5345632  | 7.0946202  |
| C  | 1.9707730  | 7.8908685  | 8.0208112  |
| C  | -3.4391850 | 3.5925640  | 6.4351172  |
| C  | -1.6426812 | 9.0246698  | 8.2314902  |
| H  | -2.1359452 | 9.8668690  | 8.7455946  |
| C  | -0.2034267 | 8.9914039  | 8.2957732  |
| C  | -4.3330260 | 6.6591676  | 9.5988658  |
| H  | -3.2718970 | 6.7135265  | 9.8774890  |
| H  | -4.7145902 | 5.6686629  | 9.8827763  |
| H  | -4.8920178 | 7.4258293  | 10.1551845 |
| C  | 0.4754942  | 10.0517494 | 8.9489312  |
| H  | -0.1137931 | 10.8907079 | 9.3271444  |
| C  | -3.5494288 | 1.3564478  | 5.4469511  |
| H  | -4.1298090 | 0.4874648  | 5.1378480  |
| C  | -4.1702849 | 2.4499184  | 6.0206666  |
| H  | -5.2534009 | 2.4471510  | 6.1643305  |
| C  | -3.8426519 | 8.2285962  | 7.6823901  |
| H  | -4.1924436 | 9.0182485  | 8.3740425  |
| H  | -4.1796130 | 8.4880925  | 6.6648702  |
| C  | 2.6090747  | 8.9503568  | 8.6508388  |
| H  | 3.6889460  | 8.9542219  | 8.7924092  |
| C  | -2.1510296 | 1.3607317  | 5.2580130  |
| H  | -1.6725721 | 0.4928191  | 4.8059977  |
| C  | 1.8482311  | 10.0442804 | 9.1151388  |
| H  | 2.3511967  | 10.8760590 | 9.6081798  |
| C  | 4.0298404  | 6.6776329  | 7.7689835  |
| H  | 4.5629623  | 7.4915742  | 7.2495248  |
| H  | 4.3599442  | 5.7148211  | 7.3583592  |
| H  | 4.2724704  | 6.7143906  | 8.8443786  |
| C  | -5.9625571 | 6.8735718  | 7.6797160  |
| H  | -6.4532719 | 7.7677520  | 8.0899214  |
| H  | -6.4982905 | 5.9998530  | 8.0753665  |
| H  | -6.0757439 | 6.8893659  | 6.5861003  |
| C  | 0.6472117  | 1.4753528  | 4.9007748  |
| H  | 0.5265282  | 0.5487504  | 5.4873404  |
| H  | 1.7106681  | 1.7433663  | 4.8679681  |
| H  | 0.2865676  | 1.3021732  | 3.8726290  |
| Na | 0.9389527  | 4.9531661  | 6.5258052  |

**Ni (I) L<sup>en</sup> + K<sup>+</sup>**

|    |            |           |           |
|----|------------|-----------|-----------|
| Ni | -1.8001869 | 6.2969748 | 7.2390442 |
|----|------------|-----------|-----------|

|   |            |            |            |
|---|------------|------------|------------|
| O | 0.1422071  | 6.8220629  | 7.3058586  |
| O | -1.2414770 | 4.5109100  | 6.5597906  |
| O | -0.1169975 | 2.4107934  | 5.4219103  |
| O | 2.7576635  | 6.8802918  | 7.6779795  |
| N | -3.6272436 | 5.7894725  | 7.4128359  |
| N | -2.3399333 | 8.0604304  | 7.6832117  |
| C | -2.0508323 | 3.5476666  | 6.2135389  |
| C | 0.6150481  | 7.8908649  | 7.8891516  |
| C | -1.5009480 | 2.3728639  | 5.5912083  |
| C | -4.4428468 | 6.8443366  | 8.0756906  |
| C | -4.1729680 | 4.6759562  | 7.0091529  |
| H | -5.2598650 | 4.5369386  | 7.1051244  |
| C | 2.0309009  | 7.9898641  | 8.1150651  |
| C | -3.4742141 | 3.5628962  | 6.4136264  |
| C | -1.6211920 | 9.0038469  | 8.2323322  |
| H | -2.1383250 | 9.8693677  | 8.6818732  |
| C | -0.1855608 | 8.9990997  | 8.3380352  |
| C | -4.2907228 | 6.6484665  | 9.5944557  |
| H | -3.2280304 | 6.6885560  | 9.8690717  |
| H | -4.6875044 | 5.6673837  | 9.8903667  |
| H | -4.8355588 | 7.4302298  | 10.1440946 |
| C | 0.4377664  | 10.1170603 | 8.9480555  |
| H | -0.1947176 | 10.9441040 | 9.2801452  |
| C | -3.6853371 | 1.3377409  | 5.4175241  |
| H | -4.3001263 | 0.4909928  | 5.1132694  |
| C | -4.2534904 | 2.4496391  | 6.0075448  |
| H | -5.3331898 | 2.4871004  | 6.1722659  |
| C | -3.7901534 | 8.1865388  | 7.6554775  |
| H | -4.1541923 | 8.9993258  | 8.3122565  |
| H | -4.0967708 | 8.4147393  | 6.6210258  |
| C | 2.6130685  | 9.1054331  | 8.7010673  |
| H | 3.6918279  | 9.1663966  | 8.8387664  |
| C | -2.2915635 | 1.2996490  | 5.2073763  |
| H | -1.8505932 | 0.4184252  | 4.7433617  |
| C | 1.8065387  | 10.1818530 | 9.1239614  |
| H | 2.2693642  | 11.0537517 | 9.5858697  |
| C | 4.1654309  | 6.9115188  | 7.8948472  |
| H | 4.6444577  | 7.7413406  | 7.3477205  |
| H | 4.5597769  | 5.9594472  | 7.5157688  |
| H | 4.4094326  | 6.9991874  | 8.9671983  |
| C | -5.9238327 | 6.8632635  | 7.6804347  |
| H | -6.3995032 | 7.7673686  | 8.0867814  |
| H | -6.4702414 | 6.0005987  | 8.0854601  |
| H | -6.0435218 | 6.8726008  | 6.5873773  |
| C | 0.4839492  | 1.2750344  | 4.8055887  |
| H | 0.3242388  | 0.3578066  | 5.3978470  |
| H | 1.5607077  | 1.4832193  | 4.7540510  |
| H | 0.1003233  | 1.1156065  | 3.7832763  |
| K | 1.2973377  | 4.7380847  | 6.4145628  |

**Ni (I) L<sup>en</sup> + Mg<sup>2+</sup>**

|    |            |            |            |
|----|------------|------------|------------|
| Ni | -1.9942064 | 6.3598275  | 7.3283207  |
| O  | -0.2051958 | 6.8572490  | 6.6841738  |
| O  | -1.2383221 | 4.5537295  | 7.4399795  |
| O  | 0.2232054  | 3.1846778  | 5.8395106  |
| O  | 2.1591810  | 6.2017303  | 7.4341158  |
| N  | -3.7299750 | 5.7770236  | 7.6784202  |
| N  | -2.5224514 | 8.1311490  | 7.5088904  |
| C  | -1.9154657 | 3.6477429  | 6.7265380  |
| C  | 0.4030407  | 7.7809117  | 7.4380239  |
| C  | -1.1598709 | 2.8080278  | 5.8879478  |
| C  | -4.5673185 | 6.8907098  | 8.2105740  |
| C  | -4.1832208 | 4.6203758  | 7.2763487  |
| H  | -5.2635524 | 4.4271023  | 7.2527215  |
| C  | 1.7319314  | 7.5170583  | 7.8166295  |
| C  | -3.3351974 | 3.5674275  | 6.7221866  |
| C  | -1.7112529 | 9.0761559  | 7.9109463  |
| H  | -2.1268901 | 9.9946872  | 8.3512849  |
| C  | -0.2608247 | 8.9375500  | 7.9375647  |
| C  | -4.3528410 | 6.8971414  | 9.7351075  |
| H  | -3.2862904 | 7.0221316  | 9.9682441  |
| H  | -4.6913956 | 5.9479030  | 10.1708671 |
| H  | -4.9186658 | 7.7172485  | 10.1978423 |
| C  | 0.5344503  | 9.8762230  | 8.6366743  |
| H  | 0.0655419  | 10.7894611 | 9.0072545  |
| C  | -3.1326009 | 1.6061978  | 5.2694271  |
| H  | -3.6045148 | 0.7876765  | 4.7280298  |

|    |            |            |           |
|----|------------|------------|-----------|
| C  | -3.9105262 | 2.4936469  | 6.0039746 |
| H  | -4.9963991 | 2.3831135  | 6.0026795 |
| C  | -3.9789018 | 8.2125115  | 7.6012534 |
| H  | -4.3181091 | 9.0746179  | 8.2006598 |
| H  | -4.3670398 | 8.3262416  | 6.5767328 |
| C  | 2.4958275  | 8.4351424  | 8.5192797 |
| H  | 3.5345810  | 8.2484056  | 8.7855838 |
| C  | -1.7368241 | 1.7722587  | 5.1707278 |
| H  | -1.1536166 | 1.1010942  | 4.5429397 |
| C  | 1.8795892  | 9.6451205  | 8.8967735 |
| H  | 2.4660554  | 10.3890225 | 9.4339593 |
| C  | 3.5265683  | 5.8427893  | 7.7558445 |
| H  | 4.2208326  | 6.5256275  | 7.2490981 |
| H  | 3.6733455  | 4.8223087  | 7.3839443 |
| H  | 3.6822091  | 5.8688900  | 8.8427336 |
| C  | -6.0532584 | 6.7886971  | 7.8639388 |
| H  | -6.5748449 | 7.6972641  | 8.1942931 |
| H  | -6.5281961 | 5.9404406  | 8.3752864 |
| H  | -6.2082361 | 6.6823542  | 6.7807275 |
| C  | 1.0864856  | 2.3787166  | 4.9983842 |
| H  | 1.0974549  | 1.3416889  | 5.3583266 |
| H  | 2.0904037  | 2.8102973  | 5.0830821 |
| H  | 0.7491759  | 2.4227033  | 3.9541999 |
| Mg | 0.5145256  | 5.0570287  | 6.7802530 |

**Ni (I) L<sup>en</sup> + Ca<sup>2+</sup>**

|    |            |            |            |
|----|------------|------------|------------|
| Ni | -1.9180794 | 6.3517529  | 7.3058131  |
| O  | -0.0071321 | 6.8507372  | 7.0805499  |
| O  | -1.2479121 | 4.5508375  | 6.8982045  |
| O  | 0.0456052  | 2.7236290  | 5.6625838  |
| O  | 2.5060542  | 6.5992269  | 7.5206514  |
| N  | -3.7030549 | 5.7973966  | 7.5066497  |
| N  | -2.4266991 | 8.1095784  | 7.6973608  |
| C  | -2.0178437 | 3.5856525  | 6.4022377  |
| C  | 0.5369643  | 7.8782886  | 7.7312864  |
| C  | -1.3552442 | 2.5333495  | 5.7330826  |
| C  | -4.5327709 | 6.8687893  | 8.1363321  |
| C  | -4.2065940 | 4.6808617  | 7.0610762  |
| H  | -5.2942743 | 4.5298949  | 7.0664352  |
| C  | 1.9268971  | 7.8122104  | 7.9705070  |
| C  | -3.4361604 | 3.5831891  | 6.4946892  |
| C  | -1.6581862 | 9.0502554  | 8.1763380  |
| H  | -2.1203170 | 9.9400559  | 8.6311141  |
| C  | -0.2077615 | 8.9891086  | 8.2190982  |
| C  | -4.3913850 | 6.6904130  | 9.6589027  |
| H  | -3.3345340 | 6.7528711  | 9.9523192  |
| H  | -4.7770952 | 5.7088586  | 9.9648712  |
| H  | -4.9566131 | 7.4691314  | 10.1893999 |
| C  | 0.5127949  | 10.0313900 | 8.8511043  |
| H  | -0.0382029 | 10.8976040 | 9.2216810  |
| C  | -3.4484763 | 1.4255322  | 5.3383865  |
| H  | -4.0023207 | 0.5788617  | 4.9351699  |
| C  | -4.1224865 | 2.4692719  | 5.9537292  |
| H  | -5.2116192 | 2.4429536  | 6.0204403  |
| C  | -3.8845520 | 8.2216382  | 7.7096699  |
| H  | -4.2384343 | 9.0264526  | 8.3769273  |
| H  | -4.2062065 | 8.4566253  | 6.6826563  |
| C  | 2.6154656  | 8.8439380  | 8.5906478  |
| H  | 3.6908733  | 8.8034794  | 8.7537436  |
| C  | -2.0461557 | 1.4504014  | 5.2108059  |
| H  | -1.5368243 | 0.6302068  | 4.7079229  |
| C  | 1.8876068  | 9.9707477  | 9.0192765  |
| H  | 2.4164953  | 10.7911904 | 9.5022860  |
| C  | 3.9330918  | 6.4708548  | 7.6962270  |
| H  | 4.4641056  | 7.2595896  | 7.1445227  |
| H  | 4.2104538  | 5.4915869  | 7.2857056  |
| H  | 4.2000781  | 6.5079968  | 8.7620335  |
| C  | -6.0052122 | 6.8611549  | 7.7198489  |
| H  | -6.5046396 | 7.7568794  | 8.1135859  |
| H  | -6.5386212 | 5.9917315  | 8.1269450  |
| H  | -6.1139102 | 6.8631560  | 6.6258630  |
| C  | 0.7951424  | 1.6898409  | 4.9898115  |
| H  | 0.6737753  | 0.7252367  | 5.5032472  |
| H  | 1.8491413  | 1.9915347  | 5.0319020  |
| H  | 0.4821696  | 1.6022928  | 3.9393276  |
| Ca | 0.8510042  | 4.9288632  | 6.6393294  |

**Ni (I) L<sup>en</sup> + Ba<sup>2+</sup>**

|    |            |            |            |
|----|------------|------------|------------|
| Ni | -1.8254324 | 6.2762829  | 7.3569586  |
| O  | 0.1484223  | 6.7591361  | 7.4397811  |
| O  | -1.2418970 | 4.4674037  | 6.6913332  |
| O  | -0.0921266 | 2.4146024  | 5.5755596  |
| O  | 2.7432519  | 6.8518853  | 7.6469398  |
| N  | -3.6649993 | 5.7780221  | 7.4316548  |
| N  | -2.3424866 | 8.0298768  | 7.8467339  |
| C  | -2.0709629 | 3.5186559  | 6.2546566  |
| C  | 0.6383324  | 7.8841779  | 7.9620001  |
| C  | -1.4961022 | 2.3761239  | 5.6392894  |
| C  | -4.4871546 | 6.8271458  | 8.1051773  |
| C  | -4.2059881 | 4.6906999  | 6.9704581  |
| H  | -5.2960636 | 4.5610648  | 7.0142162  |
| C  | 2.0470856  | 7.9885124  | 8.0968995  |
| C  | -3.4889976 | 3.5808572  | 6.3699446  |
| C  | -1.6093270 | 8.9959232  | 8.3149327  |
| H  | -2.1004739 | 9.9074699  | 8.6914725  |
| C  | -0.1621920 | 8.9821205  | 8.3920307  |
| C  | -4.3984366 | 6.5614954  | 9.6182260  |
| H  | -3.3492499 | 6.5652399  | 9.9438476  |
| H  | -4.8319024 | 5.5812380  | 9.8580495  |
| H  | -4.9487748 | 7.3327909  | 10.1749638 |
| C  | 0.4822201  | 10.1215113 | 8.9311308  |
| H  | -0.1341338 | 10.9600161 | 9.2602247  |
| C  | -3.6672831 | 1.3999874  | 5.2746145  |
| H  | -4.2790936 | 0.5825634  | 4.8959733  |
| C  | -4.2567717 | 2.5017632  | 5.8693315  |
| H  | -5.3434050 | 2.5520672  | 5.9588912  |
| C  | -3.7945179 | 8.1746453  | 7.7680856  |
| H  | -4.1716053 | 8.9672750  | 8.4370645  |
| H  | -4.0458815 | 8.4492399  | 6.7310208  |
| C  | 2.6583108  | 9.1184787  | 8.6226121  |
| H  | 3.7408572  | 9.1887732  | 8.7122121  |
| C  | -2.2688101 | 1.3300040  | 5.1550571  |
| H  | -1.8153127 | 0.4589521  | 4.6856937  |
| C  | 1.8597365  | 10.1951966 | 9.0443189  |
| H  | 2.3337433  | 11.0838231 | 9.4586013  |
| C  | 4.1795741  | 6.9058816  | 7.7287582  |
| H  | 4.5778929  | 7.7314246  | 7.1204400  |
| H  | 4.5496173  | 5.9526693  | 7.3293475  |
| H  | 4.5124110  | 7.0136625  | 8.7717225  |
| C  | -5.9472568 | 6.8868453  | 7.6478093  |
| H  | -6.4270308 | 7.7818249  | 8.0670585  |
| H  | -6.5246492 | 6.0217032  | 8.0000926  |
| H  | -6.0230645 | 6.9394571  | 6.5523899  |
| C  | 0.5552793  | 1.2784612  | 4.9743587  |
| H  | 0.3331407  | 0.3568014  | 5.5326315  |
| H  | 1.6343441  | 1.4754634  | 5.0202438  |
| H  | 0.2538986  | 1.1625952  | 3.9226197  |
| Ba | 1.1716655  | 4.7152885  | 6.6448700  |

**Ni (II) L<sup>en</sup>**

|    |            |            |            |
|----|------------|------------|------------|
| Ni | -1.8520921 | 6.3073483  | 7.3755024  |
| O  | -0.0328148 | 6.7035110  | 7.4439609  |
| O  | -1.2802841 | 4.6643113  | 6.7229365  |
| O  | -0.0004214 | 2.6381303  | 5.6836231  |
| O  | 2.5768101  | 6.6868395  | 7.5201063  |
| N  | -3.6501447 | 5.8553553  | 7.3893260  |
| N  | -2.3711617 | 7.9773581  | 7.9471704  |
| C  | -2.0198935 | 3.6896767  | 6.2947991  |
| C  | 0.5231755  | 7.7679570  | 7.9335249  |
| C  | -1.3598631 | 2.5429457  | 5.7147993  |
| C  | -4.5086276 | 6.8477807  | 8.1063494  |
| C  | -4.1639176 | 4.7349354  | 6.9508746  |
| H  | -5.2472209 | 4.5980152  | 7.0453156  |
| C  | 1.9661557  | 7.8095725  | 7.9939486  |
| C  | -3.4497997 | 3.6538209  | 6.3647111  |
| C  | -1.6015974 | 8.9530794  | 8.3558350  |
| H  | -2.0941304 | 9.8838336  | 8.6695286  |
| C  | -0.1821372 | 8.9194521  | 8.4145127  |
| C  | -4.4668436 | 6.5157318  | 9.6073863  |
| H  | -3.4299661 | 6.5226809  | 9.9691661  |
| H  | -4.8858211 | 5.5158369  | 9.7839032  |
| H  | -5.0520079 | 7.2482799  | 10.1820146 |
| C  | 0.5226819  | 10.0448344 | 8.9273822  |
| H  | -0.0470429 | 10.9064814 | 9.2813910  |

|   |            |            |           |
|---|------------|------------|-----------|
| C | -3.5122094 | 1.4573748  | 5.3254685 |
| H | -4.0631546 | 0.5957142  | 4.9488494 |
| C | -4.1741957 | 2.5293559  | 5.8768345 |
| H | -5.2639705 | 2.5342882  | 5.9465518 |
| C | -3.8131220 | 8.1850672  | 7.8301368 |
| H | -4.1648105 | 8.9671389  | 8.5224290 |
| H | -4.0408924 | 8.5012646  | 6.7985057 |
| C | 2.6193314  | 8.9220096  | 8.5037902 |
| H | 3.7075691  | 8.9405940  | 8.5462620 |
| C | -2.0985456 | 1.4667865  | 5.2459339 |
| H | -1.5901659 | 0.6089127  | 4.8077167 |
| C | 1.8973165  | 10.0461008 | 8.9726511 |
| H | 2.4409793  | 10.9054332 | 9.3647668 |
| C | 3.9988434  | 6.6500016  | 7.5507151 |
| H | 4.4402893  | 7.4501337  | 6.9308478 |
| H | 4.2799669  | 5.6744048  | 7.1387490 |
| H | 4.3867249  | 6.7367053  | 8.5810642 |
| C | -5.9532857 | 6.9048047  | 7.5988280 |
| H | -6.4548977 | 7.7814627  | 8.0318634 |
| H | -6.5336513 | 6.0223993  | 7.8991017 |
| H | -5.9855404 | 6.9933637  | 6.5039054 |
| C | 0.7223589  | 1.5427806  | 5.1340382 |
| H | 0.5452926  | 0.6124265  | 5.7020909 |
| H | 1.7803847  | 1.8176015  | 5.2087278 |
| H | 0.4627536  | 1.3732183  | 4.0740598 |

**Ni (II)L<sup>en</sup> + Li<sup>+</sup>**

|    |            |            |            |
|----|------------|------------|------------|
| Ni | -1.9280494 | 6.3442833  | 7.4085826  |
| O  | -0.1069050 | 6.7030384  | 7.3937380  |
| O  | -1.2964506 | 4.7024905  | 6.8258802  |
| O  | 0.0739693  | 2.8040533  | 5.7833516  |
| O  | 2.4479632  | 6.5455350  | 7.4540084  |
| N  | -3.7050272 | 5.8718903  | 7.4180673  |
| N  | -2.4238614 | 8.0139793  | 7.9641828  |
| C  | -2.0143887 | 3.7066276  | 6.3481372  |
| C  | 0.4946356  | 7.7627563  | 7.8955215  |
| C  | -1.2975453 | 2.6249244  | 5.7695112  |
| C  | -4.5697995 | 6.8717334  | 8.1321499  |
| C  | -4.1836384 | 4.7421287  | 6.9739080  |
| H  | -5.2650448 | 4.5831460  | 7.0488115  |
| C  | 1.9144315  | 7.7257514  | 7.9387086  |
| C  | -3.4307577 | 3.6654749  | 6.3931132  |
| C  | -1.6239279 | 8.9741279  | 8.3408359  |
| H  | -2.0851304 | 9.9200890  | 8.6528385  |
| C  | -0.1906316 | 8.9090897  | 8.3750469  |
| C  | -4.5258543 | 6.5359629  | 9.6319685  |
| H  | -3.4916886 | 6.5445078  | 10.0022386 |
| H  | -4.9478839 | 5.5383946  | 9.8109314  |
| H  | -5.1128457 | 7.2691496  | 10.2018183 |
| C  | 0.5626946  | 10.0029896 | 8.8760423  |
| H  | 0.0384802  | 10.8877761 | 9.2396966  |
| C  | -3.3885696 | 1.4876210  | 5.3118881  |
| H  | -3.9081153 | 0.6204879  | 4.9068771  |
| C  | -4.1027029 | 2.5302877  | 5.8688579  |
| H  | -5.1922319 | 2.4924678  | 5.9069836  |
| C  | -3.8739023 | 8.2154971  | 7.8592949  |
| H  | -4.2225115 | 8.9906102  | 8.5579668  |
| H  | -4.0984912 | 8.5409714  | 6.8312454  |
| C  | 2.6273340  | 8.8066632  | 8.4368278  |
| H  | 3.7152980  | 8.7880699  | 8.4726799  |
| C  | -1.9783382 | 1.5299503  | 5.2572816  |
| H  | -1.4386432 | 0.6970879  | 4.8092604  |
| C  | 1.9423389  | 9.9490667  | 8.9048777  |
| H  | 2.5170778  | 10.7895041 | 9.2911631  |
| C  | 3.8817986  | 6.4250095  | 7.4736752  |
| H  | 4.3500677  | 7.2004258  | 6.8485576  |
| H  | 4.1094207  | 5.4367673  | 7.0602879  |
| H  | 4.2667782  | 6.4892449  | 8.5029289  |
| C  | -6.0096611 | 6.9154405  | 7.6151382  |
| H  | -6.5231156 | 7.7845956  | 8.0476959  |
| H  | -6.5820601 | 6.0280662  | 7.9150817  |
| H  | -6.0401994 | 7.0070657  | 6.5207241  |
| C  | 0.8715750  | 1.7496603  | 5.2150504  |
| H  | 0.7196788  | 0.8052267  | 5.7596542  |
| H  | 1.9144832  | 2.0667038  | 5.3200994  |
| H  | 0.6363515  | 1.6107203  | 4.1487688  |
| Li | 0.5819960  | 5.0299883  | 6.7903441  |



**Ni (II)L<sup>en</sup> + Na<sup>+</sup>**

|    |            |            |            |
|----|------------|------------|------------|
| Ni | -1.8923800 | 6.3244008  | 7.3995150  |
| O  | -0.0631553 | 6.7084887  | 7.4324789  |
| O  | -1.2936978 | 4.6720969  | 6.7742085  |
| O  | 0.0250658  | 2.6707448  | 5.7247209  |
| O  | 2.5515719  | 6.6476764  | 7.5011259  |
| N  | -3.6782669 | 5.8637273  | 7.4081325  |
| N  | -2.3999871 | 7.9939767  | 7.9603743  |
| C  | -2.0301571 | 3.6828338  | 6.3170182  |
| C  | 0.5169795  | 7.7806488  | 7.9268556  |
| C  | -1.3580826 | 2.5638613  | 5.7402428  |
| C  | -4.5435684 | 6.8614063  | 8.1234649  |
| C  | -4.1773722 | 4.7453451  | 6.9609458  |
| H  | -5.2604475 | 4.6040270  | 7.0426103  |
| C  | 1.9432425  | 7.7995749  | 7.9790796  |
| C  | -3.4503341 | 3.6599388  | 6.3747164  |
| C  | -1.6188790 | 8.9620507  | 8.3531399  |
| H  | -2.0981201 | 9.8995136  | 8.6636818  |
| C  | -0.1893695 | 8.9210186  | 8.4022446  |
| C  | -4.4988886 | 6.5249614  | 9.6229668  |
| H  | -3.4638896 | 6.5319037  | 9.9909604  |
| H  | -4.9208127 | 5.5268575  | 9.8000419  |
| H  | -5.0845601 | 7.2573975  | 10.1953987 |
| C  | 0.5259725  | 10.0379597 | 8.9063282  |
| H  | -0.0302552 | 10.9065029 | 9.2620671  |
| C  | -3.4862313 | 1.4737975  | 5.3133866  |
| H  | -4.0314829 | 0.6160772  | 4.9224257  |
| C  | -4.1610129 | 2.5409003  | 5.8687408  |
| H  | -5.2506219 | 2.5370301  | 5.9229525  |
| C  | -3.8479465 | 8.1995027  | 7.8461898  |
| H  | -4.1971669 | 8.9800664  | 8.5386003  |
| H  | -4.0679739 | 8.5186176  | 6.8150086  |
| C  | 2.6177445  | 8.9031416  | 8.4799868  |
| H  | 3.7055068  | 8.9156957  | 8.5199875  |
| C  | -2.0769275 | 1.4843410  | 5.2483130  |
| H  | -1.5635950 | 0.6321575  | 4.8063945  |
| C  | 1.9046427  | 10.0280393 | 8.9451468  |
| H  | 2.4542404  | 10.8846155 | 9.3326300  |
| C  | 3.9890942  | 6.6092305  | 7.5470606  |
| H  | 4.4266665  | 7.4076621  | 6.9287247  |
| H  | 4.2829346  | 5.6352117  | 7.1396246  |
| H  | 4.3536125  | 6.6942820  | 8.5822125  |
| C  | -5.9840916 | 6.9085209  | 7.6072146  |
| H  | -6.4924425 | 7.7822767  | 8.0366009  |
| H  | -6.5618215 | 6.0256334  | 7.9101901  |
| H  | -6.0143482 | 6.9970472  | 6.5123628  |
| C  | 0.7520094  | 1.5749589  | 5.1421699  |
| H  | 0.5673742  | 0.6402098  | 5.6933920  |
| H  | 1.8138174  | 1.8350640  | 5.2192260  |
| H  | 0.4860863  | 1.4437914  | 4.0820610  |
| Na | 0.9797246  | 4.8223160  | 6.6893780  |

**Ni (II)L<sup>en</sup> + K<sup>+</sup>**

|    |            |            |            |
|----|------------|------------|------------|
| Ni | -1.8315826 | 6.2893282  | 7.3681977  |
| O  | 0.0152816  | 6.7109959  | 7.4631674  |
| O  | -1.2715568 | 4.6108321  | 6.7016899  |
| O  | -0.0563344 | 2.4928506  | 5.6020555  |
| O  | 2.6831818  | 6.7911753  | 7.6056463  |
| N  | -3.6296818 | 5.8395532  | 7.4047753  |
| N  | -2.3618928 | 7.9693609  | 7.8986652  |
| C  | -2.0421909 | 3.6337063  | 6.2663745  |
| C  | 0.5565707  | 7.8037965  | 7.9653734  |
| C  | -1.4405151 | 2.4771868  | 5.6702630  |
| C  | -4.4893948 | 6.8476145  | 8.1121796  |
| C  | -4.1543470 | 4.7320678  | 6.9662872  |
| H  | -5.2374389 | 4.6087146  | 7.0700284  |
| C  | 1.9838393  | 7.8959520  | 8.0636572  |
| C  | -3.4644548 | 3.6388410  | 6.3620808  |
| C  | -1.6113423 | 8.9476246  | 8.3176472  |
| H  | -2.1173352 | 9.8766888  | 8.6105947  |
| C  | -0.1895306 | 8.9328881  | 8.4169159  |
| C  | -4.4072679 | 6.5625398  | 9.6203177  |
| H  | -3.3647334 | 6.5873822  | 9.9644847  |
| H  | -4.8190086 | 5.5688908  | 9.8409267  |
| H  | -4.9847998 | 7.3106517  | 10.1806754 |
| C  | 0.4607639  | 10.0779773 | 8.9446155  |

|   |            |            |           |
|---|------------|------------|-----------|
| H | -0.1462350 | 10.9214920 | 9.2768035 |
| C | -3.6216460 | 1.4574058  | 5.3051210 |
| H | -4.2071699 | 0.6193731  | 4.9304146 |
| C | -4.2338598 | 2.5477792  | 5.8817973 |
| H | -5.3201994 | 2.5881614  | 5.9749428 |
| C | -3.8072129 | 8.1708827  | 7.7678467 |
| H | -4.1566345 | 8.9854288  | 8.4197656 |
| H | -4.0274252 | 8.4346077  | 6.7212654 |
| C | 2.5949412  | 9.0273503  | 8.5869571 |
| H | 3.6796488  | 9.0802779  | 8.6584760 |
| C | -2.2175706 | 1.4263312  | 5.2022495 |
| H | -1.7459809 | 0.5574257  | 4.7473883 |
| C | 1.8341435  | 10.1254983 | 9.0328760 |
| H | 2.3387139  | 11.0008817 | 9.4385747 |
| C | 4.1166706  | 6.8553388  | 7.6723384 |
| H | 4.5071411  | 7.6804194  | 7.0566879 |
| H | 4.4873133  | 5.9033816  | 7.2734946 |
| H | 4.4634160  | 6.9676930  | 8.7112307 |
| C | -5.9440003 | 6.8734659  | 7.6348834 |
| H | -6.4403190 | 7.7606406  | 8.0509489 |
| H | -6.5116980 | 6.0012186  | 7.9840359 |
| H | -6.0081481 | 6.9275858  | 6.5391628 |
| C | 0.5781646  | 1.3407070  | 5.0230231 |
| H | 0.3507887  | 0.4297296  | 5.5980987 |
| H | 1.6575505  | 1.5303000  | 5.0642262 |
| H | 0.2780517  | 1.2044232  | 3.9725013 |
| K | 1.3837258  | 4.6126818  | 6.5705704 |

**Ni (II)L<sup>en</sup> + Mg<sup>2+</sup>**

|    |            |            |            |
|----|------------|------------|------------|
| Ni | -2.0181902 | 6.3787872  | 7.4273415  |
| O  | -0.2532403 | 6.8000219  | 7.0564545  |
| O  | -1.3294813 | 4.6742242  | 7.2144185  |
| O  | 0.1976485  | 3.1189777  | 5.9212100  |
| O  | 2.2043742  | 6.2872387  | 7.3506829  |
| N  | -3.7713876 | 5.8557454  | 7.5248585  |
| N  | -2.5023111 | 8.0827917  | 7.8637128  |
| C  | -1.9888742 | 3.7112005  | 6.5651157  |
| C  | 0.4099042  | 7.7711335  | 7.6883098  |
| C  | -1.1904623 | 2.7862041  | 5.8793766  |
| C  | -4.6332654 | 6.9021901  | 8.1832228  |
| C  | -4.2088124 | 4.6976202  | 7.1180174  |
| H  | -5.2850482 | 4.5027913  | 7.1820398  |
| C  | 1.7881552  | 7.5641723  | 7.8314648  |
| C  | -3.3961161 | 3.6398706  | 6.5375227  |
| C  | -1.6739428 | 9.0381965  | 8.1812577  |
| H  | -2.0983758 | 10.0059282 | 8.4768148  |
| C  | -0.2263745 | 8.9162356  | 8.2101371  |
| C  | -4.5408464 | 6.6750695  | 9.7010825  |
| H  | -3.4987575 | 6.7238830  | 10.0462604 |
| H  | -4.9476895 | 5.6906759  | 9.9659396  |
| H  | -5.1229748 | 7.4425641  | 10.2279317 |
| C  | 0.6001734  | 9.9037938  | 8.7951781  |
| H  | 0.1526004  | 10.8138858 | 9.1964807  |
| C  | -3.1705258 | 1.5848725  | 5.2496547  |
| H  | -3.6281307 | 0.7368431  | 4.7419494  |
| C  | -3.9732083 | 2.5294996  | 5.8783684  |
| H  | -5.0582930 | 2.4247099  | 5.8477601  |
| C  | -3.9632707 | 8.2431182  | 7.7931289  |
| H  | -4.3102808 | 9.0589026  | 8.4431228  |
| H  | -4.2166142 | 8.4910790  | 6.7511325  |
| C  | 2.5882879  | 8.5322572  | 8.4184865  |
| H  | 3.6634810  | 8.4054063  | 8.5358196  |
| C  | -1.7660723 | 1.7088941  | 5.2239493  |
| H  | -1.1724977 | 0.9704343  | 4.6880445  |
| C  | 1.9744513  | 9.7138333  | 8.8830563  |
| H  | 2.5992100  | 10.4807905 | 9.3388030  |
| C  | 3.6448056  | 6.0277094  | 7.3629707  |
| H  | 4.1581649  | 6.7835443  | 6.7559573  |
| H  | 3.7811037  | 5.0367662  | 6.9164193  |
| H  | 4.0157202  | 6.0277669  | 8.3956702  |
| C  | -6.0815799 | 6.8797758  | 7.6948711  |
| H  | -6.6093050 | 7.7603441  | 8.0839230  |
| H  | -6.6233449 | 6.0003516  | 8.0655186  |
| H  | -6.1390887 | 6.9041548  | 6.5978068  |
| C  | 1.1164084  | 2.1461697  | 5.3259332  |
| H  | 0.9997011  | 1.1783635  | 5.8293712  |
| H  | 2.1253394  | 2.5366554  | 5.4973840  |

|    |           |           |           |
|----|-----------|-----------|-----------|
| H  | 0.9246695 | 2.0619505 | 4.2487689 |
| Mg | 0.5625636 | 5.0297055 | 6.7995986 |

**Ni (II)L<sup>en</sup> + Ca<sup>2+</sup>**

|    |            |            |            |
|----|------------|------------|------------|
| Ni | -1.9294919 | 6.3427171  | 7.4107687  |
| O  | -0.0914223 | 6.7191386  | 7.3833615  |
| O  | -1.2984199 | 4.6775837  | 6.8320032  |
| O  | 0.0632062  | 2.7663131  | 5.7620540  |
| O  | 2.4819044  | 6.5700143  | 7.4726517  |
| N  | -3.7075571 | 5.8689901  | 7.4257357  |
| N  | -2.4272693 | 8.0171827  | 7.9576766  |
| C  | -2.0348368 | 3.6744723  | 6.3403644  |
| C  | 0.5120662  | 7.7945306  | 7.9030140  |
| C  | -1.3369301 | 2.5987848  | 5.7589457  |
| C  | -4.5763376 | 6.8766481  | 8.1389351  |
| C  | -4.1896428 | 4.7468398  | 6.9775923  |
| H  | -5.2724039 | 4.5972815  | 7.0507191  |
| C  | 1.9188691  | 7.7675106  | 7.9598648  |
| C  | -3.4453013 | 3.6579448  | 6.3915787  |
| C  | -1.6328683 | 8.9777751  | 8.3336497  |
| H  | -2.0977892 | 9.9229183  | 8.6414544  |
| C  | -0.1924289 | 8.9240934  | 8.3763228  |
| C  | -4.5244040 | 6.5438533  | 9.6388867  |
| H  | -3.4909732 | 6.5535132  | 10.0120509 |
| H  | -4.9497698 | 5.5490531  | 9.8240706  |
| H  | -5.1102441 | 7.2799105  | 10.2053821 |
| C  | 0.5477121  | 10.0183177 | 8.8851109  |
| H  | 0.0170942  | 10.8990995 | 9.2482245  |
| C  | -3.4239067 | 1.4810427  | 5.3034221  |
| H  | -3.9557511 | 0.6215270  | 4.8987779  |
| C  | -4.1265741 | 2.5345248  | 5.8649596  |
| H  | -5.2160522 | 2.5055455  | 5.9018415  |
| C  | -3.8819871 | 8.2156285  | 7.8504054  |
| H  | -4.2270457 | 8.9984672  | 8.5406173  |
| H  | -4.0999536 | 8.5319364  | 6.8186199  |
| C  | 2.6312339  | 8.8464116  | 8.4644230  |
| H  | 3.7187124  | 8.8379949  | 8.5121936  |
| C  | -2.0181408 | 1.5052165  | 5.2433075  |
| H  | -1.4902817 | 0.6666070  | 4.7926291  |
| C  | 1.9316935  | 9.9767781  | 8.9261760  |
| H  | 2.4936126  | 10.8218238 | 9.3205413  |
| C  | 3.9363438  | 6.4815744  | 7.4976075  |
| H  | 4.3763814  | 7.2661407  | 6.8682275  |
| H  | 4.1919386  | 5.4974067  | 7.0867780  |
| H  | 4.3046392  | 6.5539466  | 8.5294061  |
| C  | -6.0159116 | 6.9110171  | 7.6216953  |
| H  | -6.5301884 | 7.7811012  | 8.0510292  |
| H  | -6.5869946 | 6.0265435  | 7.9322363  |
| H  | -6.0515449 | 6.9992939  | 6.5271032  |
| C  | 0.8463316  | 1.6826302  | 5.1829528  |
| H  | 0.6777214  | 0.7517863  | 5.7402492  |
| H  | 1.8981761  | 1.9781951  | 5.2763188  |
| H  | 0.5944115  | 1.5553758  | 4.1218940  |
| Ca | 0.8987749  | 4.8640981  | 6.7084693  |

**Ni (II)L<sup>en</sup> + Ba<sup>2+</sup>**

|    |            |           |           |
|----|------------|-----------|-----------|
| Ni | -1.8446542 | 6.2923659 | 7.3796326 |
| O  | 0.0207650  | 6.7065146 | 7.4535864 |
| O  | -1.2632234 | 4.5978628 | 6.7275463 |
| O  | -0.0456850 | 2.5108033 | 5.6203049 |
| O  | 2.6695186  | 6.7681663 | 7.6052568 |
| N  | -3.6390704 | 5.8398366 | 7.4141868 |
| N  | -2.3717283 | 7.9754452 | 7.8994105 |
| C  | -2.0501970 | 3.6092956 | 6.2680745 |
| C  | 0.5720070  | 7.8209659 | 7.9659061 |
| C  | -1.4458834 | 2.4754853 | 5.6737390 |
| C  | -4.5028196 | 6.8537162 | 8.1229823 |
| C  | -4.1561249 | 4.7359692 | 6.9685455 |
| H  | -5.2399862 | 4.6139817 | 7.0658351 |
| C  | 1.9821843  | 7.9002724 | 8.0639048 |
| C  | -3.4624963 | 3.6361743 | 6.3610156 |
| C  | -1.6153980 | 8.9494599 | 8.3079213 |
| H  | -2.1154814 | 9.8828588 | 8.5954745 |
| C  | -0.1853916 | 8.9345998 | 8.4061037 |
| C  | -4.4128463 | 6.5689812 | 9.6304059 |
| H  | -3.3714822 | 6.5965871 | 9.9787150 |
| H  | -4.8268385 | 5.5777482 | 9.8558689 |

|    |            |            |            |
|----|------------|------------|------------|
| H  | -4.9906553 | 7.3182101  | 10.1878966 |
| C  | 0.4679924  | 10.0762868 | 8.9293152  |
| H  | -0.1319185 | 10.9245737 | 9.2607452  |
| C  | -3.6090269 | 1.4596937  | 5.2867147  |
| H  | -4.1970040 | 0.6268983  | 4.9047769  |
| C  | -4.2260142 | 2.5512586  | 5.8673928  |
| H  | -5.3128375 | 2.5877653  | 5.9492584  |
| C  | -3.8220347 | 8.1747871  | 7.7686685  |
| H  | -4.1672116 | 8.9926604  | 8.4166965  |
| H  | -4.0358968 | 8.4355941  | 6.7207015  |
| C  | 2.6091015  | 9.0270434  | 8.5820392  |
| H  | 3.6937752  | 9.0777756  | 8.6548999  |
| C  | -2.2093818 | 1.4201837  | 5.1896052  |
| H  | -1.7363287 | 0.5534606  | 4.7322602  |
| C  | 1.8460502  | 10.1212801 | 9.0191460  |
| H  | 2.3481832  | 10.9984411 | 9.4235807  |
| C  | 4.1202755  | 6.8148905  | 7.6628961  |
| H  | 4.5049445  | 7.6309545  | 7.0365592  |
| H  | 4.4766719  | 5.8556862  | 7.2664587  |
| H  | 4.4631790  | 6.9250636  | 8.7004134  |
| C  | -5.9565240 | 6.8671462  | 7.6457057  |
| H  | -6.4581184 | 7.7498845  | 8.0639563  |
| H  | -6.5175881 | 5.9930090  | 8.0006734  |
| H  | -6.0265339 | 6.9231013  | 6.5505379  |
| C  | 0.6166403  | 1.3614424  | 5.0283270  |
| H  | 0.3938174  | 0.4505974  | 5.6002831  |
| H  | 1.6937853  | 1.5652208  | 5.0796887  |
| H  | 0.3220298  | 1.2432463  | 3.9768416  |
| Ba | 1.2538601  | 4.6638540  | 6.6418444  |

#### Ni (I) L<sup>pn</sup>

|    |           |            |            |
|----|-----------|------------|------------|
| Ni | 4.6788985 | 0.2599937  | 6.4426565  |
| O  | 5.9039854 | -0.4498302 | 5.0290233  |
| O  | 4.5019696 | 1.7410766  | 5.1013331  |
| O  | 7.6101970 | -0.6464179 | 3.0174687  |
| O  | 5.0281009 | 3.4710905  | 3.1694768  |
| N  | 5.0754671 | -1.2902316 | 7.5752000  |
| N  | 3.4882869 | 1.2316198  | 7.6638340  |
| C  | 4.1693457 | 2.9562668  | 5.3160229  |
| C  | 6.8401433 | -1.3103389 | 5.1564516  |
| C  | 7.8182258 | -1.4768353 | 4.0931840  |
| C  | 7.0122128 | -2.1580306 | 6.3119815  |
| C  | 6.1106847 | -2.0884272 | 7.4163353  |
| H  | 6.3269515 | -2.8008016 | 8.2348726  |
| C  | 3.5403345 | 3.4236822  | 6.5286839  |
| C  | 4.4240898 | 3.9663982  | 4.3011974  |
| C  | 8.8489668 | -2.3989784 | 4.1866636  |
| H  | 9.5678334 | -2.5064296 | 3.3732776  |
| C  | 2.9572967 | 0.5845106  | 8.8579956  |
| H  | 2.1046405 | -0.0545552 | 8.5605984  |
| H  | 2.5606163 | 1.3476957  | 9.5607183  |
| C  | 3.2367283 | 2.5222208  | 7.5931039  |
| H  | 2.7295355 | 2.9847230  | 8.4612329  |
| C  | 3.9643067 | -0.2980973 | 9.6202891  |
| C  | 8.0841692 | -3.0898875 | 6.3719771  |
| H  | 8.1788615 | -3.7153929 | 7.2653569  |
| C  | 4.3051853 | -1.5485471 | 8.7873595  |
| H  | 4.8491108 | -2.2646129 | 9.4394294  |
| H  | 3.3531930 | -2.0342945 | 8.5002780  |
| C  | 8.9881928 | -3.2156948 | 5.3379131  |
| H  | 9.8064190 | -3.9356273 | 5.3931184  |
| C  | 5.2334661 | 0.4940291  | 9.9553763  |
| H  | 5.7267604 | 0.8268740  | 9.0316083  |
| H  | 5.9420271 | -0.1283880 | 10.5236172 |
| H  | 4.9886028 | 1.3831031  | 10.5573190 |
| C  | 4.0729906 | 5.2947948  | 4.4870494  |
| H  | 4.2698094 | 6.0310132  | 3.7067923  |
| C  | 3.1994505 | 4.7952902  | 6.6843059  |
| H  | 2.7216163 | 5.1092898  | 7.6177766  |
| C  | 3.4553018 | 5.7186053  | 5.6917134  |
| H  | 3.1862749 | 6.7683574  | 5.8199124  |
| C  | 3.2781484 | -0.7738272 | 10.9116377 |
| H  | 3.0040155 | 0.0818069  | 11.5478084 |
| H  | 3.9468302 | -1.4266152 | 11.4932682 |
| H  | 2.3587394 | -1.3402444 | 10.6910883 |
| C  | 8.5374375 | -0.7187150 | 1.9544860  |
| H  | 9.5652570 | -0.4702030 | 2.2827808  |

|   |           |            |           |
|---|-----------|------------|-----------|
| H | 8.2074165 | 0.0211055  | 1.2140318 |
| H | 8.5548621 | -1.7205314 | 1.4826923 |
| C | 5.3420112 | 4.3931081  | 2.1463045 |
| H | 4.4379809 | 4.8791440  | 1.7307188 |
| H | 5.8333287 | 3.8119541  | 1.3554217 |
| H | 6.0325551 | 5.1841170  | 2.4973794 |

**Ni (I) L<sup>pn</sup> + Li<sup>+</sup>**

|    |           |            |            |
|----|-----------|------------|------------|
| Ni | 4.3857970 | 0.0761614  | 6.4792675  |
| O  | 5.5095646 | -0.6384333 | 4.9422793  |
| O  | 4.2065983 | 1.4875086  | 5.0261348  |
| O  | 7.2710364 | -0.3252685 | 3.0814145  |
| O  | 5.2084677 | 3.0360183  | 3.2236080  |
| N  | 4.9353483 | -1.3999942 | 7.5970707  |
| N  | 3.3342271 | 1.1538741  | 7.6877310  |
| C  | 4.0708387 | 2.7608058  | 5.2615639  |
| C  | 6.6028913 | -1.3275512 | 5.1008843  |
| C  | 7.6036493 | -1.2393391 | 4.0855176  |
| C  | 6.8754914 | -2.1283368 | 6.2499733  |
| C  | 6.0036421 | -2.1353973 | 7.3980741  |
| H  | 6.3110945 | -2.8150575 | 8.2106430  |
| C  | 3.4989697 | 3.2900725  | 6.4570208  |
| C  | 4.5621591 | 3.6780245  | 4.2832289  |
| C  | 8.7696590 | -1.9845039 | 4.1425164  |
| H  | 9.5184930 | -1.9250481 | 3.3533988  |
| C  | 2.8758469 | 0.5467563  | 8.9367099  |
| H  | 2.0081992 | -0.0946471 | 8.7037232  |
| H  | 2.5291925 | 1.3316583  | 9.6367966  |
| C  | 3.1373217 | 2.4453271  | 7.5676324  |
| H  | 2.6807656 | 2.9718273  | 8.4232380  |
| C  | 3.9359885 | -0.3172604 | 9.6592149  |
| C  | 8.0741306 | -2.8858617 | 6.2841566  |
| H  | 8.2722951 | -3.5129243 | 7.1567651  |
| C  | 4.2389351 | -1.6102057 | 8.8664593  |
| H  | 4.8268298 | -2.2878435 | 9.5159907  |
| H  | 3.2806579 | -2.1138950 | 8.6480977  |
| C  | 8.9951330 | -2.8296836 | 5.2527928  |
| H  | 9.9095724 | -3.4207022 | 5.2957458  |
| C  | 5.2204217 | 0.4876271  | 9.8923324  |
| H  | 5.6668160 | 0.7927479  | 8.9358648  |
| H  | 5.9606475 | -0.1120148 | 10.4426334 |
| H  | 5.0095420 | 1.3952935  | 10.4776435 |
| C  | 4.4070361 | 5.0474025  | 4.4228634  |
| H  | 4.7689906 | 5.7393810  | 3.6630366  |
| C  | 3.3446338 | 4.6950985  | 6.5749505  |
| H  | 2.8873594 | 5.0966618  | 7.4824122  |
| C  | 3.7746579 | 5.5560474  | 5.5804056  |
| H  | 3.6463848 | 6.6327074  | 5.6884538  |
| C  | 3.3268869 | -0.7457544 | 11.0058478 |
| H  | 3.0862086 | 0.1319810  | 11.6234220 |
| H  | 4.0321488 | -1.3706339 | 11.5729584 |
| H  | 2.4004193 | -1.3237912 | 10.8639871 |
| C  | 8.2199111 | -0.1532022 | 2.0276207  |
| H  | 9.1868087 | 0.2081482  | 2.4151418  |
| H  | 7.7954030 | 0.5969736  | 1.3495958  |
| H  | 8.3760341 | -1.0941066 | 1.4750615  |
| C  | 5.7555256 | 3.8727723  | 2.2036555  |
| H  | 4.9670527 | 4.4584470  | 1.7036732  |
| H  | 6.2256179 | 3.2029255  | 1.4736367  |
| H  | 6.5151942 | 4.5586233  | 2.6142320  |
| Li | 5.4477031 | 0.8368843  | 3.7610213  |

**Ni (I) L<sup>pn</sup> + Na<sup>+</sup>**

|    |           |            |           |
|----|-----------|------------|-----------|
| Ni | 4.7297112 | 0.2903236  | 6.5332718 |
| O  | 5.9863896 | -0.3962884 | 5.0852877 |
| O  | 4.6193273 | 1.7972595  | 5.1678117 |
| O  | 7.6975641 | -0.5699225 | 3.0791489 |
| O  | 5.1358616 | 3.5120009  | 3.2194694 |
| N  | 5.1119463 | -1.2857749 | 7.6113184 |
| N  | 3.5280717 | 1.2715528  | 7.7102501 |
| C  | 4.1819897 | 3.0081590  | 5.3367996 |
| C  | 6.8803909 | -1.3339514 | 5.1738602 |
| C  | 7.8393199 | -1.4951565 | 4.1174765 |
| C  | 6.9780047 | -2.2267644 | 6.2858081 |
| C  | 6.0837365 | -2.1419009 | 7.4078133 |
| H  | 6.2564589 | -2.9053917 | 8.1858445 |
| C  | 3.4738629 | 3.4326822  | 6.5043265 |

|    |           |            |            |
|----|-----------|------------|------------|
| C  | 4.4185573 | 3.9942626  | 4.3197249  |
| C  | 8.8086857 | -2.4848466 | 4.1513318  |
| H  | 9.5255016 | -2.5973330 | 3.3385998  |
| C  | 3.0029674 | 0.6172593  | 8.9110395  |
| H  | 2.1472764 | -0.0113931 | 8.6062363  |
| H  | 2.6142377 | 1.3779392  | 9.6157732  |
| C  | 3.1927076 | 2.5332508  | 7.5901983  |
| H  | 2.6179238 | 2.9845379  | 8.4174489  |
| C  | 4.0101909 | -0.2758522 | 9.6601350  |
| C  | 7.9806914 | -3.2285975 | 6.2960335  |
| H  | 8.0339885 | -3.9036399 | 7.1537142  |
| C  | 4.3339612 | -1.5317058 | 8.8281939  |
| H  | 4.8650072 | -2.2562505 | 9.4760452  |
| H  | 3.3796299 | -2.0016119 | 8.5295471  |
| C  | 8.8780554 | -3.3638549 | 5.2538148  |
| H  | 9.6419067 | -4.1407079 | 5.2737512  |
| C  | 5.2870602 | 0.5028674  | 10.0007461 |
| H  | 5.7907559 | 0.8443214  | 9.0857330  |
| H  | 5.9879936 | -0.1299936 | 10.5652834 |
| H  | 5.0498808 | 1.3857089  | 10.6132705 |
| C  | 3.9691981 | 5.2994702  | 4.4435545  |
| H  | 4.1530294 | 6.0330732  | 3.6595352  |
| C  | 3.0277677 | 4.7745152  | 6.6066039  |
| H  | 2.4850297 | 5.0765385  | 7.5056311  |
| C  | 3.2634481 | 5.6933650  | 5.6012152  |
| H  | 2.9123567 | 6.7208752  | 5.6920370  |
| C  | 3.3216215 | -0.7512389 | 10.9515323 |
| H  | 3.0557746 | 0.1038244  | 11.5903219 |
| H  | 3.9873676 | -1.4078398 | 11.5304156 |
| H  | 2.3986548 | -1.3111155 | 10.7332644 |
| C  | 8.6086158 | -0.6873095 | 1.9868899  |
| H  | 9.6521965 | -0.5447979 | 2.3144427  |
| H  | 8.3439766 | 0.1043846  | 1.2747612  |
| H  | 8.5147920 | -1.6664618 | 1.4886554  |
| C  | 5.3778590 | 4.4349213  | 2.1573912  |
| H  | 4.4341881 | 4.8069458  | 1.7254949  |
| H  | 5.9326445 | 3.8835823  | 1.3875027  |
| H  | 5.9845632 | 5.2910761  | 2.4967323  |
| Na | 5.9615011 | 1.1713034  | 3.5270112  |

**Ni (I) L<sup>Pn</sup> + K<sup>+</sup>**

|    |           |            |            |
|----|-----------|------------|------------|
| Ni | 4.6730235 | 0.2598653  | 6.4574589  |
| O  | 5.9068309 | -0.4989959 | 4.9940599  |
| O  | 4.4772202 | 1.7773545  | 5.0755625  |
| O  | 7.6411110 | -0.7690073 | 2.9741152  |
| O  | 4.9113517 | 3.5512083  | 3.1188501  |
| N  | 5.0803627 | -1.2881680 | 7.5762385  |
| N  | 3.5200345 | 1.2539448  | 7.6802470  |
| C  | 4.1522801 | 3.0123328  | 5.3141467  |
| C  | 6.8712300 | -1.3556807 | 5.1534451  |
| C  | 7.8471951 | -1.5495587 | 4.1123563  |
| C  | 7.0365868 | -2.1498945 | 6.3343368  |
| C  | 6.1159290 | -2.0775771 | 7.4323536  |
| H  | 6.3235215 | -2.7921489 | 8.2475760  |
| C  | 3.5771384 | 3.4530093  | 6.5508100  |
| C  | 4.3617765 | 4.0251973  | 4.3117497  |
| C  | 8.8967421 | -2.4464582 | 4.2437410  |
| H  | 9.6237022 | -2.5750831 | 3.4426197  |
| C  | 2.9728952 | 0.5983087  | 8.8695105  |
| H  | 2.1152231 | -0.0202839 | 8.5505764  |
| H  | 2.5825907 | 1.3590873  | 9.5733909  |
| C  | 3.2770920 | 2.5396057  | 7.6164935  |
| H  | 2.7671204 | 3.0003504  | 8.4803842  |
| C  | 3.9634399 | -0.3057425 | 9.6246038  |
| C  | 8.1181633 | -3.0600944 | 6.4401372  |
| H  | 8.2122232 | -3.6506853 | 7.3548018  |
| C  | 4.2886465 | -1.5508863 | 8.7796082  |
| H  | 4.8111992 | -2.2865110 | 9.4221211  |
| H  | 3.3361629 | -2.0131605 | 8.4647217  |
| C  | 9.0376767 | -3.2102365 | 5.4213503  |
| H  | 9.8665937 | -3.9115361 | 5.5135645  |
| C  | 5.2416596 | 0.4634168  | 9.9805622  |
| H  | 5.7543965 | 0.8062781  | 9.0712615  |
| H  | 5.9343682 | -0.1761839 | 10.5476681 |
| H  | 5.0045238 | 1.3445003  | 10.5956052 |
| C  | 4.0373963 | 5.3559412  | 4.5284482  |
| H  | 4.2065665 | 6.1033735  | 3.7543055  |

|   |           |            |            |
|---|-----------|------------|------------|
| C | 3.2551482 | 4.8201342  | 6.7442032  |
| H | 2.8166431 | 5.1207632  | 7.6990704  |
| C | 3.4797530 | 5.7615015  | 5.7593232  |
| H | 3.2290003 | 6.8098814  | 5.9187375  |
| C | 3.2601758 | -0.7891380 | 10.9043347 |
| H | 2.9918093 | 0.0613265  | 11.5482828 |
| H | 3.9170882 | -1.4539750 | 11.4839521 |
| H | 2.3369875 | -1.3429020 | 10.6716402 |
| C | 8.6202422 | -0.8685101 | 1.9430942  |
| H | 9.6220189 | -0.5854880 | 2.3077127  |
| H | 8.3156871 | -0.1667804 | 1.1556485  |
| H | 8.6642797 | -1.8863803 | 1.5192494  |
| C | 5.2062162 | 4.5215459  | 2.1173429  |
| H | 4.2941876 | 5.0295977  | 1.7602808  |
| H | 5.6623726 | 3.9770400  | 1.2801174  |
| H | 5.9207505 | 5.2773208  | 2.4846893  |
| K | 5.3178650 | 0.7944809  | 2.8716380  |

**Ni (I) L<sup>pn</sup> + Mg<sup>2+</sup>**

|    |            |            |            |
|----|------------|------------|------------|
| Ni | 4.2712349  | 0.0059022  | 6.4853889  |
| O  | 5.3400604  | -0.7702037 | 4.9049439  |
| O  | 3.9912780  | 1.3922212  | 4.9858797  |
| O  | 7.1020315  | -0.1709016 | 3.1150520  |
| O  | 5.2584416  | 2.8071552  | 3.2359159  |
| N  | 4.8995438  | -1.4315713 | 7.6012474  |
| N  | 3.2883121  | 1.1373231  | 7.6939803  |
| C  | 4.0227597  | 2.6948250  | 5.2456308  |
| C  | 6.5292454  | -1.3323746 | 5.0906184  |
| C  | 7.5220682  | -1.1068213 | 4.1132850  |
| C  | 6.8560965  | -2.0819427 | 6.2463149  |
| C  | 5.9770724  | -2.1423956 | 7.4003325  |
| H  | 6.3040884  | -2.8229395 | 8.2014051  |
| C  | 3.5301846  | 3.2531511  | 6.4499378  |
| C  | 4.6364277  | 3.5397658  | 4.2963144  |
| C  | 8.7712532  | -1.7009996 | 4.1732705  |
| H  | 9.5280842  | -1.5382565 | 3.4079083  |
| C  | 2.8323058  | 0.5267420  | 8.9466782  |
| H  | 1.9633916  | -0.1077895 | 8.7063461  |
| H  | 2.4907874  | 1.3100952  | 9.6469363  |
| C  | 3.1203390  | 2.4268632  | 7.5710147  |
| H  | 2.6768924  | 2.9735937  | 8.4178018  |
| C  | 3.8974422  | -0.3414620 | 9.6601215  |
| C  | 8.1258698  | -2.7020521 | 6.2918878  |
| H  | 8.3852060  | -3.3068187 | 7.1625771  |
| C  | 4.1977209  | -1.6399279 | 8.8723530  |
| H  | 4.7821058  | -2.3173220 | 9.5209245  |
| H  | 3.2430813  | -2.1419654 | 8.6422202  |
| C  | 9.0544480  | -2.5339919 | 5.2728779  |
| H  | 10.0253885 | -3.0233932 | 5.3299643  |
| C  | 5.1837346  | 0.4619167  | 9.8900472  |
| H  | 5.6340231  | 0.7716661  | 8.9363808  |
| H  | 5.9230697  | -0.1379157 | 10.4398526 |
| H  | 4.9760611  | 1.3665622  | 10.4797773 |
| C  | 4.6593958  | 4.9172983  | 4.4340907  |
| H  | 5.1181122  | 5.5671807  | 3.6907492  |
| C  | 3.5387112  | 4.6612379  | 6.5752979  |
| H  | 3.1370965  | 5.1107240  | 7.4851613  |
| C  | 4.0708638  | 5.4764112  | 5.5848330  |
| H  | 4.0641526  | 6.5587158  | 5.7032914  |
| C  | 3.2902587  | -0.7697733 | 11.0085744 |
| H  | 3.0537728  | 0.1082329  | 11.6259926 |
| H  | 3.9974520  | -1.3926145 | 11.5739723 |
| H  | 2.3636146  | -1.3471518 | 10.8710889 |
| C  | 8.0115620  | 0.0646395  | 2.0138626  |
| H  | 8.9433720  | 0.5184115  | 2.3773348  |
| H  | 7.5003584  | 0.7549635  | 1.3338229  |
| H  | 8.2191292  | -0.8788303 | 1.4921858  |
| C  | 5.8403759  | 3.5812701  | 2.1601181  |
| H  | 5.0727283  | 4.2160838  | 1.6986700  |
| H  | 6.2093019  | 2.8583154  | 1.4243717  |
| H  | 6.6729309  | 4.1919407  | 2.5351527  |
| Mg | 5.3509612  | 0.7825063  | 3.7543420  |

**Ni (I) L<sup>pn</sup> + Ca<sup>2+</sup>**

|    |           |            |           |
|----|-----------|------------|-----------|
| Ni | 4.6839230 | 0.2589353  | 6.5724282 |
| O  | 5.9422243 | -0.4081093 | 5.0689950 |
| O  | 4.5845750 | 1.7609645  | 5.1512546 |

|    |           |            |            |
|----|-----------|------------|------------|
| O  | 7.6345949 | -0.5067385 | 3.0932768  |
| O  | 5.1919096 | 3.4378230  | 3.2483229  |
| N  | 5.1124277 | -1.3020987 | 7.6312038  |
| N  | 3.4976678 | 1.2659596  | 7.7230723  |
| C  | 4.1580152 | 3.0037609  | 5.3308200  |
| C  | 6.8718885 | -1.3487472 | 5.1656280  |
| C  | 7.8162630 | -1.4676861 | 4.1182101  |
| C  | 6.9701427 | -2.2241321 | 6.2752836  |
| C  | 6.0778646 | -2.1545427 | 7.4125587  |
| H  | 6.2589378 | -2.9265967 | 8.1766882  |
| C  | 3.4507816 | 3.4141209  | 6.4884323  |
| C  | 4.4407302 | 3.9638914  | 4.3295971  |
| C  | 8.8136324 | -2.4299074 | 4.1285430  |
| H  | 9.5338673 | -2.5176819 | 3.3168134  |
| C  | 2.9818972 | 0.6045651  | 8.9298297  |
| H  | 2.1347668 | -0.0298671 | 8.6184293  |
| H  | 2.5861570 | 1.3613577  | 9.6308158  |
| C  | 3.1525501 | 2.5182947  | 7.5858073  |
| H  | 2.5630848 | 2.9763660  | 8.3957844  |
| C  | 4.0039121 | -0.2769003 | 9.6761948  |
| C  | 7.9916381 | -3.2032580 | 6.2712563  |
| H  | 8.0660726 | -3.8854566 | 7.1200255  |
| C  | 4.3368238 | -1.5406267 | 8.8571340  |
| H  | 4.8751723 | -2.2534130 | 9.5074841  |
| H  | 3.3902295 | -2.0217215 | 8.5564574  |
| C  | 8.8911711 | -3.3106005 | 5.2229285  |
| H  | 9.6688990 | -4.0725729 | 5.2398422  |
| C  | 5.2742648 | 0.5153720  | 10.0116912 |
| H  | 5.7813251 | 0.8605798  | 9.0996145  |
| H  | 5.9797018 | -0.1064839 | 10.5811930 |
| H  | 5.0302081 | 1.3974138  | 10.6213311 |
| C  | 4.0221982 | 5.2816459  | 4.4297857  |
| H  | 4.2396728 | 6.0127079  | 3.6530780  |
| C  | 3.0269278 | 4.7615153  | 6.5761876  |
| H  | 2.4744886 | 5.0802336  | 7.4618583  |
| C  | 3.2995566 | 5.6758150  | 5.5709942  |
| H  | 2.9634780 | 6.7078617  | 5.6585550  |
| C  | 3.3212980 | -0.7520857 | 10.9721633 |
| H  | 3.0533894 | 0.1033969  | 11.6082101 |
| H  | 3.9940511 | -1.3993609 | 11.5519860 |
| H  | 2.4020357 | -1.3196334 | 10.7619004 |
| C  | 8.5345338 | -0.5861502 | 1.9670946  |
| H  | 9.5735524 | -0.4221956 | 2.2870165  |
| H  | 8.2378131 | 0.2111227  | 1.2738664  |
| H  | 8.4404332 | -1.5588821 | 1.4639809  |
| C  | 5.5020581 | 4.3509836  | 2.1735299  |
| H  | 4.5807490 | 4.7311262  | 1.7104160  |
| H  | 6.0708820 | 3.7762528  | 1.4313899  |
| H  | 6.1176849 | 5.1858724  | 2.5373168  |
| Ca | 5.8520769 | 1.1038103  | 3.5318234  |

**Ni (I) L<sup>Pn</sup> + Ba<sup>2+</sup>**

|    |           |            |           |
|----|-----------|------------|-----------|
| Ni | 4.6136084 | 0.2195059  | 6.4855534 |
| O  | 5.8316374 | -0.5379817 | 4.9672591 |
| O  | 4.4140826 | 1.7292397  | 5.0534094 |
| O  | 7.5447606 | -0.7289784 | 2.9679730 |
| O  | 4.9351470 | 3.4593474  | 3.1258699 |
| N  | 5.0726004 | -1.3073004 | 7.5927178 |
| N  | 3.4838573 | 1.2422186  | 7.6887283 |
| C  | 4.1263558 | 3.0000966  | 5.3071807 |
| C  | 6.8496919 | -1.3728230 | 5.1409951 |
| C  | 7.8102456 | -1.5155969 | 4.1056449 |
| C  | 7.0292112 | -2.1351664 | 6.3247645 |
| C  | 6.1098691 | -2.0838845 | 7.4375317 |
| H  | 6.3323307 | -2.8027239 | 8.2418048 |
| C  | 3.5694199 | 3.4319946  | 6.5396119 |
| C  | 4.3869134 | 3.9812327  | 4.3146025 |
| C  | 8.9024922 | -2.3629718 | 4.2235223 |
| H  | 9.6338504 | -2.4592121 | 3.4228303 |
| C  | 2.9450094 | 0.5807627  | 8.8836209 |
| H  | 2.0956692 | -0.0437403 | 8.5590170 |
| H  | 2.5485079 | 1.3384227  | 9.5833753 |
| C  | 3.2465412 | 2.5232889  | 7.6152686 |
| H  | 2.7316250 | 2.9951571  | 8.4672387 |
| C  | 3.9503104 | -0.3109480 | 9.6370029 |
| C  | 8.1434162 | -3.0016928 | 6.4243153 |
| H  | 8.2686438 | -3.5886373 | 7.3359865 |



|    |           |            |            |
|----|-----------|------------|------------|
| C  | 4.2844920 | -1.5640815 | 8.8051653  |
| H  | 4.8154107 | -2.2873855 | 9.4503600  |
| H  | 3.3398843 | -2.0382923 | 8.4888823  |
| C  | 9.0668257 | -3.1145458 | 5.3998814  |
| H  | 9.9210691 | -3.7833491 | 5.4942251  |
| C  | 5.2221345 | 0.4722709  | 9.9868172  |
| H  | 5.7357880 | 0.8218163  | 9.0802859  |
| H  | 5.9214583 | -0.1570449 | 10.5557401 |
| H  | 4.9786420 | 1.3506796  | 10.6019338 |
| C  | 4.1176385 | 5.3270876  | 4.5178827  |
| H  | 4.3258774 | 6.0682656  | 3.7483682  |
| C  | 3.2940875 | 4.8072563  | 6.7273549  |
| H  | 2.8604376 | 5.1286493  | 7.6760612  |
| C  | 3.5635974 | 5.7408063  | 5.7417598  |
| H  | 3.3484981 | 6.7959120  | 5.9036558  |
| C  | 3.2527435 | -0.7928097 | 10.9215589 |
| H  | 2.9822842 | 0.0592131  | 11.5612271 |
| H  | 3.9162437 | -1.4480301 | 11.5031589 |
| H  | 2.3329136 | -1.3539470 | 10.6968888 |
| C  | 8.5264060 | -0.7633210 | 1.9152542  |
| H  | 9.5060404 | -0.4230215 | 2.2812152  |
| H  | 8.1730509 | -0.0750115 | 1.1365055  |
| H  | 8.6131874 | -1.7740454 | 1.4900134  |
| C  | 5.3168662 | 4.4136951  | 2.1170011  |
| H  | 4.4416773 | 4.9650336  | 1.7433385  |
| H  | 5.7568329 | 3.8368752  | 1.2927719  |
| H  | 6.0675866 | 5.1166528  | 2.5068828  |
| Ba | 5.1967289 | 0.7173620  | 2.9880855  |

**Ni (II) L<sup>pn</sup>**

|    |            |            |            |
|----|------------|------------|------------|
| Ni | 4.7411796  | 0.2982042  | 6.4697622  |
| O  | 5.8397081  | -0.3951492 | 5.1050386  |
| O  | 4.5434337  | 1.6587614  | 5.1786288  |
| O  | 7.3909468  | -0.6244337 | 2.9970888  |
| O  | 4.9638739  | 3.2724840  | 3.1463142  |
| N  | 5.1587456  | -1.1636049 | 7.6225523  |
| N  | 3.6403405  | 1.2466278  | 7.7053173  |
| C  | 4.3047342  | 2.9142136  | 5.3825291  |
| C  | 6.8590560  | -1.1824875 | 5.2256691  |
| C  | 7.7484064  | -1.3409664 | 4.0996089  |
| C  | 7.1529599  | -1.9312432 | 6.4047766  |
| C  | 6.2262540  | -1.9170969 | 7.4791957  |
| H  | 6.4071725  | -2.6588529 | 8.2692414  |
| C  | 3.8077208  | 3.4419619  | 6.6125679  |
| C  | 4.5243720  | 3.8459910  | 4.3020318  |
| C  | 8.8639620  | -2.1589150 | 4.2009623  |
| H  | 9.5428960  | -2.2574960 | 3.3546819  |
| C  | 2.9470847  | 0.5566940  | 8.7962799  |
| H  | 2.1259867  | -0.0381243 | 8.3602841  |
| H  | 2.4868976  | 1.3061023  | 9.4628985  |
| C  | 3.4351835  | 2.5429783  | 7.6458051  |
| H  | 2.8705008  | 2.9849211  | 8.4783924  |
| C  | 3.8445870  | -0.3706380 | 9.6240815  |
| C  | 8.3002765  | -2.7703606 | 6.4706413  |
| H  | 8.4954275  | -3.3301865 | 7.3876729  |
| C  | 4.2804249  | -1.5410593 | 8.7346656  |
| H  | 4.7902730  | -2.2968663 | 9.3568897  |
| H  | 3.3804672  | -2.0206916 | 8.3127527  |
| C  | 9.1460760  | -2.8740157 | 5.3907141  |
| H  | 10.0314506 | -3.5079527 | 5.4354025  |
| C  | 5.0621935  | 0.3884680  | 10.1664550 |
| H  | 5.6695712  | 0.7913533  | 9.3451878  |
| H  | 5.6972501  | -0.2763106 | 10.7699331 |
| H  | 4.7448963  | 1.2274205  | 10.8031944 |
| C  | 4.3020621  | 5.2020068  | 4.4930359  |
| H  | 4.4916728  | 5.9021223  | 3.6804828  |
| C  | 3.5783474  | 4.8373482  | 6.7704787  |
| H  | 3.1975192  | 5.2072640  | 7.7246813  |
| C  | 3.8320901  | 5.7031669  | 5.7317284  |
| H  | 3.6681910  | 6.7744348  | 5.8469462  |
| C  | 3.0043127  | -0.9391408 | 10.7778539 |
| H  | 2.6489922  | -0.1322135 | 11.4350926 |
| H  | 3.6004537  | -1.6310548 | 11.3901926 |
| H  | 2.1246155  | -1.4866293 | 10.4058082 |
| C  | 8.2199465  | -0.7342060 | 1.8459195  |
| H  | 9.2454130  | -0.3769659 | 2.0467373  |
| H  | 7.7564553  | -0.0971171 | 1.0844221  |

|   |           |            |           |
|---|-----------|------------|-----------|
| H | 8.2662135 | -1.7735138 | 1.4754824 |
| C | 5.1992719 | 4.1314233  | 2.0367559 |
| H | 4.2793572 | 4.6590195  | 1.7281762 |
| H | 5.5343591 | 3.4796188  | 1.2222633 |
| H | 5.9852497 | 4.8750219  | 2.2568477 |

**Ni (II)L<sup>Pn</sup> + Li<sup>+</sup>**

|    |            |            |            |
|----|------------|------------|------------|
| Ni | 4.5907844  | 0.2058446  | 6.5087102  |
| O  | 5.5923569  | -0.5023957 | 5.0946318  |
| O  | 4.3383248  | 1.4888087  | 5.1682963  |
| O  | 7.1942722  | -0.3043137 | 3.0836431  |
| O  | 5.1848524  | 2.9535450  | 3.2187005  |
| N  | 5.0835557  | -1.2174624 | 7.6561982  |
| N  | 3.5603489  | 1.2052419  | 7.7433274  |
| C  | 4.2233118  | 2.7858724  | 5.3536919  |
| C  | 6.7064699  | -1.1920019 | 5.2013989  |
| C  | 7.6071693  | -1.1524720 | 4.1051134  |
| C  | 7.0331701  | -1.9561663 | 6.3427639  |
| C  | 6.1292778  | -1.9788940 | 7.4536536  |
| H  | 6.3379821  | -2.7371212 | 8.2190819  |
| C  | 3.7161910  | 3.3509777  | 6.5442592  |
| C  | 4.6332143  | 3.6383916  | 4.2954551  |
| C  | 8.7772999  | -1.8955456 | 4.1324609  |
| H  | 9.4749564  | -1.8716909 | 3.2968195  |
| C  | 2.9194268  | 0.5415661  | 8.8864024  |
| H  | 2.0799319  | -0.0580486 | 8.4966997  |
| H  | 2.4936367  | 1.3082756  | 9.5535162  |
| C  | 3.3278150  | 2.4873603  | 7.6193125  |
| H  | 2.7585659  | 2.9626592  | 8.4287165  |
| C  | 3.8577824  | -0.3672607 | 9.6907197  |
| C  | 8.2287425  | -2.7171369 | 6.3505858  |
| H  | 8.4740733  | -3.3198946 | 7.2261587  |
| C  | 4.2511827  | -1.5651573 | 8.8165455  |
| H  | 4.7866209  | -2.3056469 | 9.4326434  |
| H  | 3.3376394  | -2.0526060 | 8.4372245  |
| C  | 9.0808048  | -2.6871010 | 5.2620256  |
| H  | 10.0018178 | -3.2679753 | 5.2683630  |
| C  | 5.0986074  | 0.4017923  | 10.1634166 |
| H  | 5.6784746  | 0.7893456  | 9.3144296  |
| H  | 5.7555951  | -0.2497378 | 10.7565806 |
| H  | 4.8084937  | 1.2525481  | 10.7961303 |
| C  | 4.4906779  | 5.0131385  | 4.4075324  |
| H  | 4.8032935  | 5.6759944  | 3.6021000  |
| C  | 3.5668809  | 4.7569299  | 6.6384366  |
| H  | 3.1597935  | 5.1916870  | 7.5524563  |
| C  | 3.9450909  | 5.5694495  | 5.5853350  |
| H  | 3.8354631  | 6.6503272  | 5.6580403  |
| C  | 3.0665676  | -0.9066549 | 10.8939601 |
| H  | 2.7487416  | -0.0838169 | 11.5495069 |
| H  | 3.6871093  | -1.5872791 | 11.4931787 |
| H  | 2.1675927  | -1.4561474 | 10.5768754 |
| C  | 8.0302150  | -0.2424529 | 1.9116799  |
| H  | 9.0290228  | 0.1451656  | 2.1630059  |
| H  | 7.5335167  | 0.4445374  | 1.2182921  |
| H  | 8.1160468  | -1.2343173 | 1.4441118  |
| C  | 5.5854250  | 3.7421243  | 2.0813383  |
| H  | 4.7246464  | 4.2847949  | 1.6639608  |
| H  | 5.9638919  | 3.0337274  | 1.3367494  |
| H  | 6.3821079  | 4.4495073  | 2.3558862  |
| Li | 5.4953673  | 0.8759847  | 3.7279773  |

**Ni (II)L<sup>Pn</sup> + Na<sup>+</sup>**

|    |           |            |           |
|----|-----------|------------|-----------|
| Ni | 4.7180561 | 0.2825068  | 6.4883190 |
| O  | 5.7784757 | -0.4385118 | 5.1014261 |
| O  | 4.4857098 | 1.6243298  | 5.1770727 |
| O  | 7.3734301 | -0.6052581 | 2.9879105 |
| O  | 4.9787268 | 3.2494482  | 3.1346247 |
| N  | 5.1493994 | -1.1586182 | 7.6383065 |
| N  | 3.6441564 | 1.2358839  | 7.7204204 |
| C  | 4.2962728 | 2.9087958  | 5.3834129 |
| C  | 6.8460814 | -1.1947692 | 5.2252752 |
| C  | 7.7370565 | -1.3256733 | 4.1177331 |
| C  | 7.1480027 | -1.9111499 | 6.4100356 |
| C  | 6.2167144 | -1.9014301 | 7.4913607 |
| H  | 6.4041802 | -2.6444879 | 8.2769001 |
| C  | 3.8306428 | 3.4290931  | 6.6170288 |
| C  | 4.5414947 | 3.8282765  | 4.3194690 |

|    |            |            |            |
|----|------------|------------|------------|
| C  | 8.8745386  | -2.1135989 | 4.2169680  |
| H  | 9.5611413  | -2.2008298 | 3.3766074  |
| C  | 2.9416270  | 0.5476298  | 8.8120034  |
| H  | 2.1232634  | -0.0403518 | 8.3644101  |
| H  | 2.4799842  | 1.3010408  | 9.4700324  |
| C  | 3.4502573  | 2.5278413  | 7.6568491  |
| H  | 2.8868905  | 2.9773038  | 8.4847118  |
| C  | 3.8324866  | -0.3785132 | 9.6440660  |
| C  | 8.3101987  | -2.7188979 | 6.4860657  |
| H  | 8.5180913  | -3.2668420 | 7.4063141  |
| C  | 4.2694305  | -1.5434945 | 8.7521724  |
| H  | 4.7828041  | -2.3008254 | 9.3663692  |
| H  | 3.3763588  | -2.0240564 | 8.3196694  |
| C  | 9.1652669  | -2.8111938 | 5.4075752  |
| H  | 10.0643020 | -3.4231918 | 5.4612431  |
| C  | 5.0460866  | 0.3771203  | 10.2014456 |
| H  | 5.6685662  | 0.7865134  | 9.3941621  |
| H  | 5.6717372  | -0.2902000 | 10.8107407 |
| H  | 4.7231413  | 1.2110726  | 10.8407997 |
| C  | 4.3558929  | 5.1904792  | 4.5072109  |
| H  | 4.5594495  | 5.8916055  | 3.6999223  |
| C  | 3.6362171  | 4.8229805  | 6.7834757  |
| H  | 3.2706900  | 5.1988053  | 7.7402460  |
| C  | 3.9050898  | 5.6915800  | 5.7457956  |
| H  | 3.7671800  | 6.7646034  | 5.8689335  |
| C  | 2.9799379  | -0.9526785 | 10.7870849 |
| H  | 2.6220154  | -0.1485782 | 11.4451798 |
| H  | 3.5706223  | -1.6465246 | 11.4013000 |
| H  | 2.1026423  | -1.4973138 | 10.4068198 |
| C  | 8.2181325  | -0.7425290 | 1.8306536  |
| H  | 9.2329234  | -0.3680982 | 2.0343667  |
| H  | 7.7589922  | -0.1354969 | 1.0420274  |
| H  | 8.2639958  | -1.7910514 | 1.5001749  |
| C  | 5.1700261  | 4.1315311  | 2.0134698  |
| H  | 4.2341956  | 4.6519934  | 1.7595377  |
| H  | 5.4694441  | 3.4966609  | 1.1717494  |
| H  | 5.9651049  | 4.8645374  | 2.2174188  |
| Na | 5.4770755  | 0.8788316  | 3.2612324  |

**Ni (II) L<sup>pn</sup> + K<sup>+</sup>**

|    |            |            |            |
|----|------------|------------|------------|
| Ni | 4.6411528  | 0.2392624  | 6.4503754  |
| O  | 5.6665792  | -0.5230855 | 5.0587693  |
| O  | 4.3393927  | 1.5642090  | 5.1348637  |
| O  | 7.2757619  | -0.7050176 | 2.9352437  |
| O  | 4.8271935  | 3.2031170  | 3.0821540  |
| N  | 5.1112685  | -1.1632790 | 7.6273786  |
| N  | 3.6238662  | 1.2101402  | 7.7133307  |
| C  | 4.2744280  | 2.8567664  | 5.3678269  |
| C  | 6.7935102  | -1.1811195 | 5.2136871  |
| C  | 7.6944794  | -1.3063021 | 4.1099759  |
| C  | 7.1576481  | -1.8124640 | 6.4335051  |
| C  | 6.2221576  | -1.8427428 | 7.5102414  |
| H  | 6.4465438  | -2.5567062 | 8.3131641  |
| C  | 3.9223218  | 3.3955295  | 6.6348205  |
| C  | 4.5293745  | 3.7794477  | 4.3056793  |
| C  | 8.8980161  | -1.9832145 | 4.2554717  |
| H  | 9.5912015  | -2.0565859 | 3.4192732  |
| C  | 2.9097672  | 0.5341385  | 8.8029114  |
| H  | 2.0835178  | -0.0423154 | 8.3549154  |
| H  | 2.4582415  | 1.2936385  | 9.4616216  |
| C  | 3.5081757  | 2.5113671  | 7.6760739  |
| H  | 2.9929434  | 2.9825423  | 8.5232797  |
| C  | 3.7895506  | -0.4058600 | 9.6338501  |
| C  | 8.3836519  | -2.5137912 | 6.5516051  |
| H  | 8.6319931  | -2.9940702 | 7.4992972  |
| C  | 4.2321528  | -1.5642728 | 8.7336111  |
| H  | 4.7468269  | -2.3254816 | 9.3424687  |
| H  | 3.3413133  | -2.0438383 | 8.2955144  |
| C  | 9.2490121  | -2.5859079 | 5.4807111  |
| H  | 10.1989026 | -3.1114708 | 5.5657846  |
| C  | 5.0019012  | 0.3406611  | 10.2058521 |
| H  | 5.6303818  | 0.7562339  | 9.4065858  |
| H  | 5.6220956  | -0.3343725 | 10.8123694 |
| H  | 4.6772797  | 1.1692082  | 10.8515140 |
| C  | 4.4797002  | 5.1486573  | 4.5333148  |
| H  | 4.6980414  | 5.8474286  | 3.7277413  |
| C  | 3.8590464  | 4.7965047  | 6.8376759  |

|   |           |            |            |
|---|-----------|------------|------------|
| H | 3.5795214 | 5.1793500  | 7.8204033  |
| C | 4.1493960 | 5.6619175  | 5.8039568  |
| H | 4.1174330 | 6.7399665  | 5.9540245  |
| C | 2.9283397 | -0.9867845 | 10.7661532 |
| H | 2.5685415 | -0.1874347 | 11.4290442 |
| H | 3.5131966 | -1.6878386 | 11.3778674 |
| H | 2.0519233 | -1.5254420 | 10.3755793 |
| C | 8.1945877 | -0.7313086 | 1.8322175  |
| H | 9.1396267 | -0.2290638 | 2.0914805  |
| H | 7.7102060 | -0.1839345 | 1.0150643  |
| H | 8.3990651 | -1.7625093 | 1.5048499  |
| C | 5.1589428 | 4.0977605  | 2.0091952  |
| H | 4.3129972 | 4.7578243  | 1.7618332  |
| H | 5.3876932 | 3.4668106  | 1.1419479  |
| H | 6.0441660 | 4.7038856  | 2.2566793  |
| K | 4.6891721 | 0.4061464  | 2.7753451  |

**Ni (II)L<sup>pn</sup> + Mg<sup>2+</sup>**

|    |            |            |            |
|----|------------|------------|------------|
| Ni | 4.5337380  | 0.1685282  | 6.5211175  |
| O  | 5.5033185  | -0.5770073 | 5.0769539  |
| O  | 4.2387930  | 1.4423809  | 5.1514354  |
| O  | 7.1371626  | -0.2044062 | 3.1079068  |
| O  | 5.2511424  | 2.8574633  | 3.2347457  |
| N  | 5.0593631  | -1.2444083 | 7.6678224  |
| N  | 3.5250252  | 1.1922079  | 7.7535389  |
| C  | 4.1854863  | 2.7669964  | 5.3393450  |
| C  | 6.6704334  | -1.2224237 | 5.1858843  |
| C  | 7.5761312  | -1.1063320 | 4.1192018  |
| C  | 7.0014586  | -1.9751125 | 6.3229742  |
| C  | 6.0959995  | -2.0074339 | 7.4464890  |
| H  | 6.3130737  | -2.7707752 | 8.2035401  |
| C  | 3.6892595  | 3.3303717  | 6.5250573  |
| C  | 4.6647670  | 3.5890056  | 4.3066714  |
| C  | 8.7781713  | -1.7971801 | 4.1267056  |
| H  | 9.4870967  | -1.7257355 | 3.3035510  |
| C  | 2.9003356  | 0.5289396  | 8.9108910  |
| H  | 2.0603584  | -0.0729137 | 8.5271460  |
| H  | 2.4784746  | 1.2990831  | 9.5745789  |
| C  | 3.2887804  | 2.4683563  | 7.6114881  |
| H  | 2.7171106  | 2.9535944  | 8.4123373  |
| C  | 3.8550470  | -0.3682888 | 9.7096253  |
| C  | 8.2220273  | -2.6870484 | 6.3243735  |
| H  | 8.4904126  | -3.2953111 | 7.1888305  |
| C  | 4.2369379  | -1.5770416 | 8.8448135  |
| H  | 4.7804605  | -2.3105785 | 9.4599968  |
| H  | 3.3233456  | -2.0697445 | 8.4736006  |
| C  | 9.0848694  | -2.6044243 | 5.2390433  |
| H  | 10.0238049 | -3.1554556 | 5.2455410  |
| C  | 5.0995474  | 0.4087890  | 10.1602227 |
| H  | 5.6755457  | 0.7911752  | 9.3050470  |
| H  | 5.7624774  | -0.2330746 | 10.7562440 |
| H  | 4.8148930  | 1.2645971  | 10.7877680 |
| C  | 4.5819070  | 4.9700352  | 4.3985938  |
| H  | 4.9405586  | 5.6215787  | 3.6032929  |
| C  | 3.5946326  | 4.7372684  | 6.6121817  |
| H  | 3.1919033  | 5.1953205  | 7.5162410  |
| C  | 4.0245031  | 5.5366856  | 5.5608292  |
| H  | 3.9495771  | 6.6203578  | 5.6335116  |
| C  | 3.0780174  | -0.8999783 | 10.9274359 |
| H  | 2.7652811  | -0.0719397 | 11.5780047 |
| H  | 3.7097673  | -1.5688521 | 11.5272925 |
| H  | 2.1784008  | -1.4577502 | 10.6288372 |
| C  | 7.9640774  | -0.0992712 | 1.9061458  |
| H  | 8.9496599  | 0.3063051  | 2.1661563  |
| H  | 7.4385384  | 0.5883724  | 1.2352592  |
| H  | 8.0504765  | -1.0849991 | 1.4334726  |
| C  | 5.6794213  | 3.6223251  | 2.0639259  |
| H  | 4.8211909  | 4.1608939  | 1.6446175  |
| H  | 6.0458731  | 2.8878345  | 1.3390892  |
| H  | 6.4855824  | 4.3116389  | 2.3431883  |
| Mg | 5.4799834  | 0.8636812  | 3.7355364  |

**Ni (II)L<sup>pn</sup> + Ca<sup>2+</sup>**

|    |           |            |           |
|----|-----------|------------|-----------|
| Ni | 4.6465057 | 0.2385477  | 6.4988170 |
| O  | 5.6687431 | -0.5067557 | 5.0731203 |
| O  | 4.3642097 | 1.5561845  | 5.1489341 |
| O  | 7.2825172 | -0.5105703 | 2.9995369 |

|    |            |            |            |
|----|------------|------------|------------|
| O  | 5.0336243  | 3.1271715  | 3.1447705  |
| N  | 5.1182280  | -1.1829997 | 7.6561303  |
| N  | 3.6011159  | 1.2145097  | 7.7369420  |
| C  | 4.2506469  | 2.8741414  | 5.3643965  |
| C  | 6.7983629  | -1.2143637 | 5.2053985  |
| C  | 7.6912300  | -1.2680772 | 4.1167866  |
| C  | 7.1090221  | -1.9123927 | 6.3869697  |
| C  | 6.1817386  | -1.9193263 | 7.4852788  |
| H  | 6.3863836  | -2.6668885 | 8.2613155  |
| C  | 3.8004091  | 3.3933529  | 6.5926548  |
| C  | 4.5748447  | 3.7611573  | 4.3187189  |
| C  | 8.8645083  | -2.0062356 | 4.1909857  |
| H  | 9.5602806  | -2.0478676 | 3.3547292  |
| C  | 2.9174743  | 0.5306718  | 8.8481422  |
| H  | 2.0970792  | -0.0617566 | 8.4115356  |
| H  | 2.4622296  | 1.2902128  | 9.5017655  |
| C  | 3.4051854  | 2.5007136  | 7.6483907  |
| H  | 2.8398623  | 2.9657373  | 8.4654946  |
| C  | 3.8286972  | -0.3806316 | 9.6753388  |
| C  | 8.3010918  | -2.6696350 | 6.4514464  |
| H  | 8.5360009  | -3.2217994 | 7.3621477  |
| C  | 4.2543438  | -1.5564816 | 8.7915352  |
| H  | 4.7819946  | -2.3043965 | 9.4031266  |
| H  | 3.3606259  | -2.0462314 | 8.3719327  |
| C  | 9.1657022  | -2.7106411 | 5.3699289  |
| H  | 10.0864571 | -3.2892868 | 5.4221164  |
| C  | 5.0469685  | 0.3870788  | 10.2061540 |
| H  | 5.6618396  | 0.7920583  | 9.3898189  |
| H  | 5.6819955  | -0.2688310 | 10.8171264 |
| H  | 4.7292069  | 1.2256650  | 10.8412419 |
| C  | 4.4502550  | 5.1344146  | 4.4820450  |
| H  | 4.7053480  | 5.8245632  | 3.6798796  |
| C  | 3.6645684  | 4.7915740  | 6.7475266  |
| H  | 3.3022093  | 5.1927055  | 7.6946939  |
| C  | 3.9907899  | 5.6471862  | 5.7076997  |
| H  | 3.8934813  | 6.7246878  | 5.8295837  |
| C  | 2.9949953  | -0.9471905 | 10.8377857 |
| H  | 2.6475376  | -0.1375714 | 11.4939332 |
| H  | 3.5994238  | -1.6305552 | 11.4495057 |
| H  | 2.1132583  | -1.4990478 | 10.4802623 |
| C  | 8.1448145  | -0.5535140 | 1.8256505  |
| H  | 9.1337204  | -0.1409012 | 2.0641987  |
| H  | 7.6599435  | 0.0699946  | 1.0647879  |
| H  | 8.2273563  | -1.5833198 | 1.4548767  |
| C  | 5.3281378  | 3.9875689  | 2.0058843  |
| H  | 4.4271870  | 4.5377764  | 1.7051926  |
| H  | 5.6381245  | 3.3226319  | 1.1907840  |
| H  | 6.1469064  | 4.6764587  | 2.2502629  |
| Ca | 5.2970166  | 0.7668036  | 3.3008192  |

**Ni (II)L<sup>pn</sup> + Ba<sup>2+</sup>**

|    |           |            |           |
|----|-----------|------------|-----------|
| Ni | 4.5987757 | 0.2127613  | 6.4513838 |
| O  | 5.5948045 | -0.5856199 | 5.0326637 |
| O  | 4.2645632 | 1.5335516  | 5.1129519 |
| O  | 7.2141654 | -0.6760871 | 2.9271202 |
| O  | 4.8569156 | 3.1459490  | 3.0837889 |
| N  | 5.0942586 | -1.1726895 | 7.6368354 |
| N  | 3.6009143 | 1.1936492  | 7.7199245 |
| C  | 4.2638181 | 2.8512433  | 5.3618449 |
| C  | 6.7806189 | -1.1859927 | 5.2027457 |
| C  | 7.6785918 | -1.2611794 | 4.1148671 |
| C  | 7.1525971 | -1.7773420 | 6.4292208 |
| C  | 6.2123576 | -1.8303536 | 7.5131973 |
| H  | 6.4518089 | -2.5451886 | 8.3100448 |
| C  | 3.9326759 | 3.3745494  | 6.6301373 |
| C  | 4.5692605 | 3.7511456  | 4.3170642 |
| C  | 8.9180786 | -1.8742556 | 4.2549322 |
| H  | 9.6184418 | -1.9179951 | 3.4228476 |
| C  | 2.8858075 | 0.5138822  | 8.8114493 |
| H  | 2.0649735 | -0.0632974 | 8.3559450 |
| H  | 2.4295167 | 1.2747502  | 9.4632140 |
| C  | 3.4968398 | 2.4913294  | 7.6757256 |
| H  | 2.9782815 | 2.9716768  | 8.5148721 |
| C  | 3.7700516 | -0.4187966 | 9.6457281 |
| C  | 8.4078313 | -2.4148459 | 6.5538403 |
| H  | 8.6798775 | -2.8782222 | 7.5028891 |
| C  | 4.2163652 | -1.5774575 | 8.7478861 |

|    |            |            |            |
|----|------------|------------|------------|
| H  | 4.7385354  | -2.3348283 | 9.3528792  |
| H  | 3.3321530  | -2.0633343 | 8.3047886  |
| C  | 9.2841803  | -2.4491776 | 5.4834655  |
| H  | 10.2571038 | -2.9280739 | 5.5794698  |
| C  | 4.9781706  | 0.3329594  | 10.2204694 |
| H  | 5.6146635  | 0.7504811  | 9.4276694  |
| H  | 5.5947891  | -0.3378852 | 10.8342821 |
| H  | 4.6485706  | 1.1604369  | 10.8641518 |
| C  | 4.5758390  | 5.1237952  | 4.5374909  |
| H  | 4.8270999  | 5.8184800  | 3.7381608  |
| C  | 3.9236390  | 4.7722595  | 6.8374507  |
| H  | 3.6548650  | 5.1653714  | 7.8186008  |
| C  | 4.2555633  | 5.6340397  | 5.8065286  |
| H  | 4.2626256  | 6.7109543  | 5.9659152  |
| C  | 2.9066517  | -1.0020014 | 10.7768281 |
| H  | 2.5453666  | -0.2020779 | 11.4374156 |
| H  | 3.4941045  | -1.6972384 | 11.3917366 |
| H  | 2.0322836  | -1.5450392 | 10.3889457 |
| C  | 8.1047524  | -0.7315708 | 1.7814321  |
| H  | 9.0372166  | -0.1905519 | 1.9920091  |
| H  | 7.5791613  | -0.2372807 | 0.9548885  |
| H  | 8.3137590  | -1.7737038 | 1.5049133  |
| C  | 5.1912370  | 4.0350610  | 1.9847411  |
| H  | 4.3509893  | 4.7062459  | 1.7621198  |
| H  | 5.3815480  | 3.3947062  | 1.1141672  |
| H  | 6.0976707  | 4.6102254  | 2.2166775  |
| Ba | 4.7394695  | 0.4388822  | 2.9077830  |

**Ni (II)L<sup>Pn</sup> + Li<sup>+</sup>+ClO<sub>4</sub><sup>-1</sup>**

|    |            |            |            |
|----|------------|------------|------------|
| Ni | 4.8607741  | 0.2404598  | 6.3615026  |
| O  | 6.1480794  | -0.1897823 | 5.0930532  |
| O  | 4.5030391  | 1.5151655  | 5.0095570  |
| O  | 7.5306685  | -0.4093902 | 2.9273564  |
| O  | 5.0460022  | 3.1619046  | 3.0588289  |
| N  | 5.3539766  | -1.1955296 | 7.4883355  |
| N  | 3.6099075  | 1.0565241  | 7.5247008  |
| C  | 4.2110377  | 2.7727126  | 5.2114095  |
| C  | 7.1134072  | -1.0660757 | 5.1327615  |
| C  | 7.9222818  | -1.2092558 | 3.9656535  |
| C  | 7.3690756  | -1.8936158 | 6.2508357  |
| C  | 6.4412990  | -1.9162048 | 7.3252766  |
| H  | 6.6303601  | -2.6825410 | 8.0885330  |
| C  | 3.6228440  | 3.2495356  | 6.4117258  |
| C  | 4.4783298  | 3.7179580  | 4.1693486  |
| C  | 8.9763459  | -2.1062114 | 3.9595444  |
| H  | 9.5833092  | -2.2299356 | 3.0642865  |
| C  | 2.9474557  | 0.3055591  | 8.5944114  |
| H  | 2.2056182  | -0.3644072 | 8.1279186  |
| H  | 2.3954520  | 1.0085842  | 9.2405344  |
| C  | 3.2742375  | 2.3196385  | 7.4347206  |
| H  | 2.6226424  | 2.7100865  | 8.2281390  |
| C  | 3.9053638  | -0.5292180 | 9.4507636  |
| C  | 8.4649287  | -2.8007540 | 6.2245513  |
| H  | 8.6504142  | -3.4368028 | 7.0918686  |
| C  | 4.4774840  | -1.6489308 | 8.5762283  |
| H  | 5.0363115  | -2.3536104 | 9.2146965  |
| H  | 3.6425754  | -2.2110357 | 8.1239645  |
| C  | 9.2563686  | -2.8944058 | 5.1011774  |
| H  | 10.0895942 | -3.5958241 | 5.0700674  |
| C  | 5.0242130  | 0.3418604  | 10.0355441 |
| H  | 5.6230256  | 0.8032434  | 9.2388582  |
| H  | 5.6963567  | -0.2616613 | 10.6624098 |
| H  | 4.6061924  | 1.1449524  | 10.6605089 |
| C  | 4.1797925  | 5.0619579  | 4.3460615  |
| H  | 4.4040463  | 5.7783810  | 3.5568177  |
| C  | 3.3084946  | 4.6262423  | 6.5607445  |
| H  | 2.8469785  | 4.9674186  | 7.4891078  |
| C  | 3.5902615  | 5.5179588  | 5.5469899  |
| H  | 3.3612274  | 6.5770368  | 5.6607181  |
| C  | 3.0855726  | -1.1811404 | 10.5752324 |
| H  | 2.6324805  | -0.4146596 | 11.2205187 |
| H  | 3.7251494  | -1.8143089 | 11.2067624 |
| H  | 2.2759638  | -1.8097907 | 10.1742144 |
| C  | 8.0817387  | -0.6996183 | 1.6333485  |
| H  | 9.1726459  | -0.5433386 | 1.6261865  |
| H  | 7.6039956  | 0.0057410  | 0.9474544  |
| H  | 7.8294815  | -1.7292828 | 1.3412218  |

|    |           |            |           |
|----|-----------|------------|-----------|
| C  | 5.4647582 | 4.0319761  | 2.0053727 |
| H  | 4.6071191 | 4.5652391  | 1.5619780 |
| H  | 5.9231396 | 3.3770158  | 1.2570684 |
| H  | 6.2040365 | 4.7656041  | 2.3673622 |
| Li | 5.3742047 | 0.5051415  | 3.3432572 |
| O  | 5.2745386 | 0.8755860  | 1.3274912 |
| H  | 5.1792158 | -0.0880539 | 1.0648251 |
| H  | 4.4026233 | 1.2619277  | 1.1429874 |
| Cl | 4.5904744 | -2.2968702 | 2.3348559 |
| O  | 5.0836542 | -1.7745997 | 1.0205277 |
| O  | 5.6892892 | -2.9712196 | 3.0181758 |
| O  | 3.4663055 | -3.1857804 | 2.1189386 |
| O  | 4.1494406 | -1.1228560 | 3.1436092 |

**Ni (II)L<sup>n</sup> + Ba<sup>2+</sup> +2ClO<sub>4</sub><sup>-1</sup>**

|    |            |           |            |
|----|------------|-----------|------------|
| Ba | 15.9468685 | 5.8108634 | 10.3373801 |
| Ni | 12.7156211 | 5.8005194 | 12.0477406 |
| Cl | 18.8760245 | 4.2543826 | 9.6133546  |
| O  | 14.4983844 | 6.0839600 | 12.5492397 |
| O  | 17.0697115 | 5.9723121 | 12.9896054 |
| O  | 14.9000080 | 3.7196174 | 8.7159561  |
| O  | 13.4664239 | 4.6729015 | 10.7238582 |
| N  | 10.9832627 | 5.1685729 | 11.7946369 |
| N  | 12.1158285 | 7.2589775 | 13.0344017 |
| C  | 14.9372937 | 6.7819150 | 13.5785341 |
| C  | 14.1200143 | 7.6277116 | 14.3705684 |
| O  | 20.0798675 | 4.6040173 | 10.3432464 |
| O  | 17.8240555 | 3.7869404 | 10.5762837 |
| C  | 11.3987524 | 3.8356498 | 9.7883043  |
| C  | 13.5441848 | 3.4702781 | 8.6882178  |
| C  | 12.8084017 | 4.0308427 | 9.7805649  |
| C  | 10.5975059 | 4.3569276 | 10.8488309 |
| H  | 9.5503334  | 4.0263266 | 10.8756607 |
| C  | 16.3323262 | 6.7263965 | 13.8751047 |
| C  | 18.4800673 | 5.8180778 | 13.2480118 |
| H  | 18.8573844 | 5.1591495 | 12.4602699 |
| H  | 18.6401461 | 5.3530435 | 14.2324773 |
| H  | 18.9914738 | 6.7914054 | 13.2000709 |
| C  | 12.9029324 | 2.7503538 | 7.6907513  |
| H  | 13.4770968 | 2.3368825 | 6.8636441  |
| O  | 18.3073747 | 5.4745340 | 8.9519449  |
| C  | 12.7836994 | 7.9023826 | 13.9471209 |
| H  | 12.3069078 | 8.7936300 | 14.3745623 |
| C  | 10.8903902 | 7.8582124 | 12.4982732 |
| H  | 11.0448442 | 7.9544532 | 11.4145123 |
| H  | 10.7693692 | 8.8786401 | 12.8936416 |
| O  | 19.1141871 | 3.2290951 | 8.6156873  |
| C  | 16.8497233 | 7.4075040 | 14.9670169 |
| H  | 17.9124228 | 7.3472322 | 15.1943279 |
| C  | 14.6754423 | 8.3351727 | 15.4663132 |
| H  | 14.0309751 | 8.9922037 | 16.0525724 |
| C  | 10.0202039 | 5.5257659 | 12.8404247 |
| H  | 10.4895064 | 5.2938615 | 13.8071131 |
| H  | 9.1146183  | 4.9048428 | 12.7497989 |
| C  | 11.5082030 | 2.5498735 | 7.7288738  |
| H  | 11.0265733 | 1.9785160 | 6.9364688  |
| C  | 16.0139132 | 8.2070468 | 15.7742026 |
| H  | 16.4426562 | 8.7440074 | 16.6194069 |
| C  | 15.7246497 | 3.0449078 | 7.7416545  |
| H  | 15.4940906 | 3.4000356 | 6.7257038  |
| H  | 15.5794945 | 1.9568655 | 7.8072570  |
| H  | 16.7612879 | 3.2863702 | 7.9936412  |
| C  | 10.7694330 | 3.0827651 | 8.7632957  |
| H  | 9.6882826  | 2.9397962 | 8.8037750  |
| C  | 9.6294795  | 7.0185338 | 12.8015510 |
| C  | 8.5954974  | 7.2707979 | 11.6963240 |
| H  | 8.3918637  | 8.3463174 | 11.5893098 |
| H  | 7.6436198  | 6.7694605 | 11.9260849 |
| H  | 8.9580718  | 6.9016842 | 10.7255564 |
| C  | 9.0603456  | 7.3946313 | 14.1770663 |
| H  | 9.8316707  | 7.3159573 | 14.9581499 |
| H  | 8.2279886  | 6.7317445 | 14.4571938 |
| H  | 8.6806811  | 8.4262869 | 14.1710779 |
| Cl | 14.5007203 | 8.8806906 | 10.3258623 |
| O  | 13.9512700 | 7.6397569 | 9.6851297  |
| O  | 14.6727903 | 9.9165827 | 9.3315292  |
| O  | 15.8295525 | 8.4896130 | 10.8969520 |

o 13.6137278 9.3043028 11.4002072
